# Supplementary material for: Ruthenium-catalysed direct C–H amidation of 4-aryl-pyrrolo[2,3-d]pyrimidines with acyl/phosphoryl azides
Source: Royal Society of Chemistry journal article supplement (doi:10.1039/d3ob01946b), 2024-01-01

## Supporting Information

### Ruthenium-Catalysed Direct C–H Amidation of 4-Aryl-pyrrolo[2,3-*d*]pyrimidines with Acyl/Phosphoryl Azides

Chenhong Pan<sup>a</sup>, Chun He<sup>b</sup>, Jiangrong Wang<sup>a</sup>, Junyang Tang<sup>a</sup>, and Xingxian Zhang<sup>a,\*</sup>

<sup>a</sup> College of Pharmaceutical Science, Zhejiang University of Technology, Hangzhou 310014, P. R.

China

<sup>b</sup> Zhejiang Apelo Pharmaceutical Co., Ltd., Dongyang 322118, P. R. China

#### Table of Contents

|                                                                                    |    |
|------------------------------------------------------------------------------------|----|
| 1. General Information.....                                                        | S2 |
| 2. Condition optimization.....                                                     | S3 |
| 3. General Procedures .....                                                        | S4 |
| 4. Mechanism studies.....                                                          | S5 |
| 5. <sup>1</sup> H, <sup>13</sup> C, <sup>31</sup> P NMR Spectra for Compounds..... | S8 |

## 1. General Information

All reagents were purchased from commercial suppliers and used without further purification. The starting material 4-Chloro-7*H*-pyrrolo[2,3-*d*]pyrimidine is commercially available. A series of substrates **1** were prepared according to the literature procedure<sup>1-2</sup>. NMR spectra were obtained on a Bruker ADNANCE III 400 and 500MHz with TMS as the internal standard using CDCl<sub>3</sub> as the solvent. Chemical shifts are given in parts per million (ppm) and coupling constants in Hz. In the <sup>1</sup>H and <sup>13</sup>C spectra, chemical shifts are reported in ppm relative to CDCl<sub>3</sub> with 7.28 for <sup>1</sup>H and 77.04 for <sup>13</sup>C. The following abbreviations were used for <sup>1</sup>H NMR to indicate the signal multiplicity: s (singlet), d (doublet), t (triplet), m (multiplet). Melting points were measured on a BUCHI B-540 and uncorrected. Analytical thin-layer chromatography was carried out using commercial aluminum sheets precoated (0.2 mm layer thickness) with silica gel GF254, and visualization was effected with short wavelength UV light (254 nm). Product purification by flash chromatography was performed using 200-400 mesh silica gel. HRMS (ESI) was recorded using Agilent 6520 accurate-Mass Q-TOF LC/MS system.

### Reference:

1. M. Klečka, R. Pohl, B. Klepetářov, M. Hocek, Direct C–H Borylation and C–H Arylation of Pyrrolo[2,3-*d*]pyrimidines: Synthesis of 6,8-Disubstituted 7-Deazapurines, *Org. Biomol. Chem.*, 2009, **7**, 866-868.
2. J. Zhou, Z. Mao, H. Pan, X. Zhang, Pd-Catalyzed Highly Selective and Direct *Ortho* C–H Arylation of Pyrrolo[2,3-*d*]pyrimidine Derivatives, *Org. Chem. Front.*, 2020, **7**, 324-328.

## 2. Condition optimization

Table S1. Condition optimization<sup>a</sup>

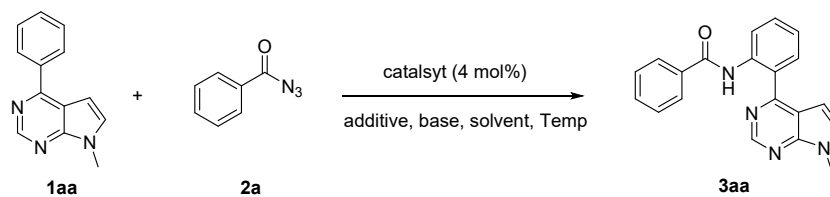

| Entry           | Catalyst                                                                         | Additive(mol%)                       | Base(mol%)                          | Temp. (°C) | Solvent          | Yield (%) <sup>b</sup> |
|-----------------|----------------------------------------------------------------------------------|--------------------------------------|-------------------------------------|------------|------------------|------------------------|
| 1               | [RuCl <sub>2</sub> ( <i>p</i> -cymene)] <sub>2</sub>                             | -                                    | NaOAc (20)                          | 85         | DCE <sup>c</sup> | NR <sup>d</sup>        |
| 2               | [RuCl <sub>2</sub> ( <i>p</i> -cymene)] <sub>2</sub>                             | AgBF <sub>4</sub> (16)               | NaOAc(20)                           | 85         | DCE              | NR                     |
| 3               | [RuCl <sub>2</sub> ( <i>p</i> -cymene)] <sub>2</sub>                             | AgOAc(16)                            | NaOAc(20)                           | 85         | DCE              | NR                     |
| 4               | [RuCl <sub>2</sub> ( <i>p</i> -cymene)] <sub>2</sub>                             | Ag <sub>2</sub> CO <sub>3</sub> (16) | NaOAc(20)                           | 85         | DCE              | 61                     |
| 5               | [RuCl <sub>2</sub> ( <i>p</i> -cymene)] <sub>2</sub>                             | AgSbF <sub>6</sub> (16)              | NaOAc(20)                           | 85         | DCE              | 36                     |
| 6               | [RuCl <sub>2</sub> ( <i>p</i> -cymene)] <sub>2</sub>                             | AgOTf(16)                            | NaOAc(20)                           | 85         | DCE              | 43                     |
| 7               | [RuCl <sub>2</sub> ( <i>p</i> -cymene)] <sub>2</sub>                             | AgNTf <sub>2</sub> (16)              | NaOAc(20)                           | 85         | DCE              | 88                     |
| 8               | [RuCl <sub>2</sub> ( <i>p</i> -cymene)] <sub>2</sub>                             | AgNTf <sub>2</sub> (16)              | KOAc(20)                            | 85         | DCE              | 87                     |
| 9               | [RuCl <sub>2</sub> ( <i>p</i> -cymene)] <sub>2</sub>                             | AgNTf <sub>2</sub> (16)              | K <sub>2</sub> CO <sub>3</sub> (20) | 85         | DCE              | 50                     |
| 10              | [RuCl <sub>2</sub> ( <i>p</i> -cymene)] <sub>2</sub>                             | AgNTf <sub>2</sub> (16)              | NaHCO <sub>3</sub> (20)             | 85         | DCE              | 25                     |
| 11              | [RuCl <sub>2</sub> ( <i>p</i> -cymene)] <sub>2</sub>                             | AgNTf <sub>2</sub> (16)              | -                                   | 85         | DCE              | 20                     |
| 12              | [RuCl <sub>2</sub> ( <i>p</i> -cymene)] <sub>2</sub>                             | AgNTf <sub>2</sub> (16)              | NaOAc(20)                           | r.t.       | DCE              | NR                     |
| 13              | [RuCl <sub>2</sub> ( <i>p</i> -cymene)] <sub>2</sub>                             | AgNTf <sub>2</sub> (16)              | NaOAc(20)                           | 50         | DCE              | 76                     |
| 14              | [RuCl <sub>2</sub> ( <i>p</i> -cymene)] <sub>2</sub>                             | AgNTf <sub>2</sub> (16)              | NaOAc(20)                           | 110        | DCE              | 37                     |
| 15              | [RuCl <sub>2</sub> ( <i>p</i> -cymene)] <sub>2</sub>                             | AgNTf <sub>2</sub> (16)              | NaOAc(20)                           | 85         | THF              | trace                  |
| 16              | [RuCl <sub>2</sub> ( <i>p</i> -cymene)] <sub>2</sub>                             | AgNTf <sub>2</sub> (16)              | NaOAc(20)                           | 85         | 1,4-dioxane      | trace                  |
| 17              | [RuCl <sub>2</sub> ( <i>p</i> -cymene)] <sub>2</sub>                             | AgNTf <sub>2</sub> (16)              | NaOAc(20)                           | 85         | MeCN             | NR                     |
| 18              | [RuCl <sub>2</sub> ( <i>p</i> -cymene)] <sub>2</sub>                             | AgNTf <sub>2</sub> (16)              | NaOAc(20)                           | 85         | Toluene          | 73                     |
| 19              | PdCl <sub>2</sub>                                                                | AgNTf <sub>2</sub> (16)              | NaOAc(20)                           | 85         | DCE              | NR                     |
| 20              | Pd(PPh <sub>3</sub> ) <sub>4</sub>                                               | AgNTf <sub>2</sub> (16)              | NaOAc(20)                           | 85         | DCE              | NR                     |
| 21              | Pd(MeCN) <sub>2</sub> Cl <sub>2</sub>                                            | AgNTf <sub>2</sub> (16)              | NaOAc(20)                           | 85         | DCE              | NR                     |
| 22              | Pd(OAc) <sub>2</sub>                                                             | AgNTf <sub>2</sub> (16)              | NaOAc(20)                           | 85         | DCE              | NR                     |
| 23              | Cu(OAc) <sub>2</sub>                                                             | AgNTf <sub>2</sub> (16)              | NaOAc(20)                           | 85         | DCE              | NR                     |
| 24              | Co(OAc) <sub>2</sub>                                                             | AgNTf <sub>2</sub> (16)              | NaOAc(20)                           | 85         | DCE              | NR                     |
| 25              | Cp*Co(CO)I <sub>2</sub>                                                          | AgNTf <sub>2</sub> (16)              | NaOAc(20)                           | 85         | DCE              | NR                     |
| 26              | -                                                                                | AgNTf <sub>2</sub> (16)              | NaOAc(20)                           | 85         | DCE              | NR                     |
| 27              | [IrCp*Cl <sub>2</sub> ] <sub>2</sub>                                             | AgNTf <sub>2</sub> (16)              | NaOAc(20)                           | 85         | DCE              | 71                     |
| 28              | [RuI <sub>2</sub> ( <i>p</i> -cymene)] <sub>2</sub>                              | AgNTf <sub>2</sub> (16)              | NaOAc(20)                           | 85         | DCE              | 62                     |
| 29              | [(C <sub>6</sub> H <sub>5</sub> ) <sub>3</sub> P] <sub>3</sub> RuCl <sub>2</sub> | AgNTf <sub>2</sub> (16)              | NaOAc(20)                           | 85         | DCE              | NR                     |
| 30              | [Ru(COD)Cl <sub>2</sub> ] <sub>n</sub>                                           | AgNTf <sub>2</sub> (16)              | NaOAc(20)                           | 85         | DCE              | NR                     |
| 31 <sup>e</sup> | [RuCl <sub>2</sub> ( <i>p</i> -cymene)] <sub>2</sub>                             | AgNTf <sub>2</sub> (16)              | NaOAc(20)                           | 85         | DCE              | 69                     |

| Entry | Catalyst                                             | Additive                | Base      | Temp. (°C) | Solvent | Yield (%) <sup>b</sup> |
|-------|------------------------------------------------------|-------------------------|-----------|------------|---------|------------------------|
| 32    | [RuCl <sub>2</sub> ( <i>p</i> -cymene)] <sub>2</sub> | AgNTf <sub>2</sub> (4)  | NaOAc(20) | 85         | DCE     | 17                     |
| 33    | [RuCl <sub>2</sub> ( <i>p</i> -cymene)] <sub>2</sub> | AgNTf <sub>2</sub> (8)  | NaOAc(20) | 85         | DCE     | 35                     |
| 34    | [RuCl <sub>2</sub> ( <i>p</i> -cymene)] <sub>2</sub> | AgNTf <sub>2</sub> (12) | NaOAc(20) | 85         | DCE     | 59                     |
| 35    | [RuCl <sub>2</sub> ( <i>p</i> -cymene)] <sub>2</sub> | AgNTf <sub>2</sub> (20) | NaOAc(20) | 85         | DCE     | 75                     |
| 36    | [RuCl <sub>2</sub> ( <i>p</i> -cymene)] <sub>2</sub> | AgNTf <sub>2</sub> (16) | NaOAc(4)  | 85         | DCE     | 32                     |
| 37    | [RuCl <sub>2</sub> ( <i>p</i> -cymene)] <sub>2</sub> | AgNTf <sub>2</sub> (16) | NaOAc(8)  | 85         | DCE     | 56                     |
| 38    | [RuCl <sub>2</sub> ( <i>p</i> -cymene)] <sub>2</sub> | AgNTf <sub>2</sub> (16) | NaOAc(12) | 85         | DCE     | 69                     |
| 39    | [RuCl <sub>2</sub> ( <i>p</i> -cymene)] <sub>2</sub> | AgNTf <sub>2</sub> (16) | NaOAc(16) | 85         | DCE     | 82                     |
| 40    | [RuCl <sub>2</sub> ( <i>p</i> -cymene)] <sub>2</sub> | AgNTf <sub>2</sub> (16) | NaOAc(24) | 85         | DCE     | 86                     |

<sup>a</sup> General conditions: **1a** (0.20 mmol), **2a** (0.40 mmol), [RuCl<sub>2</sub>(*p*-cymene)]<sub>2</sub> (4 mol%), additive (x mol%), base (x mol%) in solvent (3 mL), under air, 8 h. <sup>b</sup> Isolated yield. <sup>c</sup> DCE:1,2-dichloroethane. <sup>d</sup> NR: no reaction. <sup>e</sup> **2a** (0.30 mmol).

### 3. General Procedure

**3.1 General Procedures for the synthesis of 3aa-3o:** A 15 mL pressure vessel equipped with a magnetic stirrer was charged with **1** (1.0 eq.), **2a** (2.0 eq.), [RuCl<sub>2</sub>(*p*-cymene)]<sub>2</sub> (4 mol%), AgNTf<sub>2</sub> (16 mol%), NaOAc (20 mol%) and DCE (3.0 mL) as solvent. The reaction mixture was then stirred at 85 °C in oil bath. After completion of the reaction, it was then cooled to room temperature. The solvent was then removed in vacuo and the residue was purified by column chromatography on silica gel to provide the desired product **3**.

**3.2 General Procedures for the synthesis of 5aa-5bd:** A 15 mL pressure vessel equipped with a magnetic stirrer was charged with starting material (1.0 eq.), **4** (2.0 eq.), [RuCl<sub>2</sub>(*p*-cymene)]<sub>2</sub> (4 mol%), AgNTf<sub>2</sub> (16 mol%), NaOAc (20 mol%) and DCE (3.0 mL) as solvent. After the reaction mixture was stirred at 85 °C in oil bath. After completion of the reaction, it was then cooled to room temperature. The solvent was then removed in vacuo and the residue was purified by column chromatography on silica gel to provide the desired product **5**.

#### 4. Mechanism studies

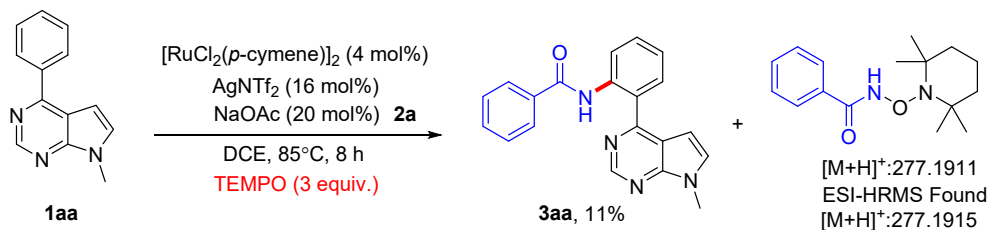

To 15 mL pressure vessel equipped with a magnetic stirrer was charged with **1aa** (0.2 mmol), **2a** (0.4 mmol),  $[\text{RuCl}_2(p\text{-cymene})]_2$  (5.0 mg, 4 mol%),  $\text{AgNTf}_2$  (12 mg, 16 mol%),  $\text{NaOAc}$  (3 mg, 20 mol%), 2,2,6,6-tetramethyl-1-piperidinyloxy (TEMPO) (94 mg, 0.6 mmol) and DCE (3.0 mL) were added. The reaction mixture was then stirred at 85 °C in oil bath for 8 h. A lower yield of the amidated products was observed and the reaction of TEMPO was detected by ESI-HRMS analysis.

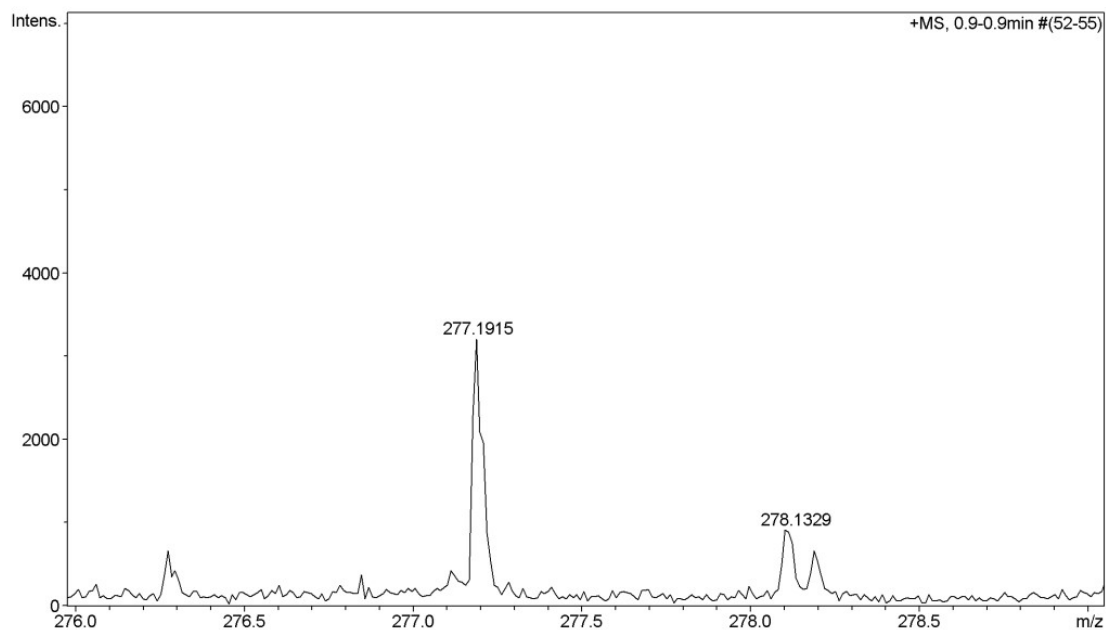

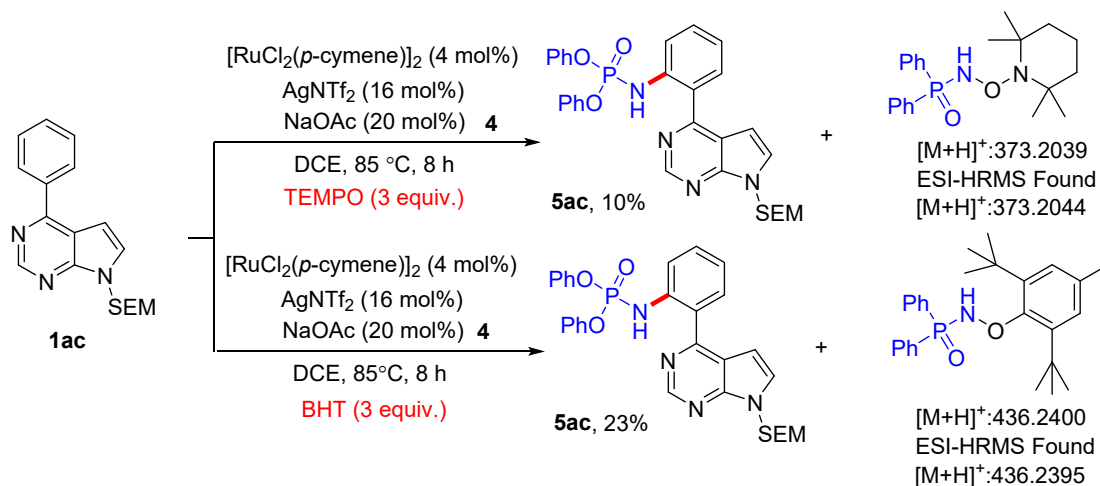

To 15 mL pressure vessel equipped with a magnetic stirrer was charged with with **1ac** (0.2 mmol), **4a** (0.4 mmol),  $[\text{RuCl}_2(p\text{-cymene})]_2$  (5.0 mg, 4 mol%),  $\text{AgNTf}_2$  (12 mg, 16 mol%),  $\text{NaOAc}$  (3 mg, 20 mol%) and 2,2,6,6-tetramethyl-1-piperidinyloxy (TEMPO) (94 mg, 0.6 mmol) or 2,6-di-tert-butyl-4-methylphenol (BHT) (132 mg, 0.6 mmol) and DCE (3.0 mL) were added, respectively. The reaction mixture was then stirred at 85 °C in oil bath for 8 h. Both lower yields of the phosphoramidated products were observed and the reaction of TEMPO and BHT were detected by ESI-HRMS analysis.

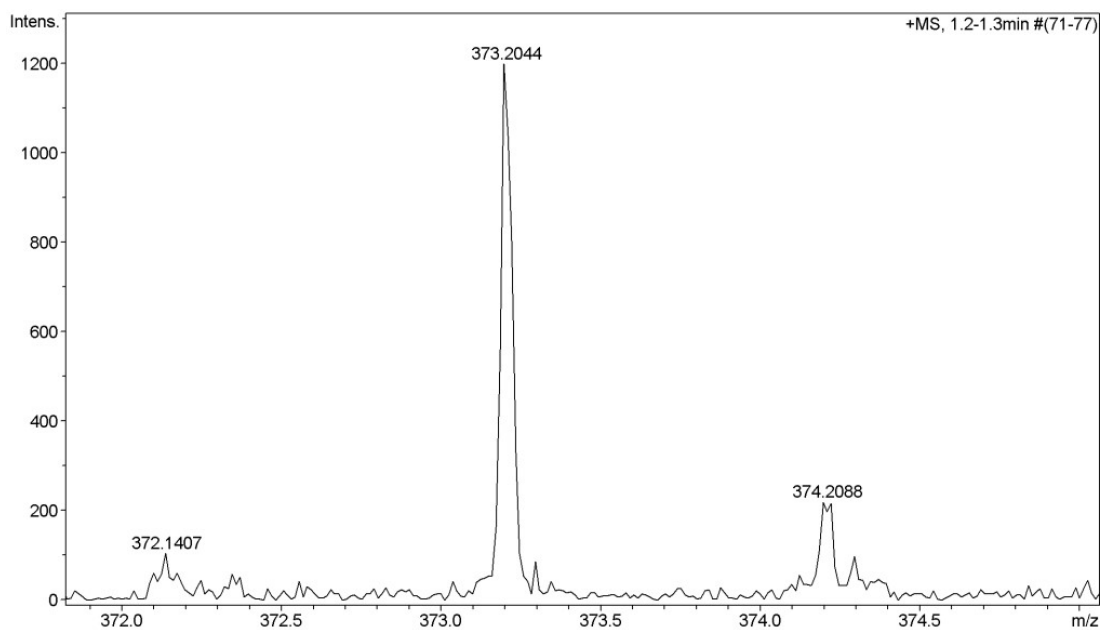

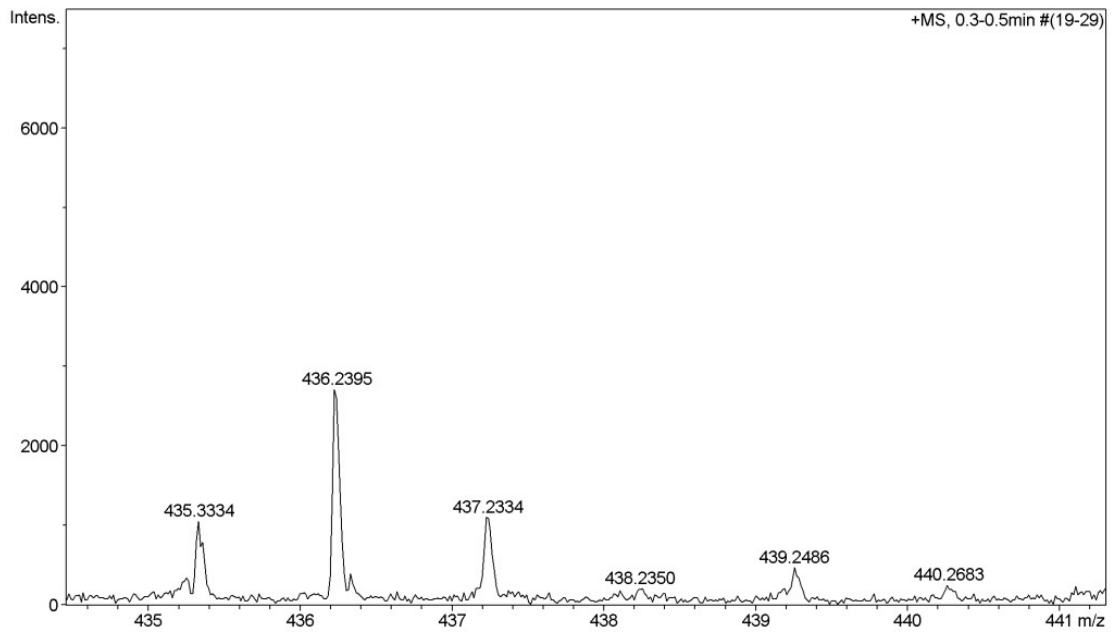

## 5. Characterization of Compounds

### *N*-(2-(7-methyl-7*H*-pyrrolo[2,3-*d*]pyrimidin-4-yl)phenyl)benzamide (**3aa**)

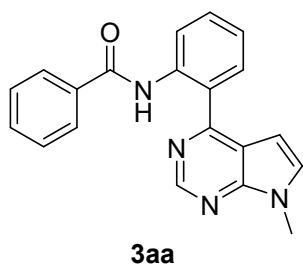

The reaction of 7-methyl-4-phenyl-7*H*-pyrrolo[2,3-*d*]pyrimidine (130 mg, 0.45 mmol), benzoyl azide (0.90 mmol), [RuCl<sub>2</sub>(*p*-cymene)]<sub>2</sub> (11 mg, 4 mol%), AgNTf<sub>2</sub> (28 mg, 16 mol%) and NaOAc (7 mg, 20 mol%) in DCE (7 mL) at 85 °C for 8 h, affords 130 mg (88%) of **3aa** (PE/EA = 4:1) as a yellow solid. Mp: 191-193 °C. <sup>1</sup>H NMR (400 MHz, CDCl<sub>3</sub>) δ 12.98 (s, 1H), 8.98 (s, 1H), 8.82 (d, *J* = 8.3 Hz, 1H), 8.03-7.98 (m, 3H), 7.59-7.47 (m, 4H), 7.27-7.24 (m, 2H), 6.77-6.75 (m, 1H), 3.88 (d, *J* = 5.9 Hz, 3H). <sup>13</sup>C NMR (101 MHz, CDCl<sub>3</sub>) δ 165.42, 157.33, 152.00, 149.53, 138.21, 135.39, 131.66, 131.00, 130.66, 128.65, 127.30, 124.71, 123.33, 122.18, 116.39, 101.02, 31.27. HRMS *m/z* (ESI) calcd for C<sub>20</sub>H<sub>16</sub>N<sub>4</sub>O [M+H]<sup>+</sup>: 351.1216, found: 351.1217.

### *N*-(2-(7-benzyl-7*H*-pyrrolo[2,3-*d*]pyrimidin-4-yl)phenyl)benzamide (**3ab**)

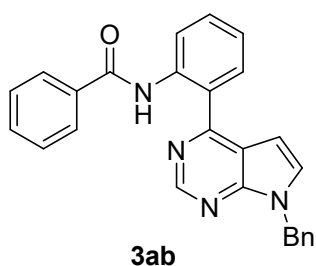

The reaction of 7-benzyl-4-phenyl-7*H*-pyrrolo[2,3-*d*]pyrimidine (140 mg, 0.49 mmol), benzoyl azide (0.98 mmol), [RuCl<sub>2</sub>(*p*-cymene)]<sub>2</sub> (12 mg, 4 mol%), AgNTf<sub>2</sub> (30 mg, 16 mol%) and NaOAc (8 mg, 20 mol%) in DCE (7 mL) at 85 °C for 9 h, affords 156 mg (78%) of **3ab** (PE/EA = 4:1) as a white solid. Mp: 122-124 °C. <sup>1</sup>H NMR (400 MHz, DMSO-*d*<sub>6</sub>) δ 12.62 (s, 1H), 9.08 (s, 1H), 8.58-8.53 (m, 1H), 8.08-8.04 (m, 1H), 7.95-7.90 (m, 2H), 7.86 (d, *J* = 3.6 Hz, 1H), 7.62-7.55 (m, 4H), 7.40-7.35 (m, 1H), 7.33-7.24 (m, 5H), 6.87 (d, *J* = 3.7 Hz, 1H), 5.54 (s, 2H). <sup>13</sup>C NMR (101 MHz, DMSO-*d*<sub>6</sub>) δ 164.92, 156.74, 151.69, 150.25, 137.93, 135.01, 132.37, 131.81, 131.42, 131.21, 129.38, 129.13, 128.11, 127.93, 127.51, 125.86, 124.50, 122.63, 116.17, 101.13, 47.85. HRMS *m/z* (ESI) calcd for C<sub>26</sub>H<sub>20</sub>N<sub>4</sub>O [M+H]<sup>+</sup>: 405.1710, found: 405.1713.



***N*-(2-(7-((2-(trimethylsilyl)ethoxy)methyl)-7*H*-pyrrolo[2,3-*d*]pyrimidin-4-yl)phenyl)benzamide (**3ac**)**

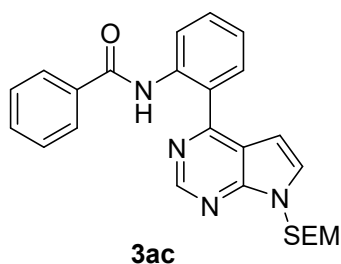

The reaction of 4-phenyl-7-((2-(trimethylsilyl)ethoxy)methyl)-7*H*-pyrrolo[2,3-*d*]pyrimidine (85 mg, 0.26 mmol), benzoyl azide (0.52 mmol), [RuCl<sub>2</sub>(*p*-cymene)]<sub>2</sub> (6 mg, 4 mol%), AgNTf<sub>2</sub> (16 mg, 16 mol%) and NaOAc (4 mg, 20 mol%) in DCE (4 mL) at 85 °C for 8 h, affords 73 mg (63%) of **3ac** (PE/EA = 4:1) as a yellow solid. Mp: 151-153 °C. <sup>1</sup>H NMR (400 MHz, CDCl<sub>3</sub>) δ 12.89 (s, 1H), 9.02 (s, 1H), 8.81 (d, *J* = 8.3 Hz, 1H), 8.06-8.01 (m, 2H), 7.64-7.45 (m, 4H), 7.36-7.27 (m, 1H), 7.24 (t, *J* = 7.9 Hz, 1H), 6.96-6.84 (m, 2H), 5.70 (d, *J* = 23.3 Hz, 2H), 3.64-3.52 (m, 2H), 1.01-0.92 (m, 2H), -0.03 (s, 9H). <sup>13</sup>C NMR (101 MHz, CDCl<sub>3</sub>) δ 165.59, 157.75, 152.58, 149.96, 138.09, 135.28, 131.75, 131.19, 130.76, 128.70, 127.32, 124.67, 123.50, 122.36, 116.60, 115.41, 102.35, 72.98, 66.75, 17.72, -1.44. HRMS *m/z* (ESI) calcd for C<sub>25</sub>H<sub>28</sub>N<sub>4</sub>O<sub>2</sub>Si [M+H]<sup>+</sup>: 467.1874, found: 467.1874.

***N*-(2-(7-tosyl-7*H*-pyrrolo[2,3-*d*]pyrimidin-4-yl)phenyl)benzamide (**3ad**)**

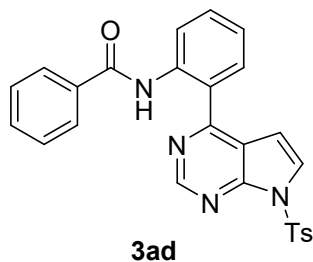

The reaction of 4-phenyl-7-tosyl-7*H*-pyrrolo[2,3-*d*]pyrimidine (192 mg, 0.55 mmol), benzoyl azide (1.10 mmol), [RuCl<sub>2</sub>(*p*-cymene)]<sub>2</sub> (13 mg, 4 mol%), AgNTf<sub>2</sub> (34 mg, 16 mol%) and NaOAc (9 mg, 20 mol%) in DCE (8 mL) at 85 °C for 9 h, affords 174 mg (68%) of **3ad** (PE/EA = 4:1) as a white solid. Mp: 219-220 °C. <sup>1</sup>H NMR (500 MHz, DMSO-*d*<sub>6</sub>) δ 12.43 (s, 1H), 9.10 (s, 1H), 8.76 (d, *J* = 8.3 Hz, 1H), 8.15 (d, *J* = 8.4 Hz, 2H), 8.00-7.96 (m, 2H), 7.86 (d, *J* = 4.0 Hz, 1H), 7.84-7.80 (m, 1H), 7.60-7.49 (m, 4H), 7.36 (d, *J* = 8.2 Hz, 2H), 7.31-7.26 (m, 1H), 6.92 (d, *J* = 4.1 Hz, 1H), 2.41 (s, 3H). <sup>13</sup>C NMR (101 MHz, DMSO-*d*<sub>6</sub>) δ 160.62, 154.09, 147.40, 146.58, 141.44, 133.31, 130.36, 129.84, 127.11, 126.98, 125.99, 125.27, 124.00, 123.71, 122.65, 122.48, 119.11, 118.86, 117.88, 113.79, 100.05, 17.00. HRMS *m/z* (ESI) calcd for C<sub>26</sub>H<sub>20</sub>N<sub>4</sub>O<sub>3</sub>S [M+H]<sup>+</sup>: 469.1329, found: 469.1329.

### *N*-(2-(7*H*-pyrrolo[2,3-*d*]pyrimidin-4-yl)phenyl)benzamide (**3ae**)

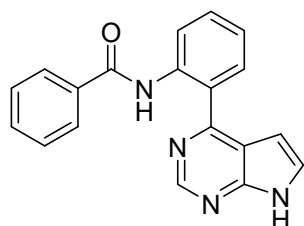

**3ae**

The reaction of 4-phenyl-7*H*-pyrrolo[2,3-*d*]pyrimidine (148 mg, 0.76 mmol), benzoyl azide (1.52 mmol), [RuCl<sub>2</sub>(*p*-cymene)]<sub>2</sub> (19 mg, 4 mol%), AgNTf<sub>2</sub> (53 mg, 16 mol%) and NaOAc (12 mg, 20 mol%) in DCE (11 mL) at 85 °C for 10 h, affords 12 mg (5%) of **3ae** (PE/EA = 2:1) as a white solid.

Mp: 258-260 °C. <sup>1</sup>H NMR (400 MHz, DMSO-*d*<sub>6</sub>) δ 12.81 (s, 1H), 12.46 (s, 1H), 9.03 (s, 1H), 8.60-6.58 (m, 1H), 8.10-8.07 (m, 1H), 7.96-7.94 (m, 2H), 7.73-7.71 (m, 1H), 7.63-7.56 (m, 4H), 7.39-7.35 (m, 1H), 6.83-6.81 (m, 1H). <sup>13</sup>C NMR (101 MHz, DMSO-*d*<sub>6</sub>) δ 164.87, 156.32, 153.14, 149.98, 137.97, 135.04, 132.39, 131.37, 131.09, 129.43, 128.84, 127.48, 125.75, 124.40, 122.39, 115.86, 101.11. HRMS *m/z* (ESI) calcd for C<sub>19</sub>H<sub>14</sub>N<sub>4</sub>O [M+H]<sup>+</sup>: 315.1240, found: 315.1230.

### *N*-(3-methoxy-2-(7-tosyl-7*H*-pyrrolo[2,3-*d*]pyrimidin-4-yl)phenyl)benzamide (**3b**)

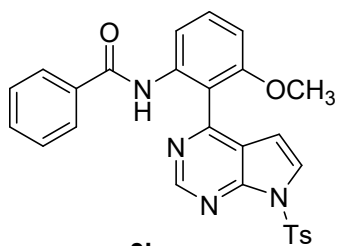

**3b**

The reaction of 4-(2-methoxyphenyl)-7-tosyl-7*H*-pyrrolo[2,3-*d*]pyrimidine (53 mg, 0.14 mmol), benzoyl azide (0.28 mmol), [RuCl<sub>2</sub>(*p*-cymene)]<sub>2</sub> (3 mg, 4 mol%), AgNTf<sub>2</sub> (9 mg, 16 mol%) and NaOAc (2 mg, 20 mol%) in DCE (2 mL) at 85 °C for 8 h, affords 59 mg (82%) of

**3b** (PE/EA = 4:1) as a white solid. Mp: 175-176 °C. <sup>1</sup>H NMR (400 MHz, DMSO-*d*<sub>6</sub>) δ 10.21 (s, 1H), 9.05 (s, 1H), 8.06 (d, *J* = 8.3 Hz, 2H), 7.94 (d, *J* = 4.0 Hz, 1H), 7.61-7.57 (m, 3H), 7.56-7.50 (m, 2H), 7.47-7.40 (m, 4H), 7.09-7.07 (m, 1H), 6.58 (d, *J* = 4.0 Hz, 1H), 3.72 (s, 3H), 2.35 (s, 3H). <sup>13</sup>C NMR (101 MHz, DMSO-*d*<sub>6</sub>) δ 165.41, 157.55, 156.42, 152.60, 151.26, 146.64, 137.64, 134.91, 134.67, 132.01, 131.57, 130.73, 128.88, 128.27, 127.61, 127.31, 121.29, 118.54, 117.68, 108.90, 106.23, 56.11, 21.60. HRMS *m/z* (ESI) calcd for C<sub>27</sub>H<sub>22</sub>N<sub>4</sub>O<sub>4</sub>S [M+Na]<sup>+</sup>: 521.1254, found: 521.1253.

***N*-(5-fluoro-2-(7-methyl-7*H*-pyrrolo[2,3-*d*]pyrimidin-4-yl)phenyl)benzamide (3c)**

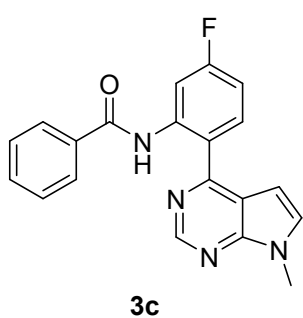

The reaction of 4-(2-fluorophenyl)-7-methyl-7*H*-pyrrolo[2,3-*d*]pyrimidine (188 mg, 0.83 mmol), benzoyl azide (1.66 mmol), [RuCl<sub>2</sub>(*p*-cymene)]<sub>2</sub> (20 mg, 4 mol%), AgNTf<sub>2</sub> (51 mg, 16 mol%) and NaOAc (14 mg, 20 mol%) in DCE (12 mL) at 85 °C for 8 h, affords 220 mg (77%) of **3c** (PE/EA = 4:1) as a white solid. Mp: 195-197 °C. <sup>1</sup>H NMR (400 MHz, CDCl<sub>3</sub>) δ 13.31 (s, 1H), 8.94 (s, 1H), 8.69-8.66 (m, 1H), 8.02-7.97 (m, 3H), 7.59-7.46 (m, 3H), 7.27 (d, *J* = 3.5 Hz, 1H), 6.97-6.91 (m, 1H), 6.74 (d, *J* = 3.5 Hz, 1H), 3.90 (s, 3H). <sup>13</sup>C NMR (101 MHz, CDCl<sub>3</sub>) δ 165.63, 163.92 (d, *J*<sub>C-F</sub> = 250.5 Hz), 156.52, 151.89, 149.35, 140.38 (d, *J*<sub>C-F</sub> = 12.1 Hz), 134.98, 132.31 (d, *J*<sub>C-F</sub> = 10.1 Hz), 131.92, 130.77, 128.71, 127.31, 120.40 (d, *J*<sub>C-F</sub> = 3.1 Hz), 116.04, 110.25 (d, *J*<sub>C-F</sub> = 22.2 Hz), 109.00 (d, *J*<sub>C-F</sub> = 27.3 Hz), 100.77, 31.30. HRMS *m/z* (ESI) calcd for C<sub>20</sub>H<sub>15</sub>FN<sub>4</sub>O [M+H]<sup>+</sup>: 369.1122, found: 369.1125.

***N*-(5-methyl-2-(7-methyl-7*H*-pyrrolo[2,3-*d*]pyrimidin-4-yl)phenyl)benzamide (3d)**

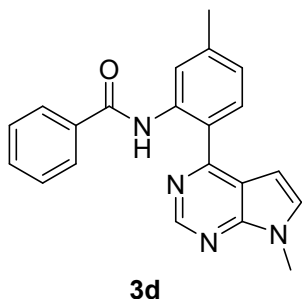

The reaction of 7-methyl-4-(*p*-tolyl)-7*H*-pyrrolo[2,3-*d*]pyrimidine (125 mg, 0.56 mmol), benzoyl azide (1.12 mmol), [RuCl<sub>2</sub>(*p*-cymene)]<sub>2</sub> (14 mg, 4 mol%), AgNTf<sub>2</sub> (35 mg, 16 mol%) and NaOAc (9 mg, 20 mol%) in DCE (8 mL) at 85 °C for 8 h, affords 162 mg (85%) of **3d** (PE/EA = 4:1) as a yellow solid. Mp: 169-170 °C. <sup>1</sup>H NMR (400 MHz, CDCl<sub>3</sub>) δ 13.09 (s, 1H), 8.94 (s, 1H), 8.68 (s, 1H), 8.04-8.02 (m, 2H), 7.88 (d, *J* = 8.0 Hz, 1H), 7.56-7.46 (m, 3H), 7.21 (d, *J* = 3.6 Hz, 1H), 7.07-7.05 (m, 1H), 6.74 (d, *J* = 3.6 Hz, 1H), 3.86 (s, 3H), 2.48 (s, 3H). <sup>13</sup>C NMR (101 MHz, CDCl<sub>3</sub>) δ 165.37, 157.36, 151.83, 149.40, 141.59, 138.19, 135.43, 131.63, 130.68, 130.35, 128.63, 127.30, 124.24, 122.46, 121.91, 116.07, 101.03, 31.22, 21.92. HRMS *m/z* (ESI) calcd for C<sub>21</sub>H<sub>18</sub>N<sub>4</sub>O [M+H]<sup>+</sup>: 365.1373, found: 365.1371.

***N*-(5-(*tert*-butyl)-2-(7-methyl-7*H*-pyrrolo[2,3-*d*]pyrimidin-4-yl)phenyl)benzamide (3e)**

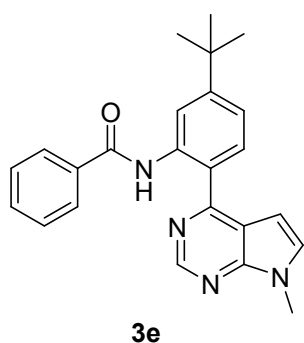

The reaction of 4-(4-(*tert*-butyl)phenyl)-7-methyl-7*H*-pyrrolo[2,3-*d*]pyrimidine (101 mg, 0.38 mmol), benzoyl azide (0.76 mmol), [RuCl<sub>2</sub>(*p*-cymene)]<sub>2</sub> (9 mg, 4 mol%), AgNTf<sub>2</sub> (24 mg, 16 mol%) and NaOAc (6 mg, 20 mol%) in DCE (6 mL) at 85 °C for 8 h, affords 66 mg (45%) of **3e** (PE/EA = 4:1) as a yellow solid. Mp: 188-189 °C. <sup>1</sup>H NMR (400 MHz, CDCl<sub>3</sub>) δ 13.10 (s, 1H), 9.08-8.83 (m, 2H), 8.13-7.92 (m, 3H), 7.61-7.46 (m, 3H), 7.33-7.31 (m, 1H), 7.27 (d, *J* = 3.6 Hz, 1H), 6.83 (d, *J* = 3.6 Hz, 1H), 3.92 (s, 3H), 1.46 (s, 9H). <sup>13</sup>C NMR (101 MHz, CDCl<sub>3</sub>) δ 165.52, 157.41, 154.74, 151.93, 149.54, 138.20, 135.55, 131.61, 130.49, 130.30, 128.65, 127.31, 121.99, 120.51, 119.35, 116.17, 101.15, 35.25, 31.22. HRMS *m/z* (ESI) calcd for C<sub>24</sub>H<sub>25</sub>N<sub>4</sub>O [M+H]<sup>+</sup>: 385.2023, found: 385.2022.

***N*-(3-fluoro-2-(7-methyl-7*H*-pyrrolo[2,3-*d*]pyrimidin-4-yl)phenyl)benzamide (3f)**

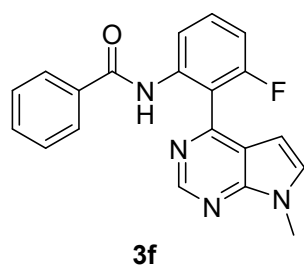

The reaction of 4-(2-fluorophenyl)-7-methyl-7*H*-pyrrolo[2,3-*d*]pyrimidine (86 mg, 0.38 mmol), benzoyl azide (0.76 mmol), [RuCl<sub>2</sub>(*p*-cymene)]<sub>2</sub> (9 mg, 4 mol%), AgNTf<sub>2</sub> (24 mg, 16 mol%) and NaOAc (6 mg, 20 mol%) in DCE (6 mL) at 85 °C for 8 h, affords 120 mg (92%) of **3f** (PE/EA = 4:1) as a black solid. Mp: 176-177 °C. <sup>1</sup>H NMR (400 MHz, CDCl<sub>3</sub>) δ 11.76 (s, 1H), 9.07 (s, 1H), 8.49 (d, *J* = 8.4 Hz, 1H), 7.92-7.87 (m, 2H), 7.56-7.44 (m, 4H), 7.26 (d, *J* = 3.6 Hz, 1H), 7.07-7.02 (m, 1H), 6.56-6.54 (m, 1H), 3.91 (s, 3H). <sup>13</sup>C NMR (101 MHz, CDCl<sub>3</sub>) δ 165.24, 161.52, 159.03, 151.88 (d, *J*<sub>C-F</sub> = 54.5 Hz), 150.00, 138.50 (d, *J*<sub>C-F</sub> = 20.1 Hz), 134.72, 131.95, 131.83 (d, *J*<sub>C-F</sub> = 40.6 Hz), 130.57 (d, *J*<sub>C-F</sub> = 7.8 Hz), 128.75, 127.15, 118.69 (d, *J*<sub>C-F</sub> = 10.5 Hz), 118.04 (d, *J*<sub>C-F</sub> = 12.7 Hz), 111.37, 111.14, 101.62 (d, *J*<sub>C-F</sub> = 39.5 Hz), 31.21. HRMS *m/z* (ESI) calcd for C<sub>20</sub>H<sub>15</sub>FN<sub>4</sub>O [M+H]<sup>+</sup>: 347.1303, found: 347.1311.

***N*-(2-(7-methyl-7*H*-pyrrolo[2,3-*d*]pyrimidin-4-yl)-4-(trifluoromethyl)phenyl)benzamide (**3g**)**

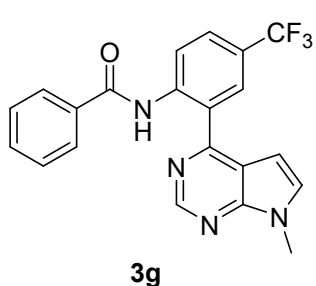

The reaction of 7-methyl-4-(3-(trifluoromethyl)phenyl)-7*H*-pyrrolo[2,3-*d*]pyrimidine (25 mg, 0.09 mmol), benzoyl azide (0.18 mmol), [RuCl<sub>2</sub>(*p*-cymene)]<sub>2</sub> (2 mg, 4 mol%), AgNTf<sub>2</sub> (6 mg, 16 mol%) and NaOAc (1 mg, 20 mol%) in DCE (1 mL) at 85 °C for 8 h, affords 21 mg (57%) of **3g** (PE/EA = 4:1) as a yellow solid. Mp: 183-184 °C. <sup>1</sup>H NMR (400 MHz, CDCl<sub>3</sub>) δ 13.23 (s, 1H), 9.01 (d, *J* = 8.9 Hz, 2H), 8.31 (d, *J* = 1.5 Hz, 1H), 8.10-7.95 (m, 2H), 7.81-7.79 (m, 1H), 7.65-7.47 (m, 3H), 7.36 (d, *J* = 3.6 Hz, 1H), 6.81 (d, *J* = 3.6 Hz, 1H), 3.96 (s, 3H). <sup>13</sup>C NMR (101 MHz, CDCl<sub>3</sub>) δ 165.73, 155.86, 152.15, 149.44, 141.34, 134.86, 132.07, 131.34, 128.77, 127.87 (d, *J*<sub>C-F</sub> = 162.6 Hz), 127.71 (d, *J*<sub>C-F</sub> = 2.0 Hz), 127.39, 125.04 (d, *J*<sub>C-F</sub> = 33.3 Hz), 124.30, 124.10 (d, *J*<sub>C-F</sub> = 272.7 Hz), 122.00, 116.31, 100.58, 31.37. HRMS *m/z* (ESI) calcd for C<sub>21</sub>H<sub>15</sub>F<sub>3</sub>N<sub>4</sub>O [M+H]<sup>+</sup>: 419.1090, found: 419.1095.

***N*-(4-chloro-2-(7-methyl-7*H*-pyrrolo[2,3-*d*]pyrimidin-4-yl)phenyl)benzamide (**3h**)**

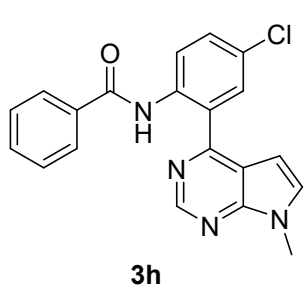

The reaction of 4-(3-chlorophenyl)-7-methyl-7*H*-pyrrolo[2,3-*d*]pyrimidine (85 mg, 0.35 mmol), benzoyl azide (0.70 mmol), [RuCl<sub>2</sub>(*p*-cymene)]<sub>2</sub> (9 mg, 4 mol%), AgNTf<sub>2</sub> (22 mg, 16 mol%) and NaOAc (6 mg, 20 mol%) in DCE (5 mL) at 85 °C for 8 h, affords 76 mg (60%) of **3h** (PE/EA = 4:1) as a yellow solid. Mp: 191-192 °C. <sup>1</sup>H NMR (400 MHz, CDCl<sub>3</sub>) δ 12.92 (s, 1H), 8.99 (s, 1H), 8.80 (d, *J* = 8.9 Hz, 1H), 8.07-7.92 (m, 3H), 7.56-7.48 (m, 4H), 7.32 (d, *J* = 3.6 Hz, 1H), 6.81 (d, *J* = 3.6 Hz, 1H), 3.93 (s, 3H). <sup>13</sup>C NMR (101 MHz, CDCl<sub>3</sub>) δ 165.40, 155.77, 152.09, 149.48, 136.89, 135.06, 131.83, 131.11, 130.69, 130.19, 128.70, 128.30, 127.28, 125.95, 123.48, 116.25, 100.68, 31.33. HRMS *m/z* (ESI) calcd for C<sub>20</sub>H<sub>15</sub>ClN<sub>4</sub>O [M+H]<sup>+</sup>: 385.0827, found: 385.0830.

### *N*-(2-(7-methyl-7*H*-pyrrolo[2,3-*d*]pyrimidin-4-yl)-5-phenoxyphenyl)benzamide

(3i)

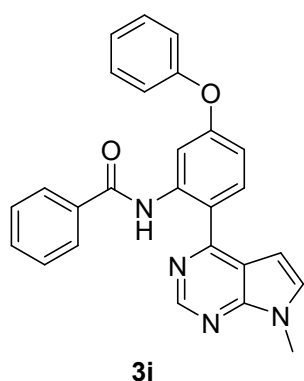

The reaction of 7-methyl-4-(4-phenoxyphenyl)-7*H*-pyrrolo[2,3-*d*]pyrimidine (96 mg, 0.32 mmol), benzoyl azide (0.64 mmol), [RuCl<sub>2</sub>(*p*-cymene)]<sub>2</sub> (8 mg, 4 mol%), AgNTf<sub>2</sub> (20 mg, 16 mol%) and NaOAc (5 mg, 20 mol%) in DCE (5 mL) at 85 °C for 8 h, affords 93 mg (70%) of **3i** (PE/EA = 4:1) as a brown solid. Mp: 138-141 °C. <sup>1</sup>H NMR (400 MHz, CDCl<sub>3</sub>) δ 13.29 (s, 1H), 8.97 (s, 1H), 8.59 (s, 1H), 8.02 (t, *J* = 7.4 Hz, 3H), 7.57-7.49 (m, 3H), 7.46-7.38 (m, 2H), 7.28 (d, *J* = 3.0 Hz, 1H), 7.23-7.16 (m, 3H), 6.91-6.85 (m, 1H), 6.81 (t, *J* = 3.0 Hz, 1H), 3.93 (s, 3H). <sup>13</sup>C NMR (101 MHz, CDCl<sub>3</sub>) δ 165.57, 159.84, 157.07, 156.09, 151.89, 149.48, 140.20, 135.29, 132.18, 131.77, 130.43, 129.95, 128.68, 127.36, 124.16, 119.89, 119.23, 115.94, 112.81, 111.46, 100.99, 31.32. HRMS *m/z* (ESI) calcd for C<sub>26</sub>H<sub>20</sub>N<sub>4</sub>O<sub>2</sub> [M+Na]<sup>+</sup>: 443.1478, found: 443.1468.

### *N*-(1-(7-methyl-7*H*-pyrrolo[2,3-*d*]pyrimidin-4-yl)naphthalen-2-yl)benzamide (3j)

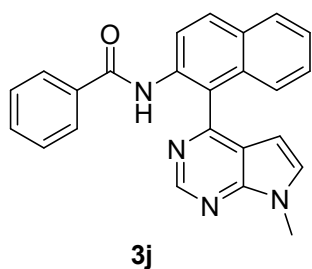

The reaction of 7-methyl-4-(naphthalen-1-yl)-7*H*-pyrrolo[2,3-*d*]pyrimidine (65 mg, 0.25 mmol), benzoyl azide (0.50 mmol), [RuCl<sub>2</sub>(*p*-cymene)]<sub>2</sub> (6 mg, 4 mol%), AgNTf<sub>2</sub> (15 mg, 16 mol%) and NaOAc (4 mg, 20 mol%) in DCE (4 mL) at 85 °C for 8 h, affords 71 mg (76%) of **3j** (PE/EA = 4:1) as a brown solid. Mp: 182-183 °C. <sup>1</sup>H NMR (400 MHz, CDCl<sub>3</sub>) δ 9.10 (s, 1H), 8.72 (t, *J* = 5.6 Hz, 1H), 7.98-7.91 (m, 2H), 7.89 (d, *J* = 8.2 Hz, 1H), 7.58-7.53 (m, 1H), 7.43-7.38 (m, 1H), 7.35 (d, *J* = 8.5 Hz, 1H), 7.30-7.26 (m, 2H), 7.19 (t, *J* = 7.7 Hz, 2H), 7.12 (d, *J* = 3.6 Hz, 1H), 7.01 (t, *J* = 7.4 Hz, 1H), 6.12 (d, *J* = 3.6 Hz, 1H), 3.89 (s, 3H). <sup>13</sup>C NMR (101 MHz, CDCl<sub>3</sub>) δ 166.89, 157.36, 151.06, 137.88, 134.24, 133.85, 132.59, 131.13, 130.79, 129.70, 129.68, 128.80, 128.31, 127.32, 127.17, 126.46, 125.43, 124.25, 119.75, 119.71, 100.21, 31.19. HRMS *m/z* (ESI) calcd for C<sub>24</sub>H<sub>18</sub>N<sub>4</sub>O [M+H]<sup>+</sup>: 379.1553, found: 379.1546.

***N*-2-(7-methyl-7*H*-pyrrolo[2,3-*d*]pyrimidin-4-yl)phenyl)-4-(trifluoromethyl)benzamide (**3k**)**

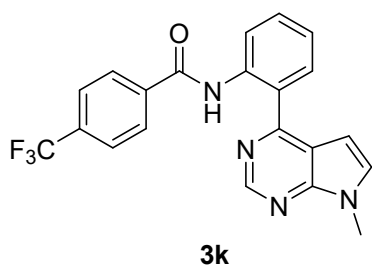

The reaction of 7-methyl-4-phenyl-7*H*-pyrrolo[2,3-*d*]pyrimidine (84 mg, 0.40 mmol), 4-(trifluoromethyl)benzoyl azide (0.80 mmol), [RuCl<sub>2</sub>(*p*-cymene)]<sub>2</sub> (10 mg, 4 mol%), AgNTf<sub>2</sub> (25 mg, 16 mol%) and NaOAc (7 mg, 20 mol%) in DCE (8 mL) at 85 °C for 8 h, affords 125 mg (79%) of **3k** (PE/EA = 3:1) as a white solid. Mp: 110-112 °C. <sup>1</sup>H NMR (400 MHz, DMSO-*d*<sub>6</sub>) δ 12.86 (s, 1H), 9.03 (s, 1H), 8.55-8.53 (m, 1H), 8.05-7.98 (m, 3H), 7.68 (d, *J* = 3.6 Hz, 1H), 7.57-7.52 (m, 3H), 7.34-7.30 (m, 1H), 6.76 (d, *J* = 3.6 Hz, 1H), 3.83 (s, 3H). <sup>13</sup>C NMR (101 MHz, DMSO-*d*<sub>6</sub>) δ 163.51, 156.22, 151.83, 151.12 (d, *J*<sub>C-F</sub> = 7.04 Hz), 149.87, 137.84, 133.96, 132.60, 131.29, 131.08, 129.82, 125.62, 124.47, 122.39, 121.43, 115.93, 100.35, 31.36. HRMS *m/z* (ESI) calcd for C<sub>21</sub>H<sub>15</sub>F<sub>3</sub>N<sub>4</sub>O [M+H]<sup>+</sup>: 397.1271, found: 397.1280.

***N*-2-(7-methyl-7*H*-pyrrolo[2,3-*d*]pyrimidin-4-yl)phenyl)thiophene-2-carboxamide (**3l**)**

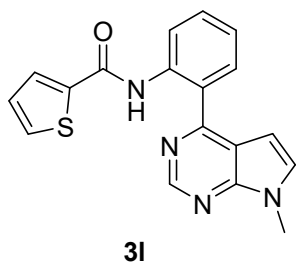

The reaction of 7-methyl-4-phenyl-7*H*-pyrrolo[2,3-*d*]pyrimidine (188 mg, 0.90 mmol), thiophene-2-carbonyl azide (1.80 mmol), [RuCl<sub>2</sub>(*p*-cymene)]<sub>2</sub> (22 mg, 4 mol%), AgNTf<sub>2</sub> (56 mg, 16 mol%) and NaOAc (15 mg, 20 mol%) in DCE (13 mL) at 85 °C for 8 h, affords 262 mg (87%) of **3l** (PE/EA = 3:1) as a white solid. Mp: 155-156 °C. <sup>1</sup>H NMR (400 MHz, DMSO-*d*<sub>6</sub>) δ 12.79 (s, 1H), 9.07 (s, 1H), 8.48-8.46 (m, 1H), 8.05-8.02 (m, 1H), 7.88-7.87 (m, 1H), 7.78-7.77 (m, 1H), 7.73 (d, *J* = 3.5 Hz, 1H), 7.59-7.55 (m, 1H), 7.36-7.32 (m, 1H), 7.25-7.23 (m, 1H), 6.81 (d, *J* = 3.6 Hz, 1H), 3.87 (s, 3H). <sup>13</sup>C NMR (101 MHz, DMSO-*d*<sub>6</sub>) δ 159.69, 156.23, 151.87, 149.87, 140.19, 137.68, 132.76, 132.41, 131.35, 131.19, 129.30, 128.99, 125.30, 124.41, 122.34, 115.98, 100.39, 31.47. HRMS *m/z* (ESI) calcd for C<sub>18</sub>H<sub>14</sub>N<sub>4</sub>OS [M+H]<sup>+</sup>: 335.0961, found: 335.0956.

**2-(4-chlorophenyl)-N-(2-(7-methyl-7H-pyrrolo[2,3-d]pyrimidin-4-yl)phenyl)acetamide (3m)**

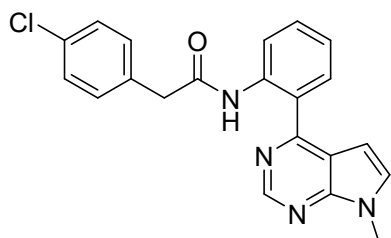

**3m**

The reaction of 7-methyl-4-phenyl-7H-pyrrolo[2,3-d]pyrimidine (42 mg, 0.20 mmol), 2-(4-chlorophenyl)acetyl azide (0.40 mmol), [RuCl<sub>2</sub>(*p*-cymene)]<sub>2</sub> (5 mg, 4 mol%), AgNTf<sub>2</sub> (12 mg, 16 mol%) and NaOAc (3 mg, 20 mol%) in DCE (3 mL) at 85 °C for 8 h, affords 38 mg (50%) of **3m** (PE/EA = 4:1) as a white solid. Mp: 169-170 °C. <sup>1</sup>H NMR (400 MHz, CDCl<sub>3</sub>) δ 11.45 (s, 1H), 8.51 (d, *J* = 9.1 Hz, 2H), 7.83 (d, *J* = 7.8 Hz, 1H), 7.46 (t, *J* = 8.0 Hz, 1H), 7.32 (s, 1H), 7.28-7.19 (m, 5H), 6.68 (d, *J* = 3.5 Hz, 1H), 3.91 (s, 3H), 3.69 (s, 2H). <sup>13</sup>C NMR (101 MHz, CDCl<sub>3</sub>) δ 169.39, 156.93, 151.77, 149.59, 137.20, 133.36, 132.93, 131.17, 130.72, 130.61, 130.49, 129.03, 125.14, 123.68, 122.51, 116.27, 100.81, 44.72, 31.36. HRMS *m/z* (ESI) calcd for C<sub>21</sub>H<sub>17</sub>ClN<sub>4</sub>O [M+H]<sup>+</sup>: 377.1164, found: 377.1168.

**N-(2-(7-methyl-7H-pyrrolo[2,3-d]pyrimidin-4-yl)phenyl)-2-naphthamide(3n)**

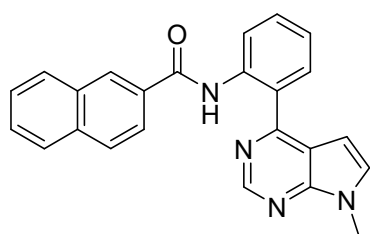

**3n**

The reaction of 7-methyl-4-phenyl-7H-pyrrolo[2,3-d]pyrimidine (67 mg, 0.32 mmol), 2-naphthoyl azide (0.64 mmol), [RuCl<sub>2</sub>(*p*-cymene)]<sub>2</sub> (8 mg, 4 mol%), AgNTf<sub>2</sub> (20 mg, 16 mol%) and NaOAc (5 mg, 20 mol%) in DCE (5 mL) at 85 °C for 10 h, affords 56 mg (47%) of **3n** (PE/EA = 2:1) as a yellow solid. Mp: 189-191 °C. <sup>1</sup>H NMR (400 MHz, DMSO-*d*<sub>6</sub>) δ 11.92 (s, 1H), 8.74 (s, 1H), 8.44 (d, *J* = 8.2 Hz, 1H), 8.23 (d, *J* = 8.4 Hz, 1H), 8.08 (d, *J* = 8.2 Hz, 1H), 8.01-7.95 (m, 2H), 7.75-7.69 (m, 2H), 7.64-7.52 (m, 4H), 7.42 (t, *J* = 7.6 Hz, 1H), 6.76 (d, *J* = 3.3 Hz, 1H), 3.85 (s, 3H). <sup>13</sup>C NMR (101 MHz, DMSO-*d*<sub>6</sub>) δ 167.08, 156.67, 151.73, 150.09, 137.43, 134.60, 133.78, 132.38, 131.30, 131.19, 130.90, 130.13, 128.80, 127.72, 127.38, 126.88, 125.90, 125.66, 125.56, 125.03, 123.64, 116.27, 100.30, 31.41. HRMS *m/z* (ESI) calcd for C<sub>24</sub>H<sub>18</sub>N<sub>4</sub>O [M+H]<sup>+</sup>: 379.1553, found: 379.1552.

**2-((2-(7-methyl-7H-pyrrolo[2,3-d]pyrimidin-4-yl)phenyl)carbamoyl)phenyl**



**acetate (3o)**

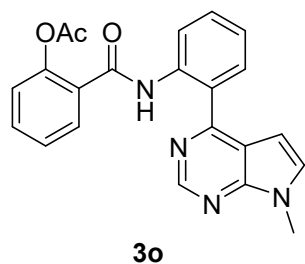

The reaction of 7-methyl-4-phenyl-7H-pyrrolo[2,3-d]pyrimidine (42 mg, 0.20 mmol), 2-(azidocarbonyl)phenyl acetate (0.40 mmol), [RuCl<sub>2</sub>(*p*-cymene)]<sub>2</sub> (5 mg, 4 mol%), AgNTf<sub>2</sub> (12 mg, 16 mol%) and NaOAc (3 mg, 20 mol%) in DCE (3 mL) at 85 °C for 8 h, affords 48 mg (62%) of **3o** (PE/EA = 2:1) as a black solid. Mp: 187-188 °C. <sup>1</sup>H NMR (400 MHz, DMSO-*d*<sub>6</sub>) δ 12.14 (s, 1H), 8.87 (s, 1H), 8.45 (d, *J* = 8.2 Hz, 1H), 7.98 (d, *J* = 7.8 Hz, 1H), 7.75-7.71 (m, 2H), 7.62-7.57 (m, 2H), 7.44-7.35 (m, 2H), 7.26 (d, *J* = 8.1 Hz, 1H), 6.79 (d, *J* = 3.6 Hz, 1H), 3.87 (s, 3H), 2.07 (s, 3H). <sup>13</sup>C NMR (101 MHz, DMSO-*d*<sub>6</sub>) δ 169.35, 163.63, 156.27, 151.85, 149.94, 148.46, 137.35, 132.70, 131.29, 131.03, 129.51, 129.29, 126.81, 126.28, 124.73, 124.18, 122.80, 116.11, 100.25, 31.45, 20.94. HRMS *m/z* (ESI) calcd for C<sub>22</sub>H<sub>18</sub>N<sub>4</sub>O<sub>3</sub> [M+H]<sup>+</sup>: 387.1452, found: 387.1446.

### diphenyl (2-(7-methyl-7H-pyrrolo[2,3-d]pyrimidin-4-yl)phenyl)phosphoramidate

#### (5aa)

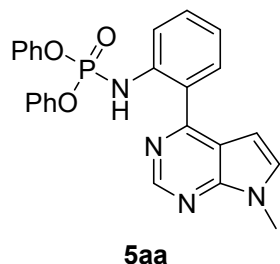

The reaction of 7-methyl-4-phenyl-7H-pyrrolo[2,3-d]pyrimidine (142 mg, 0.68 mmol), diphenyl phosphorazidate (1.36 mmol), [RuCl<sub>2</sub>(*p*-cymene)]<sub>2</sub> (17 mg, 4 mol%), AgNTf<sub>2</sub> (42 mg, 16 mol%) and NaOAc (11 mg, 20 mol%) in DCE (10 mL) at 85 °C for 8 h, affords 234 mg (76%) of **5aa** (PE/EA = 4:1) as a yellow oil. <sup>1</sup>H NMR (400 MHz, DMSO-*d*<sub>6</sub>) δ 11.12 (d, *J* = 11.5 Hz, 1H), 8.83 (s, 1H), 8.03 (d, *J* = 7.9 Hz, 1H), 7.75 (d, *J* = 3.6 Hz, 1H), 7.71 (d, *J* = 7.2 Hz, 1H), 7.59-7.54 (m, 1H), 7.36-7.31 (m, 4H), 7.27-7.20 (m, 5H), 7.20-7.15 (m, 2H), 6.82 (d, *J* = 3.6 Hz, 1H), 3.36 (s, 3H). <sup>13</sup>C NMR (101 MHz, DMSO-*d*<sub>6</sub>) δ 155.97, 151.72, 150.43 (d, *J*<sub>C-P</sub> = 2.8 Hz), 149.35, 139.37, 132.75, 131.78, 131.59, 130.47, 125.89, 123.58, 123.48, 122.81, 120.53 (d, *J*<sub>C-P</sub> = 1.9 Hz), 119.78, 115.51, 100.55, 31.48. <sup>31</sup>P NMR (162 MHz, DMSO-*d*<sub>6</sub>) δ -7.85 (s, 1P). HRMS *m/z* (ESI): calcd for C<sub>25</sub>H<sub>21</sub>N<sub>4</sub>O<sub>3</sub>P [M+Na]<sup>+</sup>: 479.1243, found: 479.1250.

### diphenyl (2-(7-benzyl-7H-pyrrolo[2,3-d]pyrimidin-4-yl)phenyl)phosphoramidate

#### (5ab)

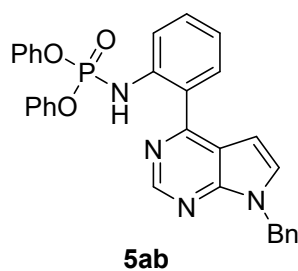

The reaction of 7-benzyl-4-phenyl-7H-pyrrolo[2,3-d]pyrimidine (143 mg, 0.50 mmol), diphenyl phosphorazidate (1.00 mmol), [RuCl<sub>2</sub>(*p*-cymene)]<sub>2</sub> (12 mg, 4 mol%), AgNTf<sub>2</sub> (31 mg, 16 mol%) and NaOAc (8 mg, 20 mol%) in DCE (8 mL) at 85 °C for 9 h, affords 200 mg (75%) of **5ab** (PE/EA = 4:1) as a yellow oil. <sup>1</sup>H NMR (400 MHz, DMSO-*d*<sub>6</sub>) δ 10.98 (d, *J* = 11.3 Hz, 1H), 8.85 (d, *J* = 4.4 Hz, 1H), 8.02 (t, *J* = 6.5 Hz, 1H), 7.88 (d, *J* = 4.4 Hz, 1H), 7.71 (d, *J* = 8.5 Hz, 1H), 7.57 (t, *J* = 6.9 Hz, 1H), 7.40-7.25 (m, 10H), 7.15-7.05 (m, 5H), 7.11 (t, *J* = 6.7 Hz, 2H), 6.85 (d, *J* = 4.8 Hz, 1H), 5.55 (s, 2H). <sup>13</sup>C NMR (101 MHz, DMSO-*d*<sub>6</sub>) δ 156.24, 151.52, 150.41 (d, *J*<sub>C-P</sub> = 2.8 Hz), 149.64, 139.30, 137.93, 131.82 (d, *J*<sub>C-P</sub> = 1.3 Hz), 131.61, 130.41, 129.14, 128.17, 128.03, 125.84, 123.75, 123.66, 122.90, 120.53 (d, *J*<sub>C-P</sub> = 1.9 Hz), 119.95, 115.68, 101.24, 47.89. <sup>31</sup>P NMR (162 MHz,

DMSO-*d*<sub>6</sub>) δ -7.77 (s, 1P). HRMS *m/z* (ESI): calcd for C<sub>31</sub>H<sub>25</sub>N<sub>4</sub>O<sub>3</sub>P [M+H]<sup>+</sup>: 533.1737, found: 533.1746.

**diphenyl (2-(7-((2-(trimethylsilyl)ethoxy)methyl)-7*H*-pyrrolo[2,3-*d*]pyrimidin-4-yl)phenyl)phosphoramidate (5ac)**

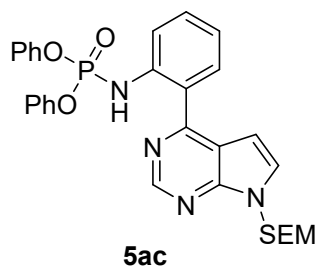

The reaction of 4-phenyl-7-((2-(trimethylsilyl)ethoxy)methyl)-7*H*-pyrrolo[2,3-*d*]pyrimidine (192 mg, 0.59 mmol), diphenyl phosphorazidate (1.18 mmol), [RuCl<sub>2</sub>(*p*-cymene)]<sub>2</sub> (14 mg, 4 mol%), AgNTf<sub>2</sub> (37 mg, 16 mol%) and NaOAc (10 mg, 20 mol%) in DCE (9 mL) at 85 °C for 8 h, affords 277 mg (82%) of **5ac** (PE/EA = 4:1) as a yellow liquid. <sup>1</sup>H NMR (400 MHz, CDCl<sub>3</sub>) δ 10.95 (d, *J* = 11.3 Hz, 1H), 8.87 (s, 1H), 8.03-8.00(m, 1H), 7.88 (d, *J* = 3.7 Hz, 1H), 7.73-7.71 (m, 1H), 7.59-7.55 m,1H), 7.33 (d, *J* = 7.9 Hz, 3H), 7.24-7.19 (m, 5H), 7.18-7.13 (m, 2H), 6.87 (d, *J* = 3.7 Hz, 1H), 5.69 (s, 2H), 3.59-3.54 (m, 2H), 2.53-2.48 (m, 2H), 0.87-0.83 (m, 2H), -0.09 (s, 9H). <sup>13</sup>C NMR (101 MHz, CDCl<sub>3</sub>) δ 161.17, 157.09, 155.18 (d, *J*<sub>C-P</sub> = 2.8 Hz), 144.07, 136.63 (d, *J*<sub>C-P</sub> = 2.6 Hz), 136.37, 135.16, 130.60, 128.38, 128.28, 127.64, 125.29 (d, *J*<sub>C-P</sub> = 1.9 Hz), 124.68, 120.56, 106.49, 77.74, 71.05, 22.37, 3.79. <sup>31</sup>P NMR (162 MHz, CDCl<sub>3</sub>) δ -7.82 (s, 1P). HRMS *m/z* (ESI): calcd for C<sub>30</sub>H<sub>33</sub>N<sub>4</sub>O<sub>4</sub>PSi [M+H]<sup>+</sup>: 573.2081, found: 573.2072.

**diphenyl (2-(7-tosyl-7*H*-pyrrolo[2,3-*d*]pyrimidin-4-yl)phenyl)phosphoramidate (5ad)**

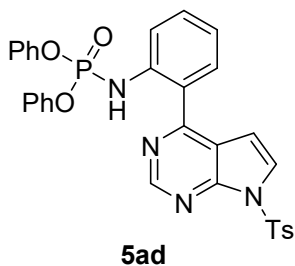

The reaction of 4-phenyl-7-tosyl-7*H*-pyrrolo[2,3-*d*]pyrimidine (84 mg, 0.24 mmol), diphenyl phosphorazidate (0.48 mmol), [RuCl<sub>2</sub>(*p*-cymene)]<sub>2</sub> (6 mg, 4 mol%), AgNTf<sub>2</sub> (15 mg, 16 mol%) and NaOAc (4 mg, 20 mol%) in DCE (4 mL) at 85 °C for 9 h, affords 120 mg (83%) of **5ad** (PE/EA = 2:1) as a white solid. Mp: 148-150 °C. <sup>1</sup>H NMR (400 MHz, DMSO-*d*<sub>6</sub>) δ 9.78 (t, *J* = 9.1 Hz, 1H), 9.01-8.93 (m, 1H), 8.13 (d, *J* = 8.5 Hz, 2H), 8.07-8.01 (m, 1H), 7.77-7.62 (m, 2H), 7.59-7.45 (m, 3H), 7.26-7.11 (m, 9H), 7.03 (t, *J* = 7.5 Hz, 2H), 6.88-

6.79 (m, 1H), 2.37 (s, 3H).  $^{13}\text{C}$  NMR (101 MHz, DMSO- $d_6$ )  $\delta$  157.96, 151.88, 151.73, 150.34 (d,  $J_{\text{C-P}} = 2.7$  Hz), 146.85, 138.65, 134.52, 132.15, 131.79, 130.75, 130.30, 128.47, 128.22, 125.75, 124.34 (d,  $J_{\text{C-P}} = 4.1$  Hz), 123.29, 120.61, 120.47 (d,  $J_{\text{C-P}} = 1.9$  Hz), 118.30, 105.45, 21.61.  $^{31}\text{P}$  NMR (162 MHz, DMSO- $d_6$ )  $\delta$  -7.55 (s, 1P). HRMS  $m/z$  (ESI): calcd for  $\text{C}_{31}\text{H}_{25}\text{N}_4\text{O}_5\text{PS}$   $[\text{M}+\text{H}]^+$ : 597.1356, found: 597.1370.

#### diphenyl (2-(7H-pyrrolo[2,3-d]pyrimidin-4-yl)phenyl)phosphoramidate (**5ae**)

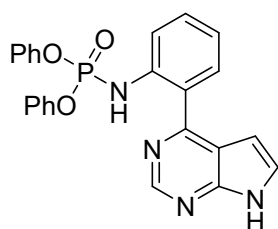

**5ae**

The reaction of 4-phenyl-7H-pyrrolo[2,3-d]pyrimidine (42 mg, 0.20 mmol), diphenyl phosphorazidate (0.40 mmol),  $[\text{RuCl}_2(p\text{-cymene})]_2$  (5 mg, 4 mol%),  $\text{AgNTf}_2$  (12 mg, 16 mol%) and NaOAc (3 mg, 20 mol%) in DCE (3 mL) at 85 °C for 9 h, affords 22 mg (25%) of **5ae** (PE/EA = 2:1) as a white solid. Mp: 171-172 °C.  $^1\text{H}$  NMR (400 MHz, DMSO- $d_6$ )  $\delta$  12.46 (s, 1H), 11.16 (d,  $J = 11.6$  Hz, 1H), 8.79 (s, 1H), 8.07-8.03 (m, 1H), 7.73-7.71 (m, 1H), 7.58-7.54 (m, 1H), 7.36-7.31 (m, 5H), 7.25-7.20 (m, 5H), 7.19-7.15 (m, 2H), 6.82-6.80 (m, 1H).  $^{13}\text{C}$  NMR (101 MHz, DMSO- $d_6$ )  $\delta$  155.91, 152.97, 150.42, 150.35, 149.43, 139.33, 131.70 (d,  $J_{\text{C-P}} = 17.1$  Hz), 130.46, 128.84, 125.90, 123.70 (d,  $J_{\text{C-P}} = 16.0$  Hz), 122.79, 120.55 (d,  $J_{\text{C-P}} = 7.7$  Hz), 119.72, 115.30, 101.23.  $^{31}\text{P}$  NMR (162 MHz, DMSO- $d_6$ )  $\delta$  -7.83 (s, 1P). HRMS  $m/z$  (ESI) calcd for  $\text{C}_{24}\text{H}_{19}\text{N}_4\text{O}_3\text{P}$   $[\text{M}+\text{H}]^+$ : 443.1268, found: 443.1257.

#### diphenyl (5-methyl-2-(7-((2-(trimethylsilyl)ethoxy)methyl)-7H-pyrrolo[2,3-d]pyrimidin-4-yl)phenyl)phosphoramidate (**5bc**)

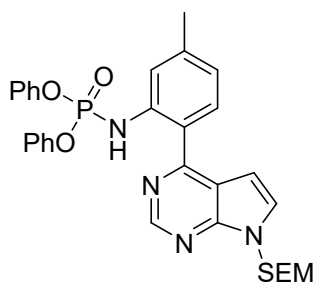

**5bc**

The reaction of 4-(*p*-tolyl)-7-((2-(trimethylsilyl)ethoxy)methyl)-7H-pyrrolo[2,3-d]pyrimidine (64 mg, 0.19 mmol), diphenyl phosphorazidate (0.38 mmol),  $[\text{RuCl}_2(p\text{-cymene})]_2$  (5 mg, 4 mol%),  $\text{AgNTf}_2$  (12 mg, 16 mol%) and NaOAc (3 mg, 20 mol%) in DCE (3 mL) at 85 °C for 8 h, affords 96 mg (86%) of **5bc** (PE/EA = 4:1) as a yellow solid. Mp: 82-83 °C.  $^1\text{H}$  NMR (400 MHz,  $\text{CDCl}_3$ )  $\delta$  11.17 (d,

$J = 11.8$  Hz, 1H), 8.78 (s, 1H), 7.92-7.88 (m, 1H), 7.66 (s, 1H), 7.44 (d,  $J = 3.7$  Hz, 1H), 7.27 (d,  $J = 3.5$  Hz, 8H), 7.15-7.09 (m, 2H), 7.02-6.98 (m, 1H), 6.84 (d,  $J = 3.7$  Hz, 1H), 5.70 (s, 2H), 3.62-3.56 (m, 2H), 2.47 (s, 3H), 1.00-0.94 (m, 2H), -0.01 (s, 9H).  $^{13}\text{C}$  NMR (101 MHz,  $\text{CDCl}_3$ )  $\delta$  157.36, 152.31, 150.60 (d,  $J_{\text{C-P}} = 11.2$  Hz), 149.82, 141.91, 139.78, 130.97, 129.70, 128.86, 125.19, 125.17, 122.84, 120.77, 120.68, 120.45 (d,  $J_{\text{C-P}} = 7.7$  Hz), 115.55, 102.37, 72.90, 66.68, 21.87, 17.78, -1.37.  $^{31}\text{P}$  NMR (162 MHz,  $\text{CDCl}_3$ )  $\delta$  -7.67 (s, 1P). HRMS  $m/z$  (ESI) calcd for  $\text{C}_{31}\text{H}_{35}\text{N}_4\text{O}_4\text{PSi}$   $[\text{M}+\text{H}]^+$ : 587.2238, found: 587.2246.

**diphenyl (5-methoxy-2-(7-((2-(trimethylsilyl)ethoxy)methyl)-7H-pyrrolo[2,3-d]pyrimidin-4-yl)phenyl)phosphoramidate (5cc)**

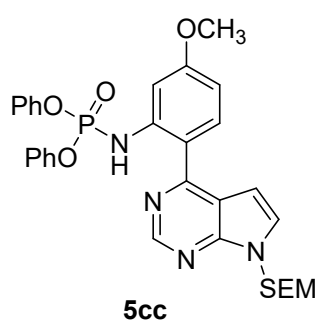

The reaction of 4-(4-methoxyphenyl)-7-((2-(trimethylsilyl)ethoxy)methyl)-7H-pyrrolo[2,3-d]pyrimidine (71 mg, 0.20 mmol), diphenyl phosphorazidate (0.40 mmol),  $[\text{RuCl}_2(p\text{-cymene})_2]$  (5 mg, 4 mol%),  $\text{AgNTf}_2$  (12 mg, 16 mol%) and  $\text{NaOAc}$  (3 mg, 20 mol%) in DCE (3 mL) at 85 °C for 8 h, affords 98 mg (81%) of **5cc** (PE/EA = 4:1) as a yellow solid. Mp: 59-62 °C.  $^1\text{H}$  NMR (400 MHz,  $\text{CDCl}_3$ )  $\delta$  11.59 (d,  $J = 11.9$  Hz, 1H), 8.75 (s, 1H), 7.99-7.96 (m, 1H), 7.43 (d,  $J = 3.7$  Hz, 1H), 7.39 (d,  $J = 2.5$  Hz, 1H), 7.28 (d,  $J = 4.3$  Hz, 8H), 7.15-7.10 (m, 2H), 6.85 (d,  $J = 3.8$  Hz, 1H), 6.75-6.72 (m, 1H), 5.70 (s, 2H), 3.91 (s, 3H), 3.61-3.56 (m, 2H), 0.99-0.93 (m, 2H), -0.02 (s, 9H).  $^{13}\text{C}$  NMR (101 MHz,  $\text{CDCl}_3$ )  $\delta$  161.91, 157.27, 152.19, 150.55 (d,  $J_{\text{C-P}} = 11.3$  Hz), 149.74, 141.94, 132.40, 129.72, 128.62, 125.23 (d,  $J_{\text{C-P}} = 2.2$  Hz), 120.46 (d,  $J_{\text{C-P}} = 7.5$  Hz), 116.15 (d,  $J_{\text{C-P}} = 15.9$  Hz), 115.04, 108.24, 104.72 (d,  $J_{\text{C-P}} = 4.1$  Hz), 102.37, 72.88, 66.67, 55.46, 17.77, -1.39.  $^{31}\text{P}$  NMR (162 MHz,  $\text{CDCl}_3$ )  $\delta$  -7.90 (s, 1P). HRMS  $m/z$  (ESI) calcd for  $\text{C}_{31}\text{H}_{35}\text{N}_4\text{O}_5\text{PSi}$   $[\text{M}+\text{H}]^+$ : 603.2187, found: 603.2187.

**diphenyl (5-(bromomethyl)-2-(7-((2-(trimethylsilyl)ethoxy)methyl)-7H-pyrrolo[2,3-d]pyrimidin-4-yl)phenyl)phosphoramidate (5dc)**

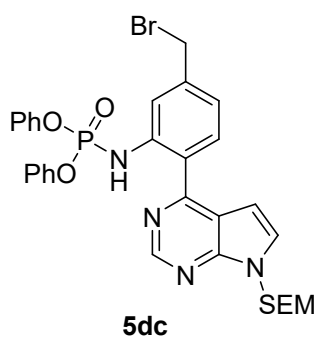

The reaction of 4-(4-(bromomethyl)phenyl)-7-((2-(trimethylsilyl)ethoxy)methyl)-7*H*-pyrrolo[2,3-*d*]pyrimidine (83 mg, 0.20 mmol), diphenyl phosphoramidate (0.40 mmol), [RuCl<sub>2</sub>(*p*-cymene)]<sub>2</sub> (5 mg, 4 mol%), AgNTf<sub>2</sub> (12 mg, 16 mol%) and NaOAc (3 mg, 20 mol%) in DCE (3 mL) at 85 °C for 8 h, affords 98 mg (74%) of **5dc** (PE/EA = 4:1) as a white solid. Mp: 114-116 °C. <sup>1</sup>H NMR (400 MHz, CDCl<sub>3</sub>) δ 11.14 (d, *J* = 11.8 Hz, 1H), 8.77 (s, 1H), 7.96-7.94 (m, 1H), 7.80 (s, 1H), 7.43 (d, *J* = 3.7 Hz, 1H), 7.24 (d, *J* = 4.4 Hz, 8H), 7.17 (d, *J* = 8.1 Hz, 1H), 7.10 (q, *J* = 4.1 Hz, 2H), 6.81 (d, *J* = 3.7 Hz, 1H), 5.69 (s, 2H), 4.76 (s, 2H), 3.61-3.57 (m, 2H), 0.98-0.94 (m, 2H), -0.02 (s, 9H). <sup>13</sup>C NMR (101 MHz, CDCl<sub>3</sub>) δ 157.09 (d, *J*<sub>C-P</sub> = 2.4 Hz), 152.32, 150.50 (d, *J*<sub>C-P</sub> = 11.4 Hz), 149.79, 144.97, 139.83, 131.19, 129.71, 129.06, 125.24 (d, *J*<sub>C-P</sub> = 2.3 Hz), 122.29 (d, *J*<sub>C-P</sub> = 10.6 Hz), 120.44 (d, *J*<sub>C-P</sub> = 7.5 Hz), 120.03, 117.87 (d, *J*<sub>C-P</sub> = 3.5 Hz), 115.71, 102.32, 72.92, 66.74, 64.52 (d, *J*<sub>C-P</sub> = 5.9 Hz), 17.77, -1.39. <sup>31</sup>P NMR (162 MHz, CDCl<sub>3</sub>) δ -7.65 (s, 1P). HRMS *m/z* (ESI) calcd for C<sub>31</sub>H<sub>34</sub>BrN<sub>4</sub>O<sub>4</sub>PSi [M+H]<sup>+</sup>: 665.1343, found: 665.1331.

**diphenyl (5-acetyl-2-(7-((2-(trimethylsilyl)ethoxy)methyl)-7*H*-pyrrolo[2,3-*d*]pyrimidin-4-yl)phenyl)phosphoramidate (5ec)**

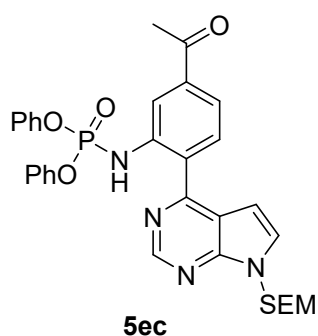

The reaction of 1-(4-(7-((2-(trimethylsilyl)ethoxy)methyl)-7*H*-pyrrolo[2,3-*d*]pyrimidin-4-yl)phenyl)ethan-1-one (40 mg, 0.11 mmol), diphenyl phosphoramidate (0.22 mmol), [RuCl<sub>2</sub>(*p*-cymene)]<sub>2</sub> (3 mg, 4 mol%), AgNTf<sub>2</sub> (7 mg, 16 mol%) and NaOAc (2 mg, 20 mol%) in DCE (2 mL) at 85 °C for 8 h, affords 44 mg (66%) of **5ec** (PE/EA = 4:1) as a yellow solid. Mp: 89-90 °C. <sup>1</sup>H NMR (400 MHz, CDCl<sub>3</sub>) δ 11.01 (d, *J* = 11.6 Hz, 1H), 8.87 (s, 1H), 8.42 (d, *J* = 1.6 Hz, 1H), 8.09-8.06 (m, 1H), 7.77-7.74 (m, 1H), 7.51 (d, *J* = 3.7 Hz, 1H), 7.28-7.27 (m, 3H), 7.27 (s, 5H), 7.18-7.09 (m, 2H), 6.84 (d, *J* = 3.7 Hz, 1H), 5.73 (s, 2H), 3.63-3.58 (m, 2H), 2.68 (s, 3H), 0.99-0.94 (m, 2H), -0.01 (s, 9H). <sup>13</sup>C NMR (101 MHz, CDCl<sub>3</sub>) δ 197.40, 155.97, 152.57, 150.43 (d, *J*<sub>C-P</sub> = 11.3

Hz), 149.94, 140.10, 138.72, 131.21, 129.81 (d,  $J_{C-P} = 6.1$  Hz), 127.23, 127.14, 125.34 (d,  $J_{C-P} = 2.2$  Hz), 121.17, 120.40 (d,  $J_{C-P} = 7.7$  Hz), 119.83 (d,  $J_{C-P} = 3.3$  Hz), 116.14, 101.97, 72.99, 66.83, 26.83, 17.77, -1.39.  $^{31}\text{P}$  NMR (162 MHz,  $\text{CDCl}_3$ )  $\delta$  -8.20 (s, 1P). HRMS  $m/z$  (ESI) calcd for  $\text{C}_{32}\text{H}_{35}\text{N}_4\text{O}_5\text{PSi}$   $[\text{M}+\text{H}]^+$ : 615.2187, found: 615.2190.

**diphenyl (5-(trifluoromethyl)-2-(7-((2-(trimethylsilyl)ethoxy)methyl)-7H-pyrrolo[2,3-d]pyrimidin-4-yl)phenyl)phosphoramidate (5fc)**

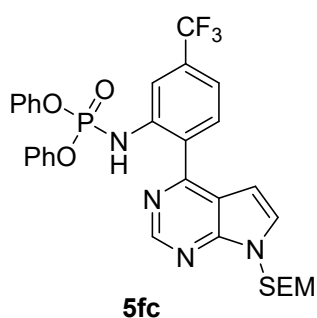

The reaction of 4-(4-(trifluoromethyl)phenyl)-7-((2-(trimethylsilyl)ethoxy)methyl)-7H-pyrrolo[2,3-d]pyrimidine (67 mg, 0.17 mmol), diphenyl phosphorazidate (0.34 mmol),  $[\text{RuCl}_2(p\text{-cymene})]_2$  (4 mg, 4 mol%),  $\text{AgNTf}_2$  (11 mg, 16 mol%) and  $\text{NaOAc}$  (3 mg, 20 mol%) in DCE (3 mL) at 85 °C for 9 h, affords 50 mg (45%) of **5fc** (PE/EA = 4:1) as a yellow solid. Mp: 96-97 °C.  $^1\text{H}$  NMR (400 MHz,  $\text{CDCl}_3$ )  $\delta$  11.10 (d,  $J = 11.6$  Hz, 1H), 8.89 (s, 1H), 8.10 (q,  $J = 3.7, 3.2$  Hz, 2H), 7.52 (d,  $J = 3.7$  Hz, 1H), 7.44-7.42 (m, 1H), 7.31-7.29 (m, 2H), 7.27 (d,  $J = 5.2$  Hz, 5H), 7.24 (d,  $J = 1.4$  Hz, 1H), 7.17-7.12 (m, 2H), 6.83 (d,  $J = 3.7$  Hz, 1H), 5.73 (s, 2H), 3.63-3.58 (m, 2H), 0.99-0.94 (m, 2H), -0.01 (s, 9H).  $^{13}\text{C}$  NMR (101 MHz,  $\text{CDCl}_3$ )  $\delta$  155.74, 152.59, 150.37 (d,  $J_{C-P} = 11.2$  Hz), 149.97, 140.33, 132.91, 132.58, 131.41, 129.86, 129.80, 125.39 (d,  $J_{C-F} = 4.9$  Hz), 120.29 (d,  $J_{C-P} = 7.7$  Hz), 118.18 (d,  $J_{C-F} = 14.3$  Hz), 116.65, 116.05, 101.83, 73.01, 66.87, 17.78, -1.41.  $^{31}\text{P}$  NMR (162 MHz,  $\text{CDCl}_3$ )  $\delta$  -8.68 (s, 1P). HRMS  $m/z$  (ESI) calcd for  $\text{C}_{31}\text{H}_{32}\text{F}_3\text{N}_4\text{O}_4\text{PSi}$   $[\text{M}+\text{H}]^+$ : 641.1955, found: 641.1944.

**diphenyl (4-methyl-2-(7-((2-(trimethylsilyl)ethoxy)methyl)-7H-pyrrolo[2,3-d]pyrimidin-4-yl)phenyl)phosphoramidate (5gc)**

The reaction of 4-(*m*-tolyl)-7-((2-(trimethylsilyl)ethoxy)methyl)-7H-pyrrolo[2,3-d]pyrimidine (61 mg, 0.18 mmol), diphenyl phosphorazidate (0.36 mmol),  $[\text{RuCl}_2(p\text{-cymene})]_2$  (4 mg, 4 mol%),  $\text{AgNTf}_2$  (11 mg, 16 mol%) and  $\text{NaOAc}$  (3 mg, 20 mol%)

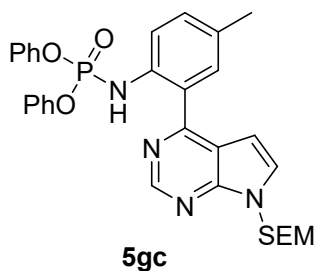

in DCE (3 mL) at 85 °C for 9 h, affords 73 mg (71%) of **5gc** (PE/EA = 4:1) as a yellow oil. <sup>1</sup>H NMR (400 MHz, CDCl<sub>3</sub>) δ 10.72 (d, *J* = 12.1 Hz, 1H), 8.82 (s, 1H), 7.79 (d, *J* = 2.2 Hz, 1H), 7.73 (d, *J* = 8.4 Hz, 1H), 7.46 (d, *J* = 3.7 Hz, 1H), 7.33-7.30 (m, 1H), 7.26 (d, *J* = 3.9 Hz, 4H), 7.25 (s, 4H), 7.14-7.09 (m, 2H), 6.84 (d, *J* = 3.7 Hz, 1H), 5.71 (s, 2H), 3.62-3.57 (m, 2H), 2.43 (s, 3H), 0.99-0.94 (m, 2H), -0.01 (s, 9H). <sup>13</sup>C NMR (101 MHz, CDCl<sub>3</sub>) δ 157.36, 152.42, 150.53, 150.04, 137.02, 131.96, 131.41, 131.22, 129.66, 128.94, 125.12, 120.43 (d, *J*<sub>C-P</sub> = 7.9 Hz), 119.93, 115.80, 102.36, 72.90, 66.72, 20.85, 17.78, -1.40. <sup>31</sup>P NMR (162 MHz, CDCl<sub>3</sub>) δ -7.50 (s, 1P). HRMS *m/z* (ESI) calcd for C<sub>31</sub>H<sub>35</sub>F<sub>3</sub>N<sub>4</sub>O<sub>4</sub>PSi [M+H]<sup>+</sup>: 587.2238, found: 587.2230.

**diphenyl (3-fluoro-2-(7-((2-(trimethylsilyl)ethoxy)methyl)-7H-pyrrolo[2,3-*d*]pyrimidin-4-yl)phenyl)phosphoramidate (**5hc**)**

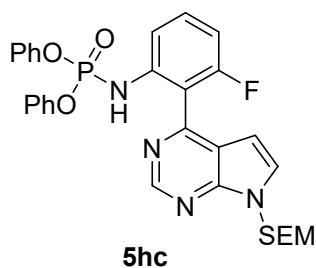

The reaction of 4-(2-fluorophenyl)-7-((2-(trimethylsilyl)ethoxy)methyl)-7H-pyrrolo[2,3-*d*]pyrimidine (93 mg, 0.27 mmol), diphenyl phosphoramidate (0.54 mmol), [RuCl<sub>2</sub>(*p*-cymene)]<sub>2</sub> (7 mg, 4 mol%), AgNTf<sub>2</sub> (17 mg, 16 mol%) and NaOAc (4 mg, 20 mol%) in DCE (4 mL) at 85 °C for 13 h, affords 76 mg (48%) of **5hc** (PE/EA = 4:1) as a yellow oil. <sup>1</sup>H NMR (400 MHz, CDCl<sub>3</sub>) δ 9.38 (d, *J* = 11.5 Hz, 1H), 8.89 (s, 1H), 7.61 (d, *J* = 8.3 Hz, 1H), 7.49-7.44 (m, 1H), 7.42 (d, *J* = 3.8 Hz, 1H), 7.26-7.22 (m, 4H), 7.20-7.16 (m, 4H), 7.14-7.09 (m, 2H), 6.98-6.92 (m, 1H), 6.54-6.51 (m, 1H), 5.71 (s, 2H), 3.64-3.59 (m, 2H), 1.00-0.95 (m, 2H), -0.01 (s, 9H). <sup>13</sup>C NMR (101 MHz, CDCl<sub>3</sub>) δ 161.96, 159.46, 152.24, 151.92, 150.57, 150.29 (d, *J*<sub>C-P</sub> = 11.1 Hz), 140.07, 131.90 (d, *J*<sub>C-P</sub> = 17.1 Hz), 129.72, 128.92 (d, *J*<sub>C-F</sub> = 8.0 Hz), 125.33 (d, *J*<sub>C-F</sub>



= 5.2 Hz), 120.30 (d,  $J_{C-F} = 17.8$  Hz), 118.33 (d,  $J_{C-P} = 3.8$  Hz), 115.50, 109.98 (d,  $J_{C-F} = 85.8$  Hz), 102.83 (d,  $J_{C-F} = 40.0$  Hz), 72.93, 66.78, 17.78, -1.40.  $^{31}\text{P}$  NMR (162 MHz,  $\text{CDCl}_3$ )  $\delta$  -8.28 (s, 1P). HRMS  $m/z$  (ESI) calcd for  $\text{C}_{30}\text{H}_{32}\text{FN}_4\text{O}_4\text{PSi}$   $[\text{M}+\text{H}]^+$ : 591.1987, found: 591.1978.

**diphenyl (3-methoxy-2-(7-tosyl-7H-pyrrolo[2,3-d]pyrimidin-4-yl)phenyl)phosphoramidate (5bd)**

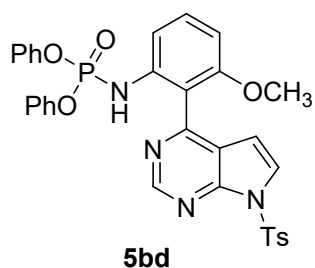

The reaction of 4-(2-methoxyphenyl)-7-((2-(trimethylsilyl)ethoxy)methyl)-7H-pyrrolo[2,3-d]pyrimidine (99 mg, 0.28 mmol), diphenyl phosphoramidate (0.56 mmol),  $[\text{RuCl}_2(p\text{-cymene})]_2$  (7 mg, 4 mol%),  $\text{AgNTf}_2$  (17 mg, 16 mol%) and  $\text{NaOAc}$  (5 mg, 20 mol%) in DCE (4 mL) at 85 °C for 9 h, affords 111 mg (63%) of **5bd** (PE/EA = 2:1) as a yellow oil.  $^1\text{H}$  NMR (400 MHz,  $\text{DMSO-}d_6$ )  $\delta$  9.00 (s, 1H), 8.18-8.12 (m, 3H), 7.90 (d,  $J = 4.0$  Hz, 1H), 7.52 (d,  $J = 8.2$  Hz, 2H), 7.48 (t,  $J = 8.4$  Hz, 1H), 7.28-7.21 (m, 5H), 7.13-7.08 (m, 6H), 6.89 (d,  $J = 8.4$  Hz, 1H), 6.35 (d,  $J = 4.1$  Hz, 1H), 3.64 (s, 3H), 2.38 (s, 3H).  $^{13}\text{C}$  NMR (101 MHz,  $\text{DMSO-}d_6$ )  $\delta$  157.88, 155.78, 152.75, 151.24, 150.38 (d,  $J_{C-P} = 10.5$  Hz), 146.78, 138.69 (d,  $J_{C-P} = 3.9$  Hz), 134.71, 132.04, 130.78, 130.27, 128.50, 127.17, 125.68, 121.25, 120.44 (d,  $J_{C-P} = 7.6$  Hz), 115.59 (d,  $J_{C-P} = 18.8$  Hz), 113.01, 106.59, 105.68, 56.01, 21.62.  $^{31}\text{P}$  NMR (162 MHz,  $\text{DMSO-}d_6$ )  $\delta$  -7.07 (s, 1P). HRMS  $m/z$  (ESI) calcd for  $\text{C}_{32}\text{H}_{27}\text{N}_4\text{O}_6\text{PS}$   $[\text{M}+\text{H}]^+$ : 627.1462, found: 627.1472.

**$^1\text{H}$ ,  $^{13}\text{C}$ ,  $^{31}\text{P}$  NMR Spectra for the compounds**

ZCX-MXW-BFFX

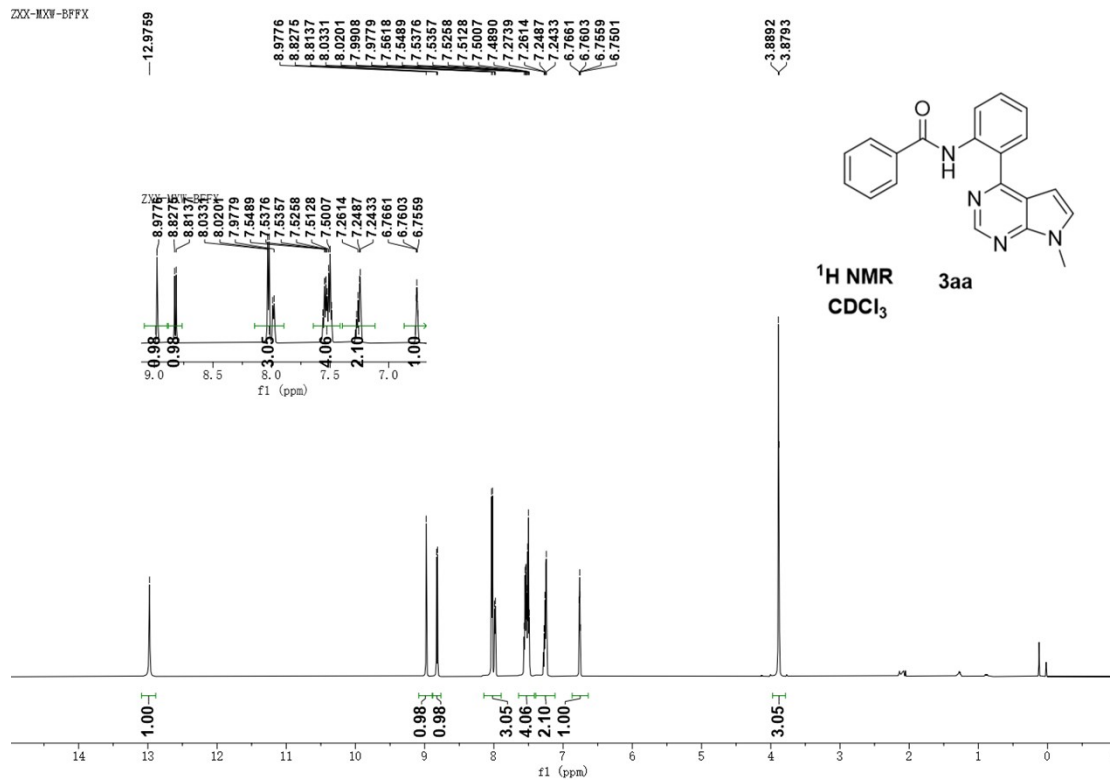

ZCX-MXW-BFFX

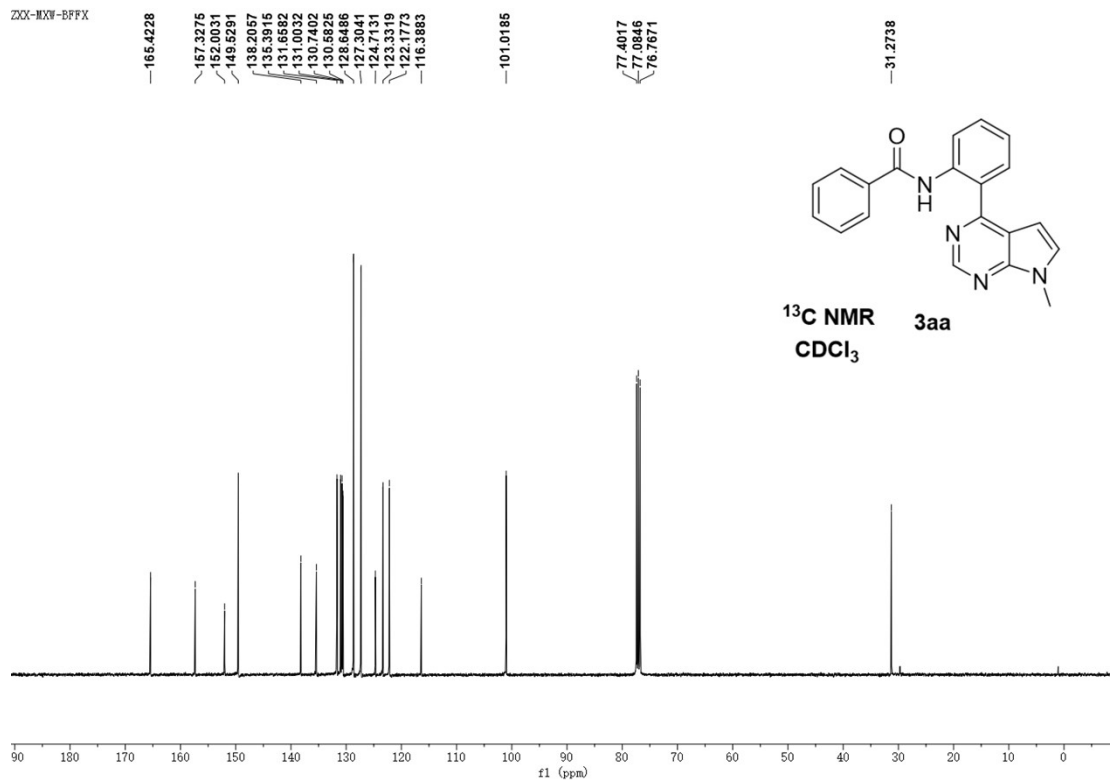

PCH230228BJ1.1.fid

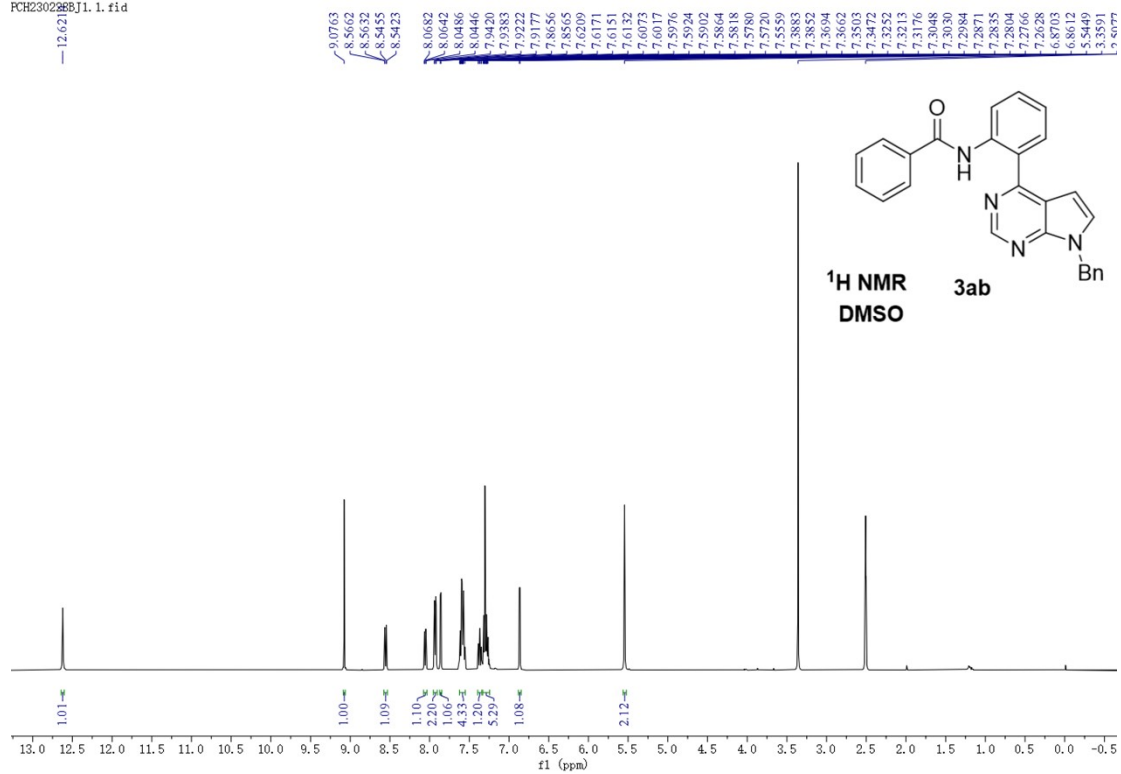

PCH230228BJ1.1.fid

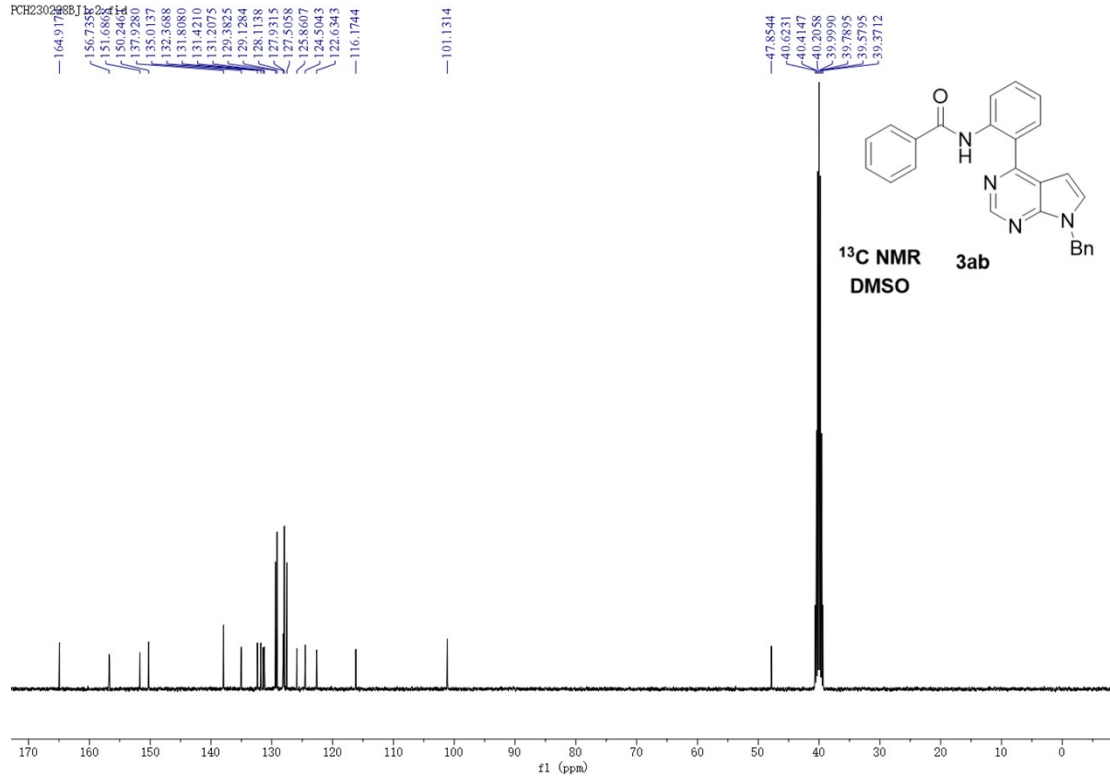

PHK-200613

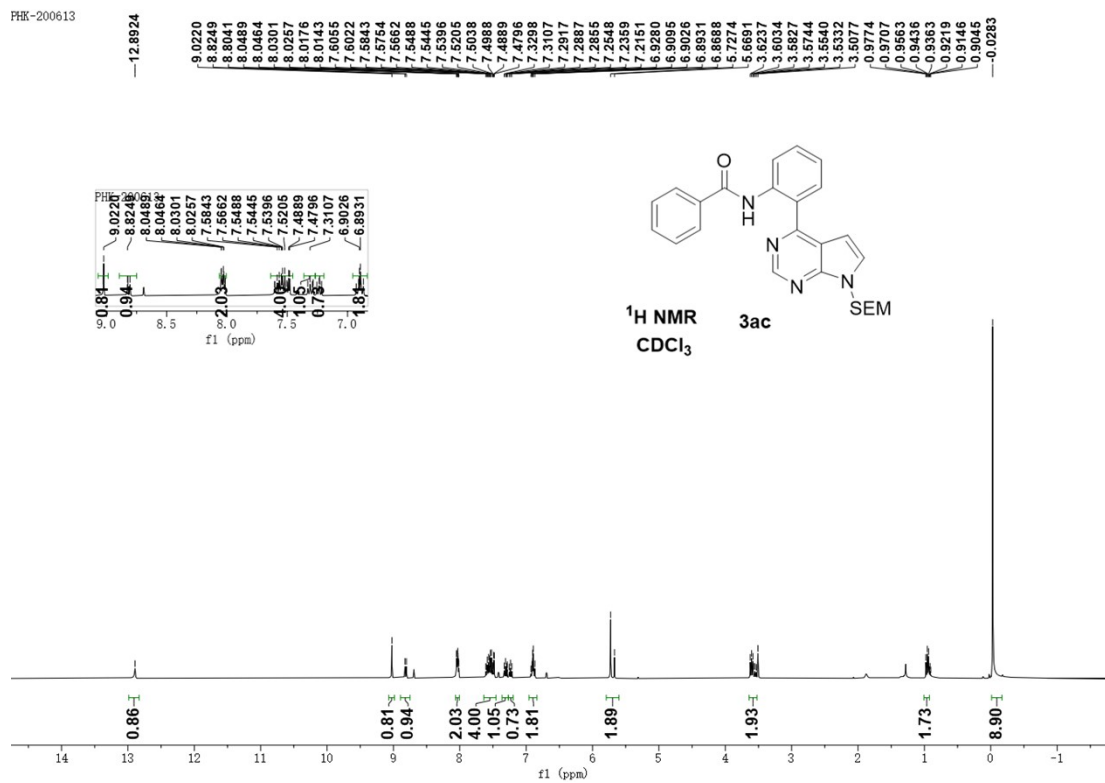

PHK-200613

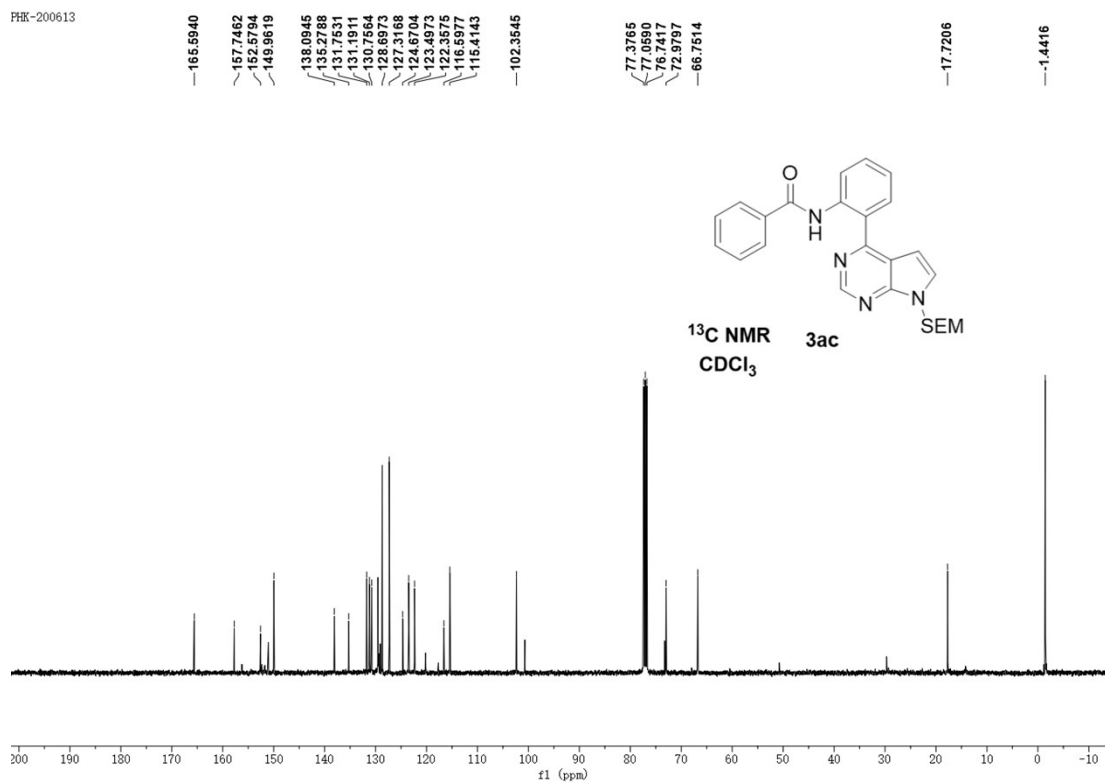

PCH230306TJ1.1.fid

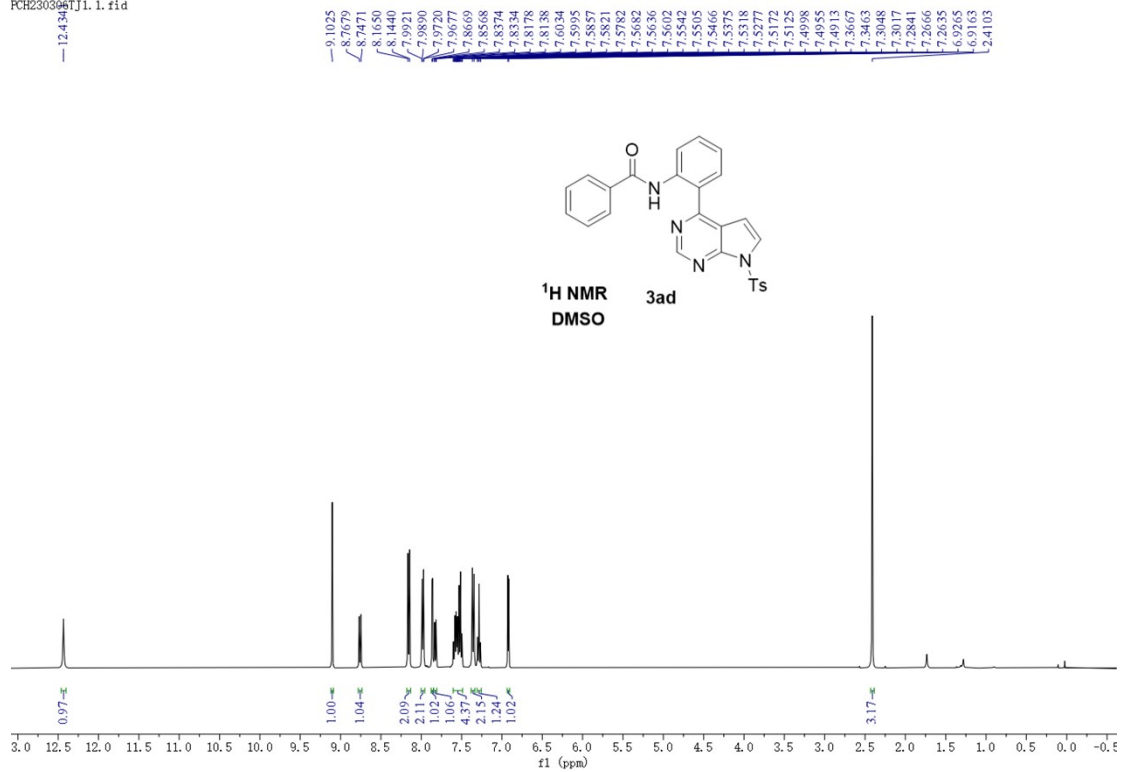

PCH230306TJ1.1.fid

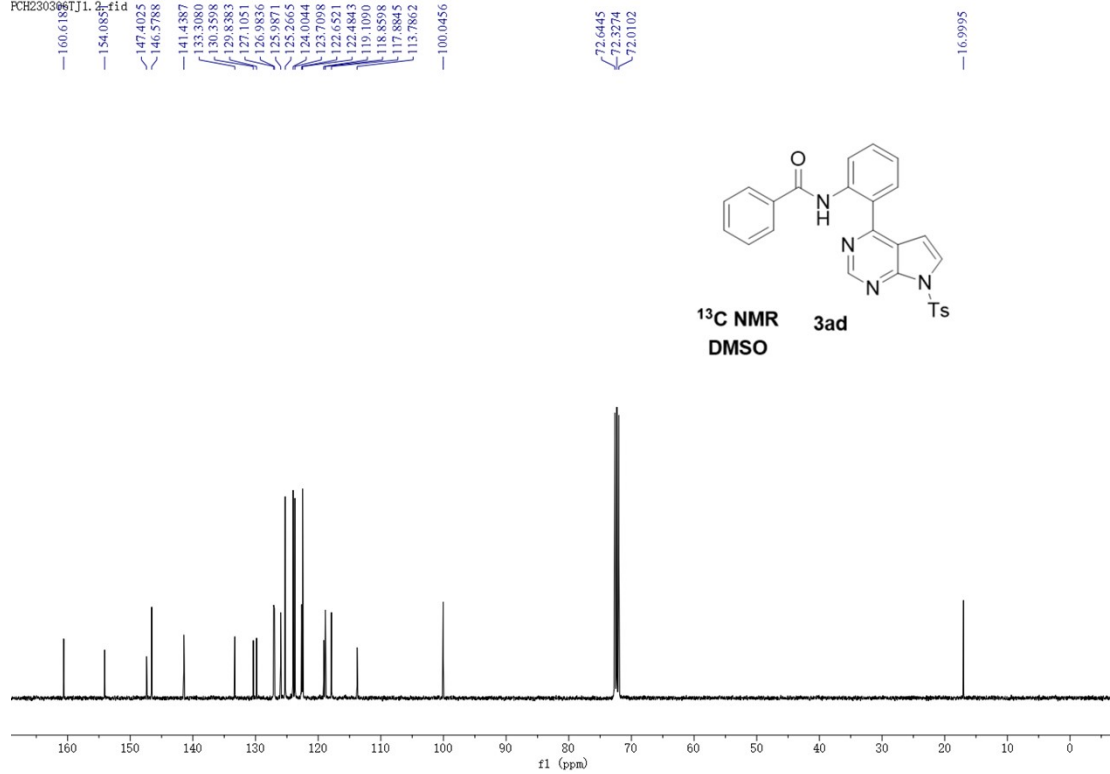

PCH23032578. 1. f1.d

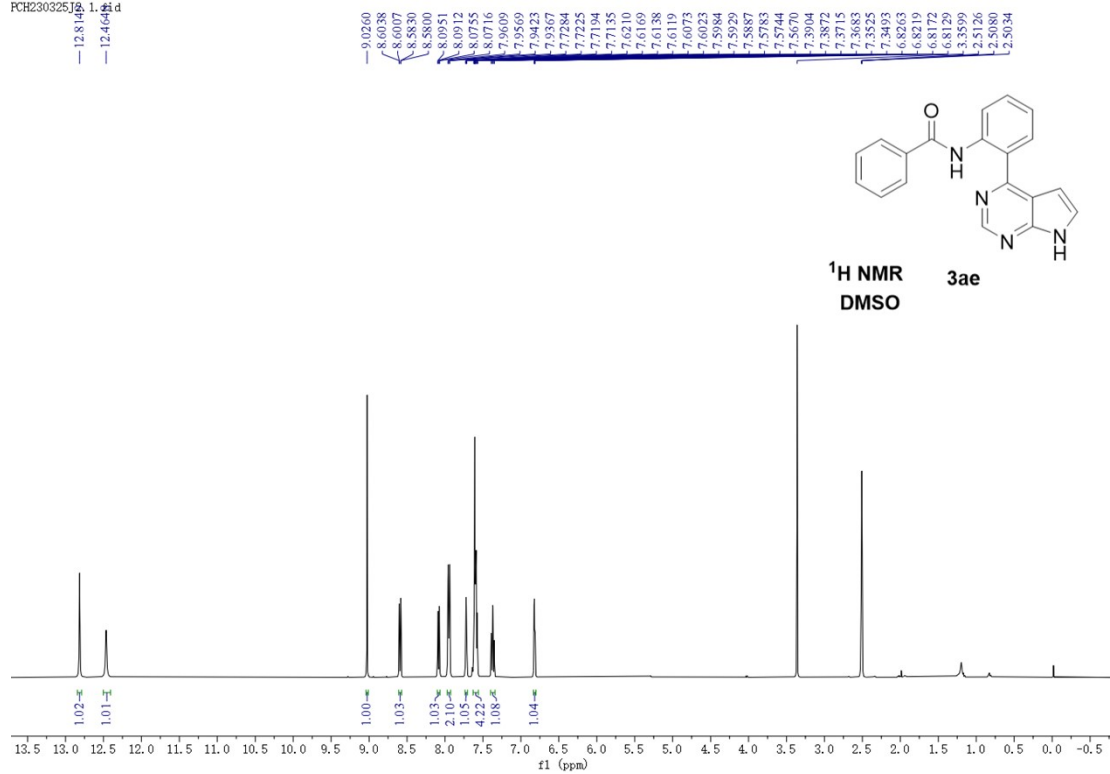

PCH23061919. 2. f1.d

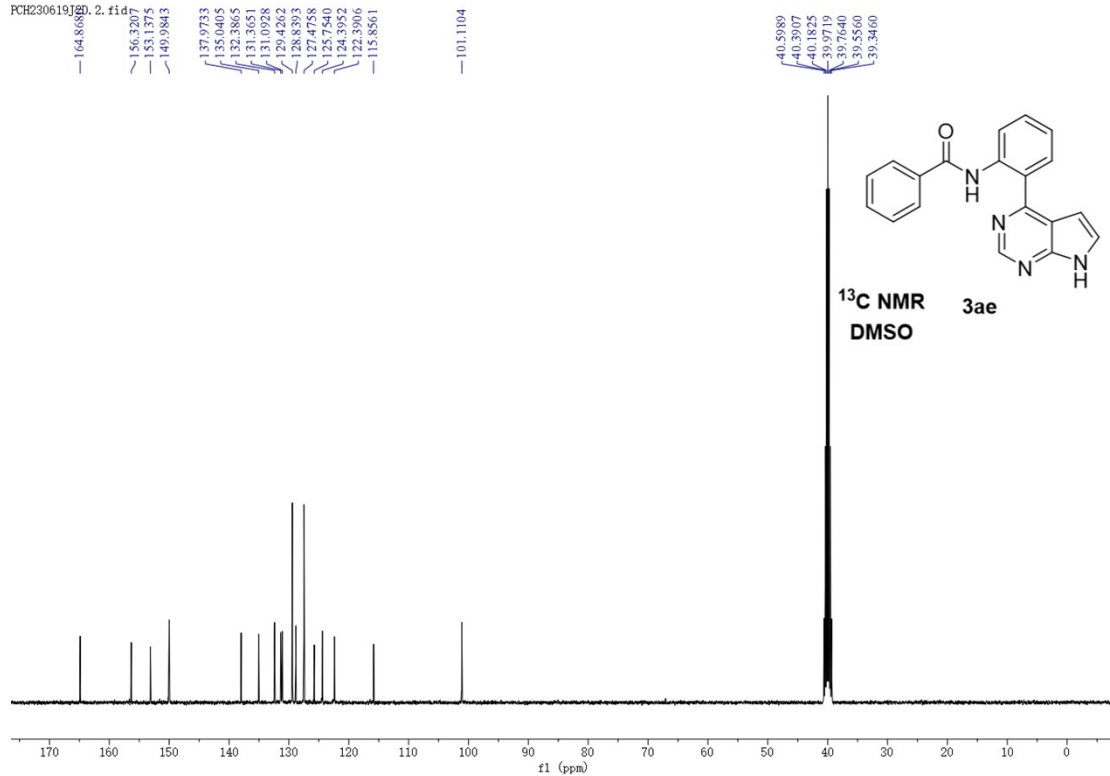

PCH-23041415.1.fid

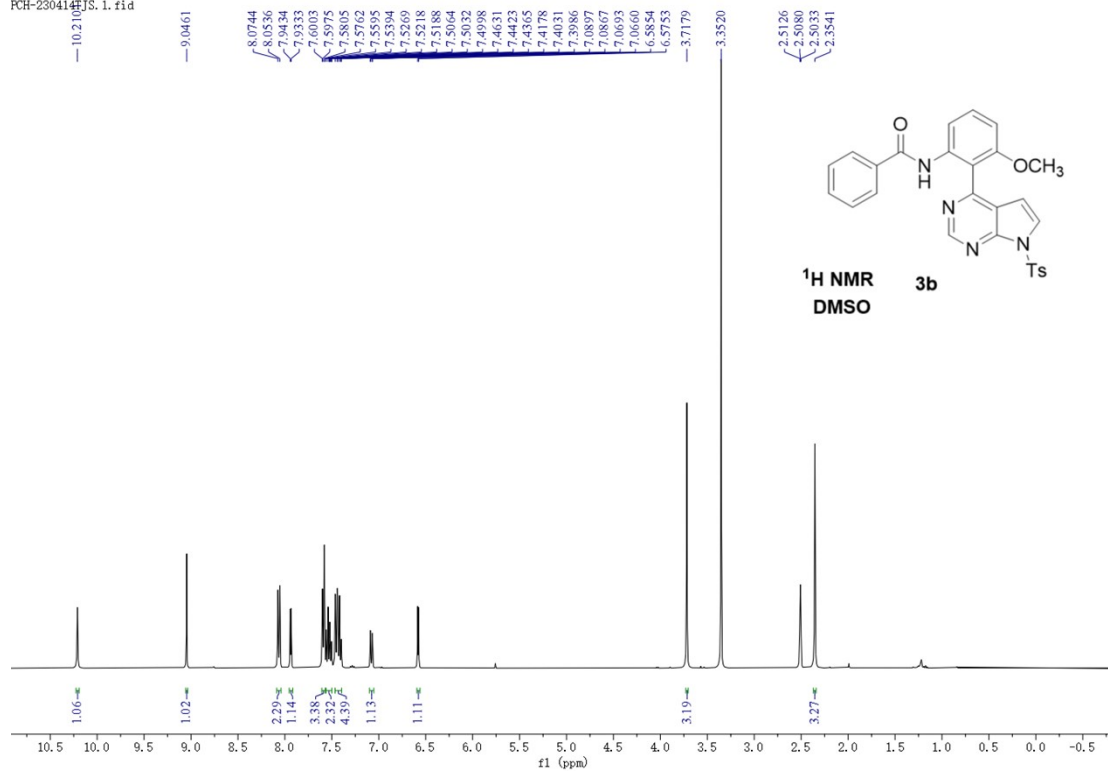

PCH23041415

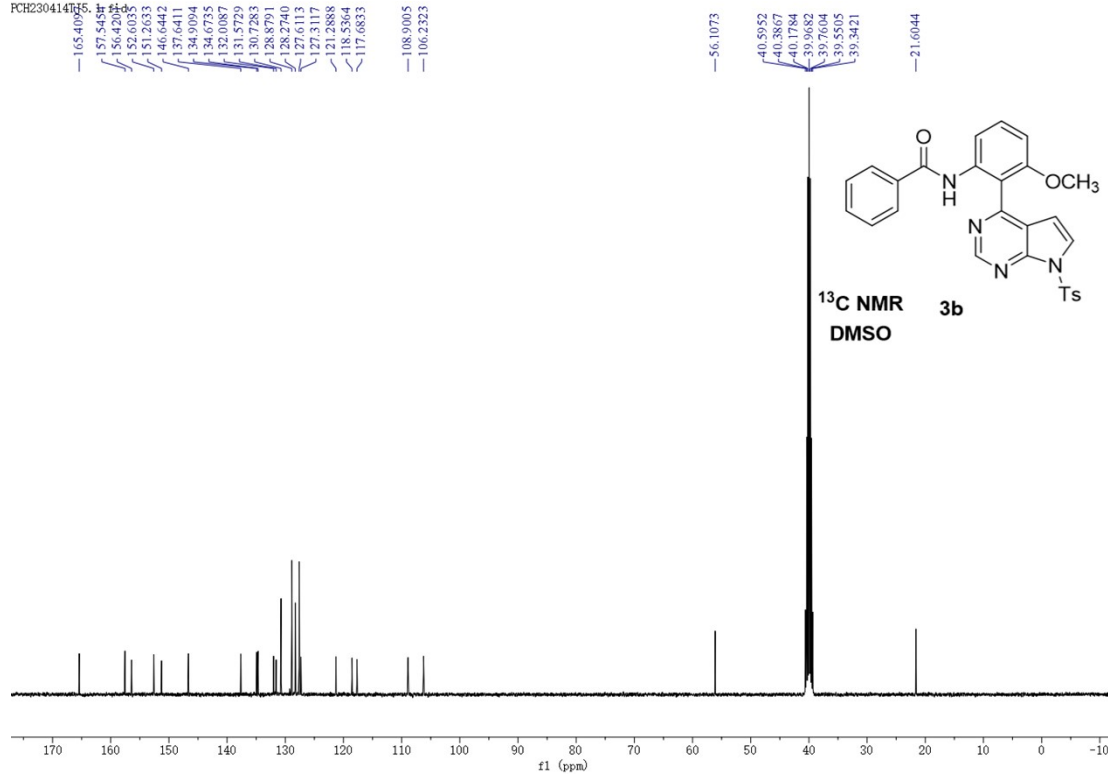

PHK-200603A

13.3076

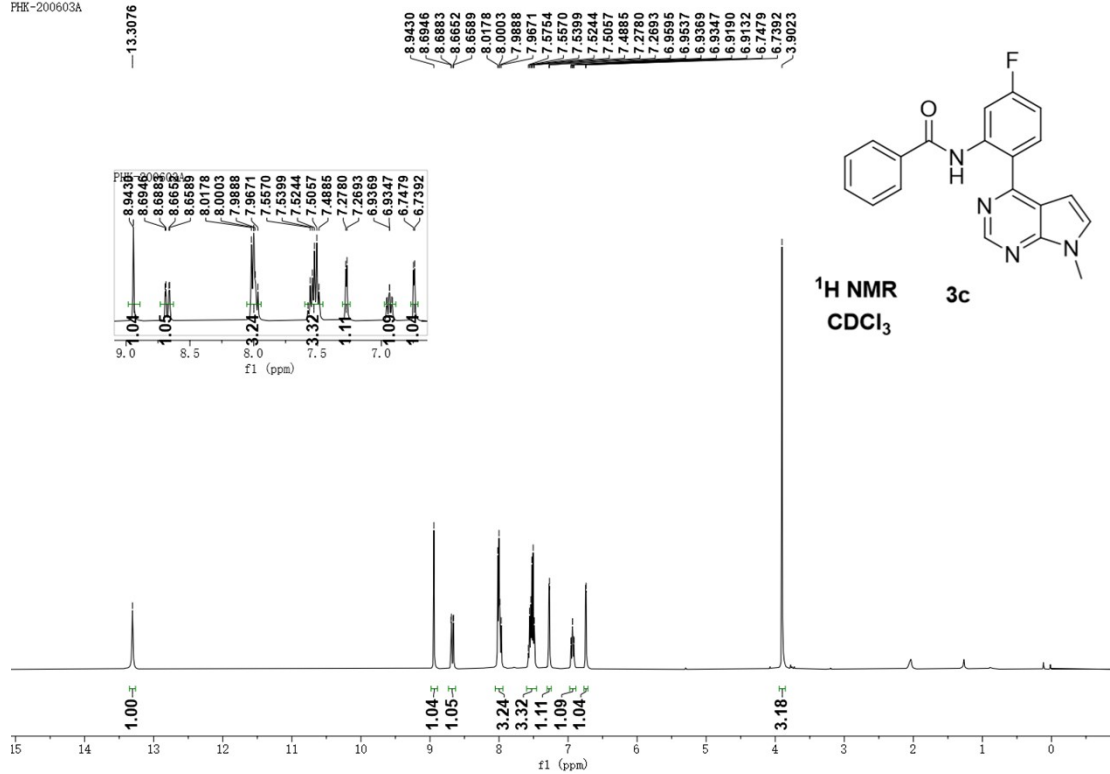

PHK-200603A

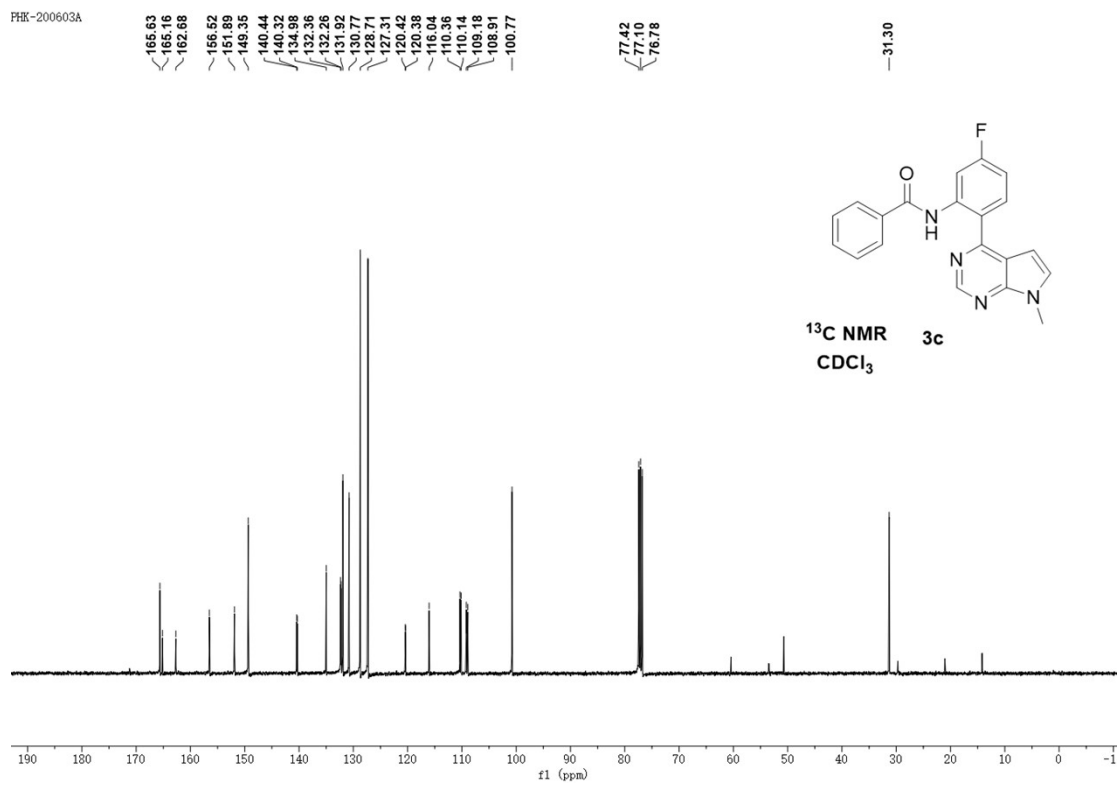



PHK-200517

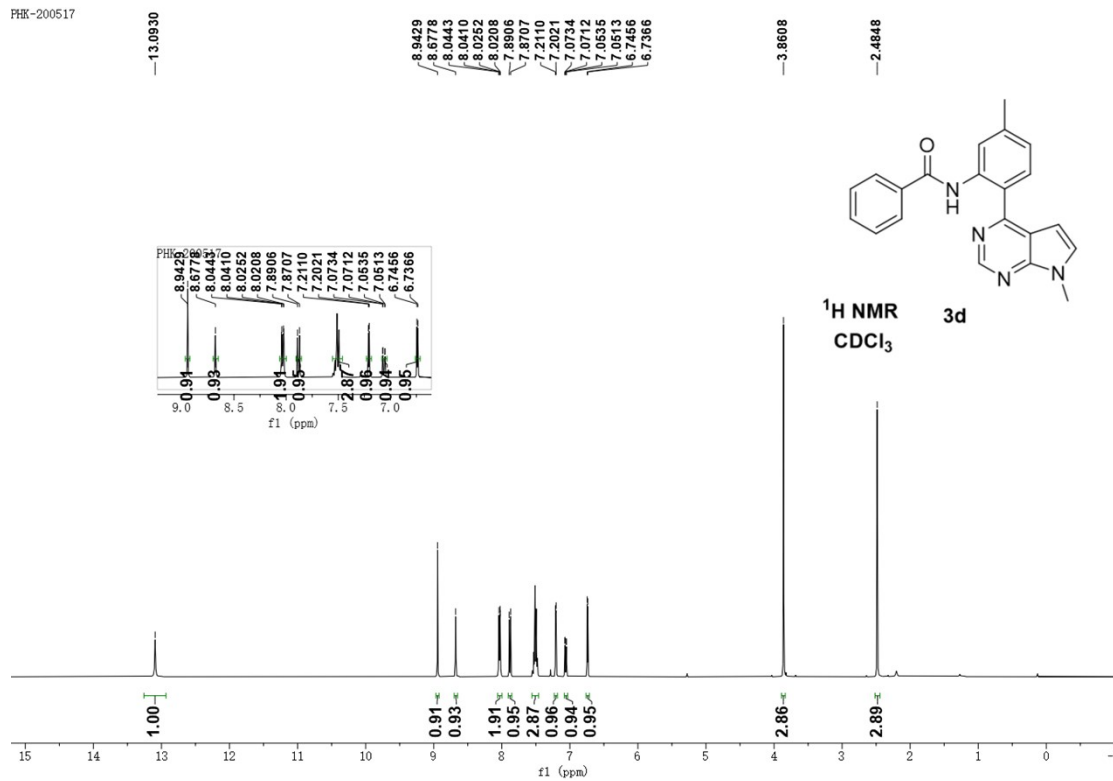

PHK-200517

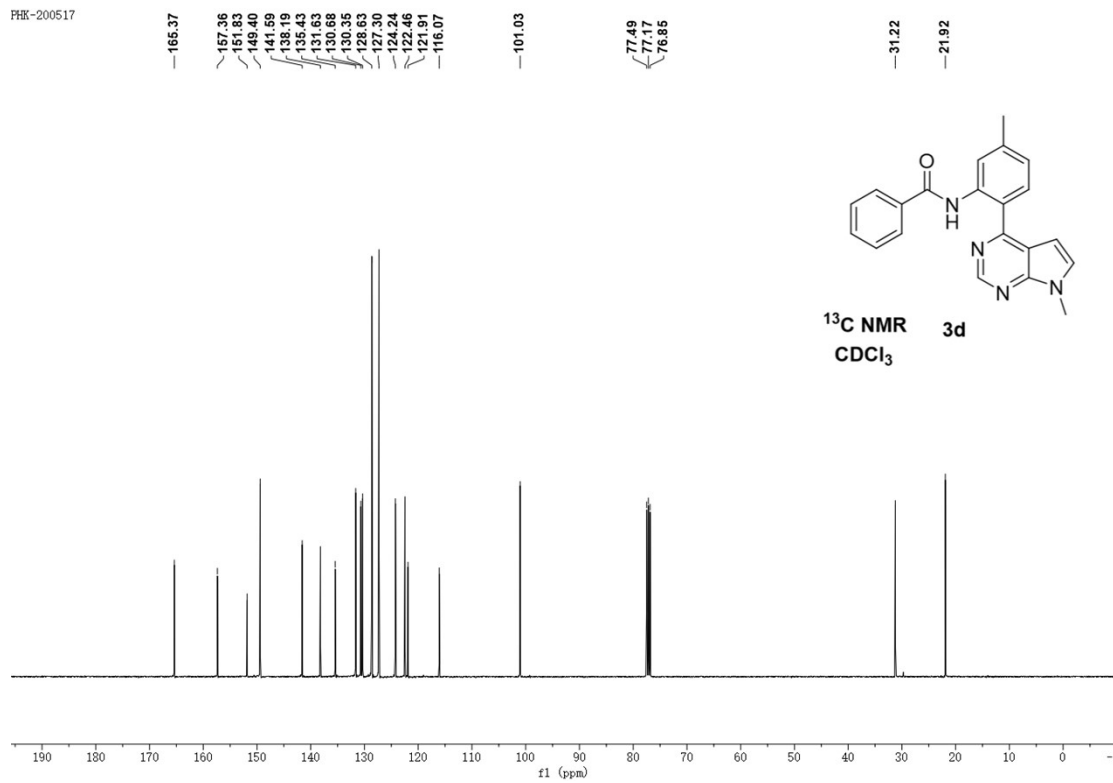

PHK-200512

13.0574

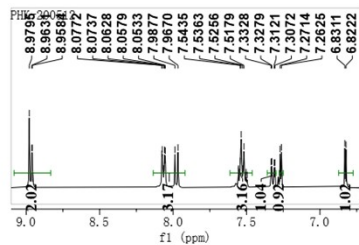

8.3795  
8.3651  
8.3524  
8.0772  
8.0628  
8.0579  
8.0533  
7.9877  
7.9670  
7.5663  
7.5545  
7.5478  
7.5435  
7.5363  
7.5266  
7.5179  
7.5070  
7.5028  
7.4961  
7.3328  
7.3279  
7.3121  
7.3072  
7.2714  
7.2625  
6.8311  
6.8222  
3.9175

1.4642

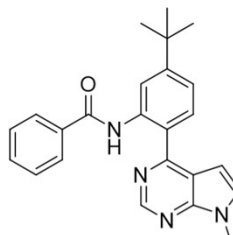

<sup>1</sup>H NMR  
CDCl<sub>3</sub>

3e

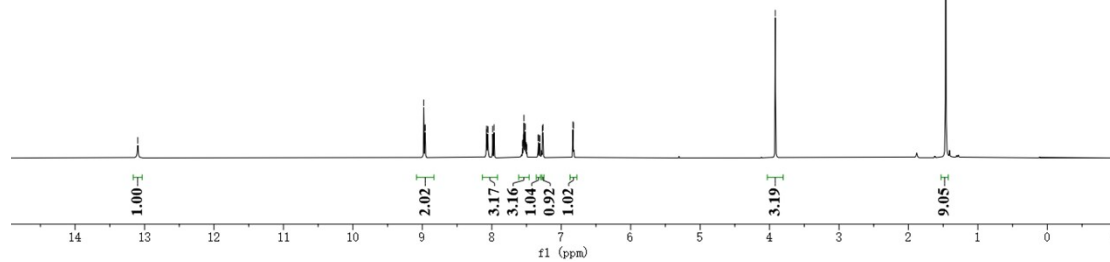

PHK-200512

165.62

167.41  
164.74  
161.93  
149.54

138.20  
135.65  
131.81  
130.49  
130.30  
128.65  
127.31  
121.99  
120.51  
119.35  
116.17

101.15

77.39  
77.07  
76.75

35.25  
31.26  
31.22

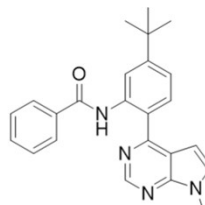

<sup>13</sup>C NMR  
CDCl<sub>3</sub>

3e

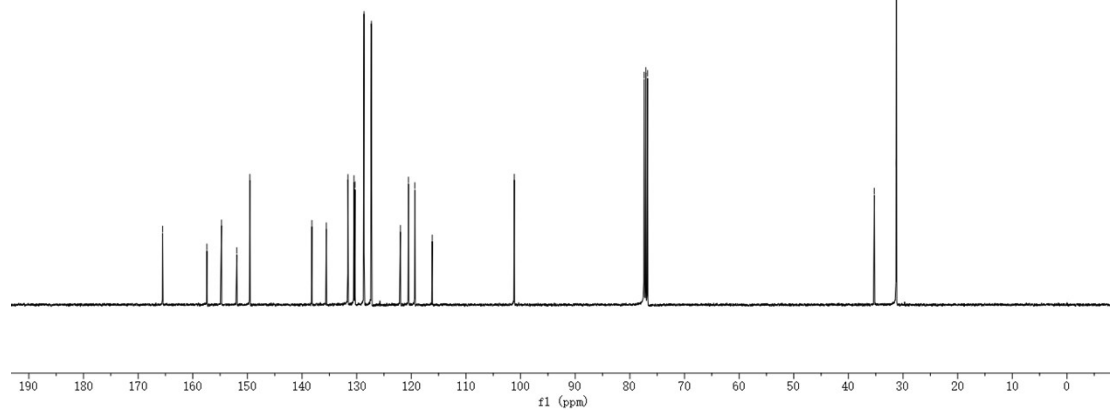

PCH230529T15-4.fid

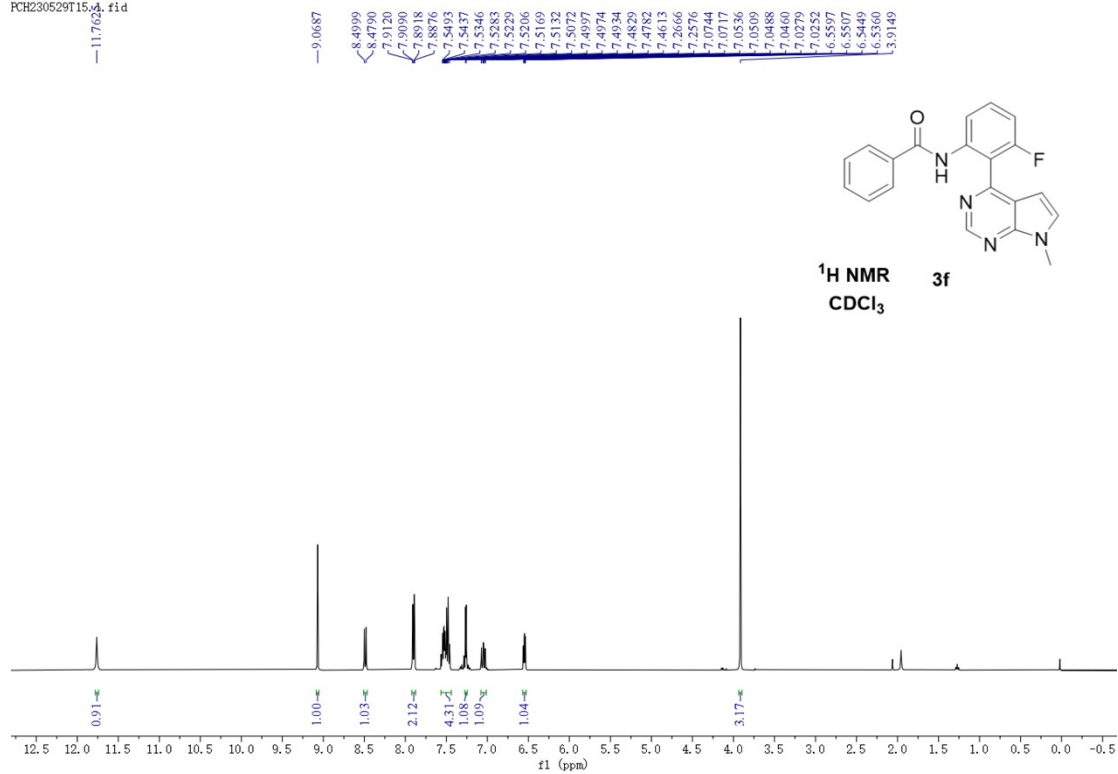

PCH230529T15-4.fid

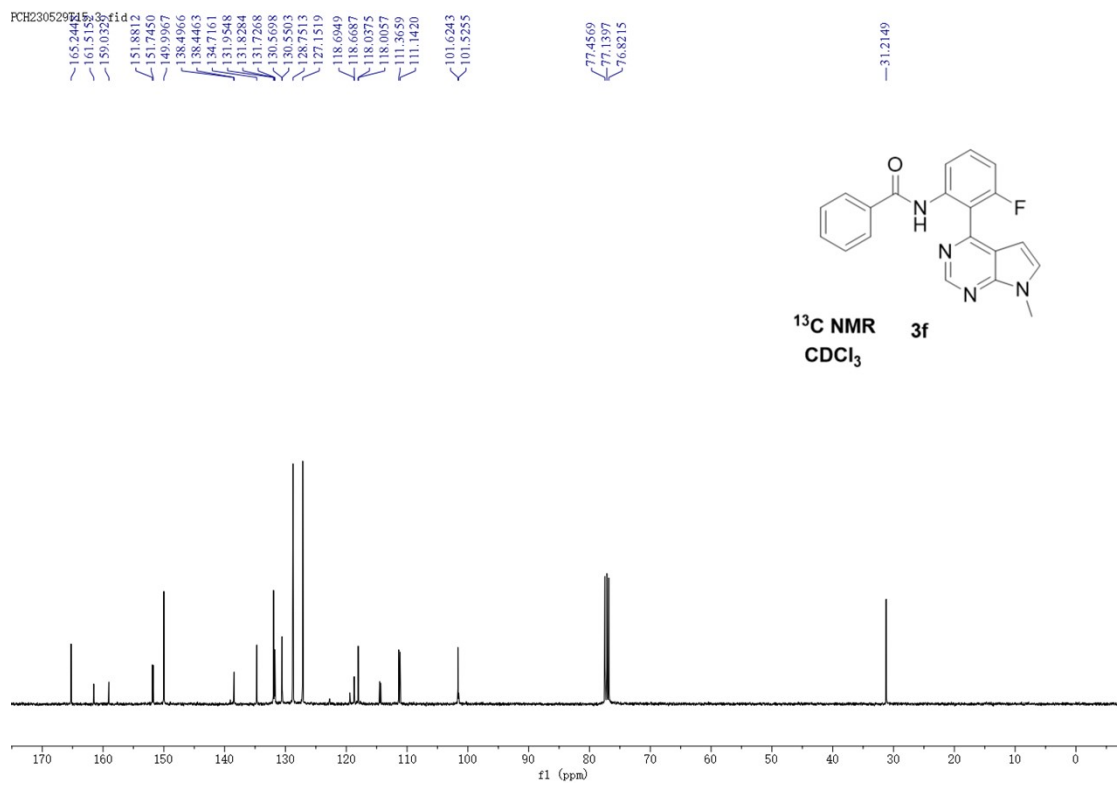

PHK-200511

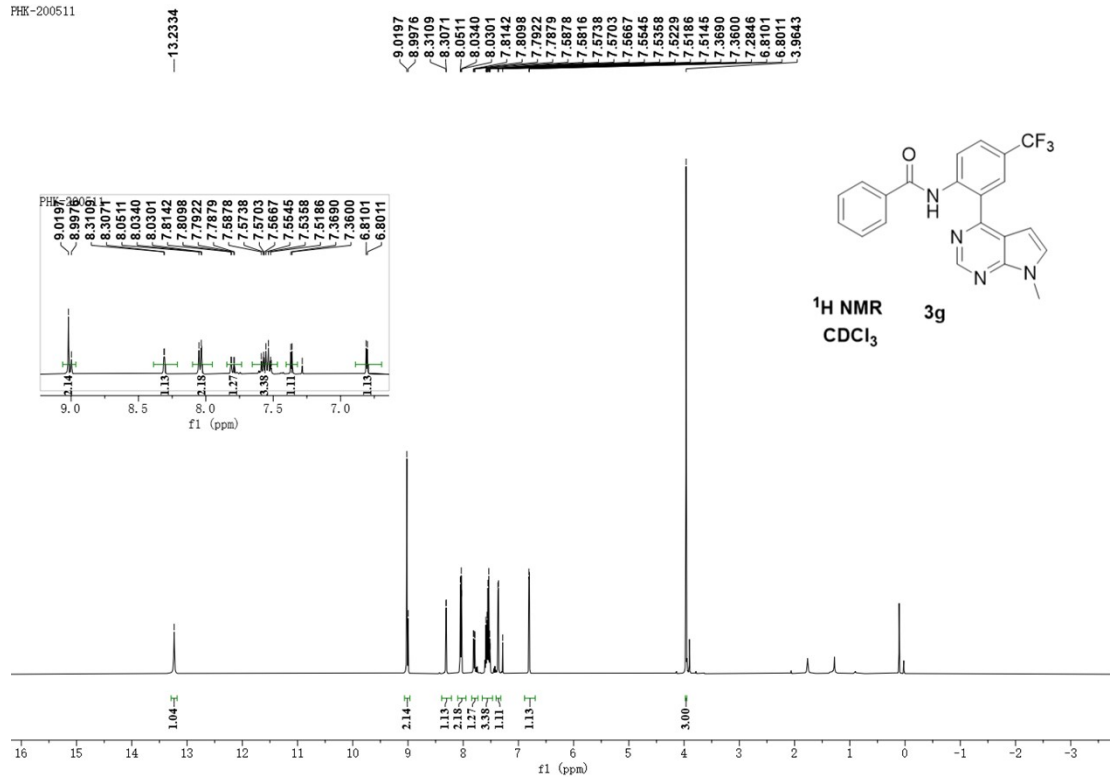

PHK-200511

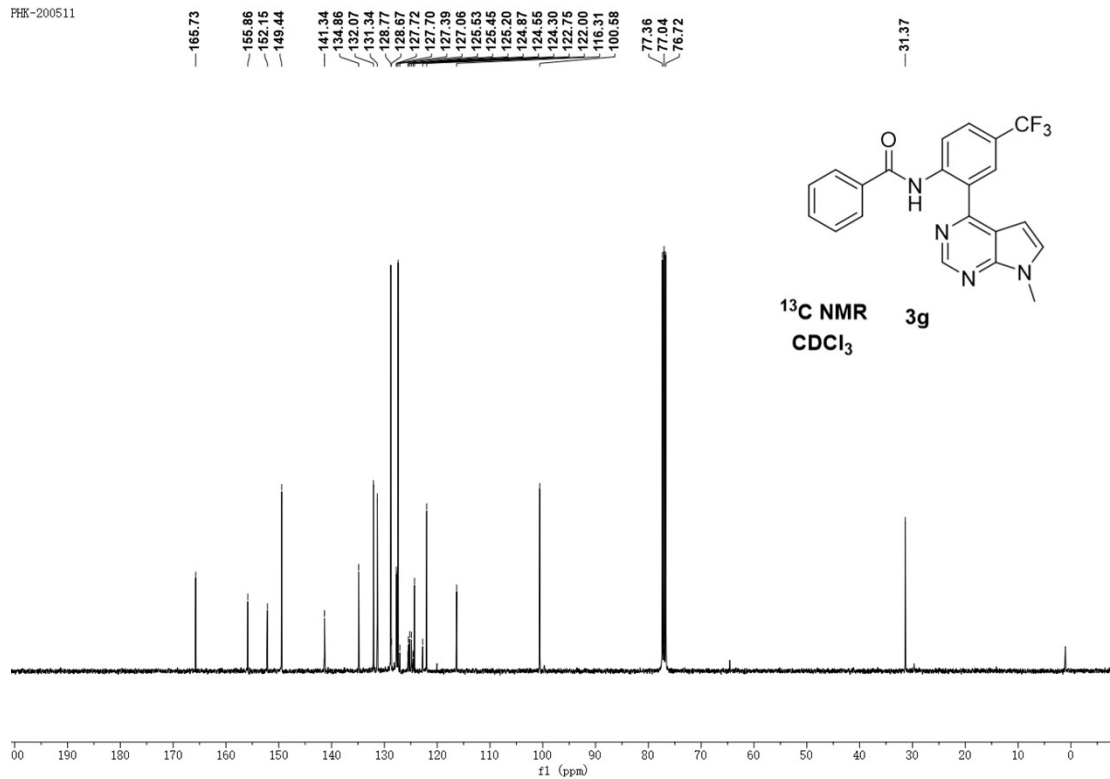

PHK-200511A

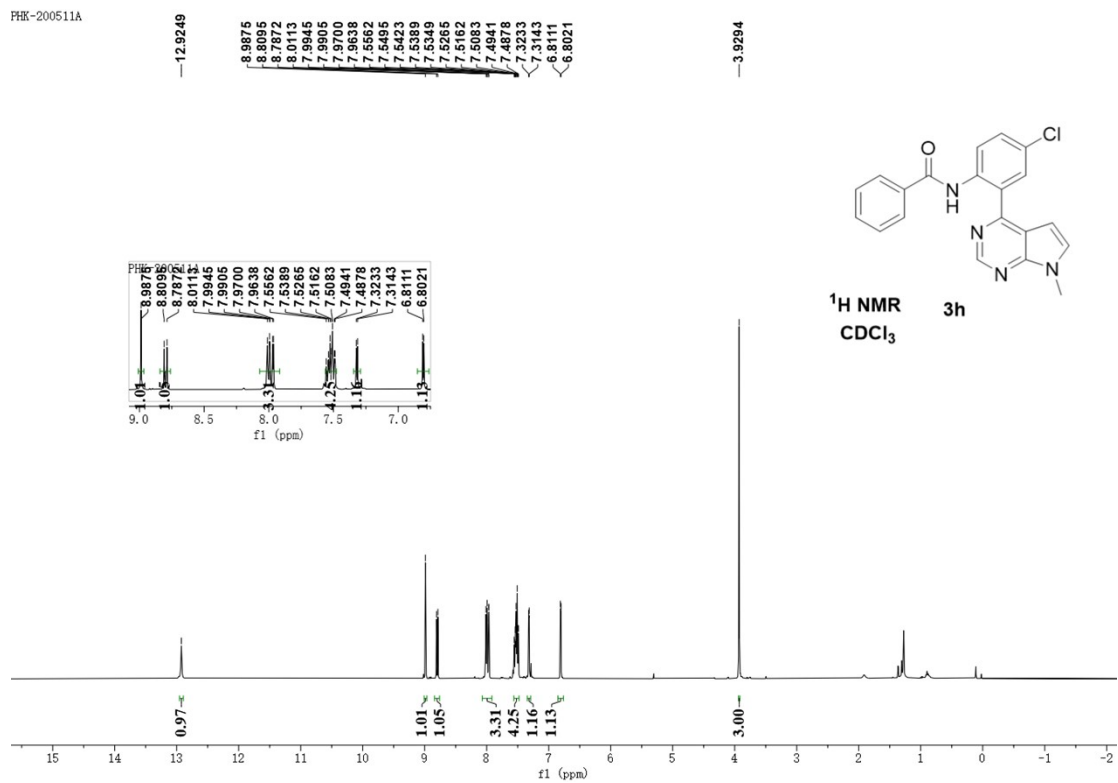

PHK-200511A

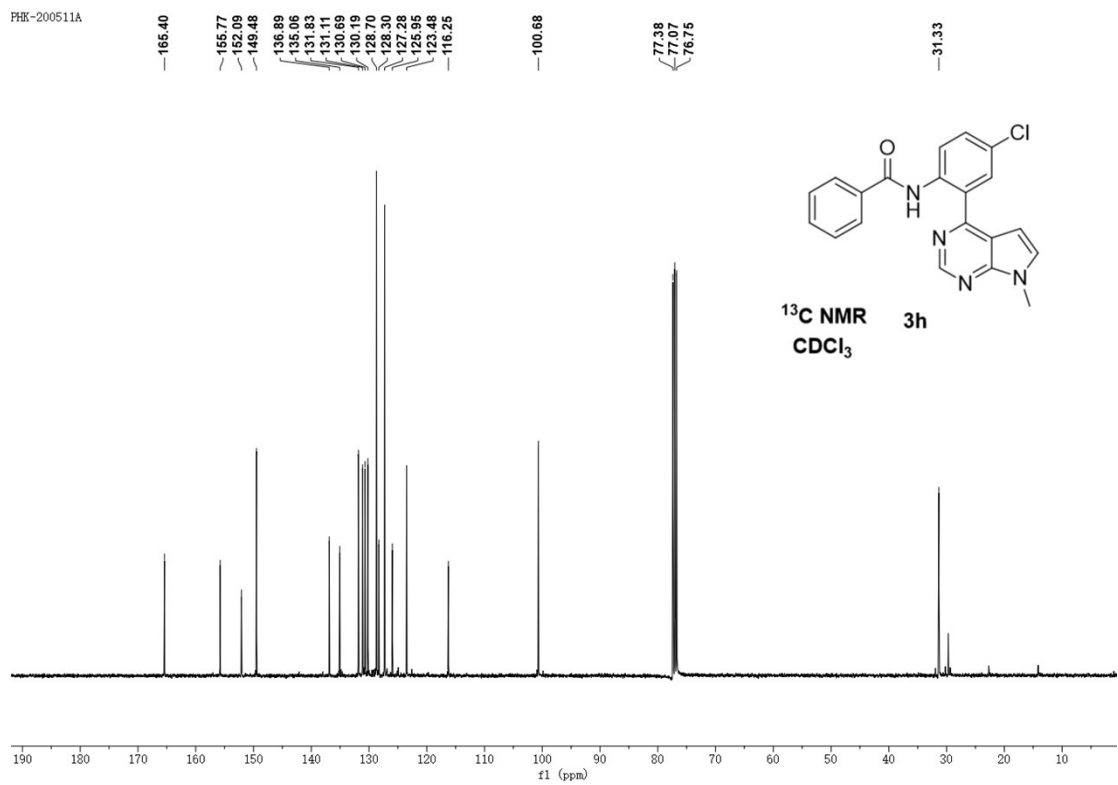



PCH230609T7.1.fid

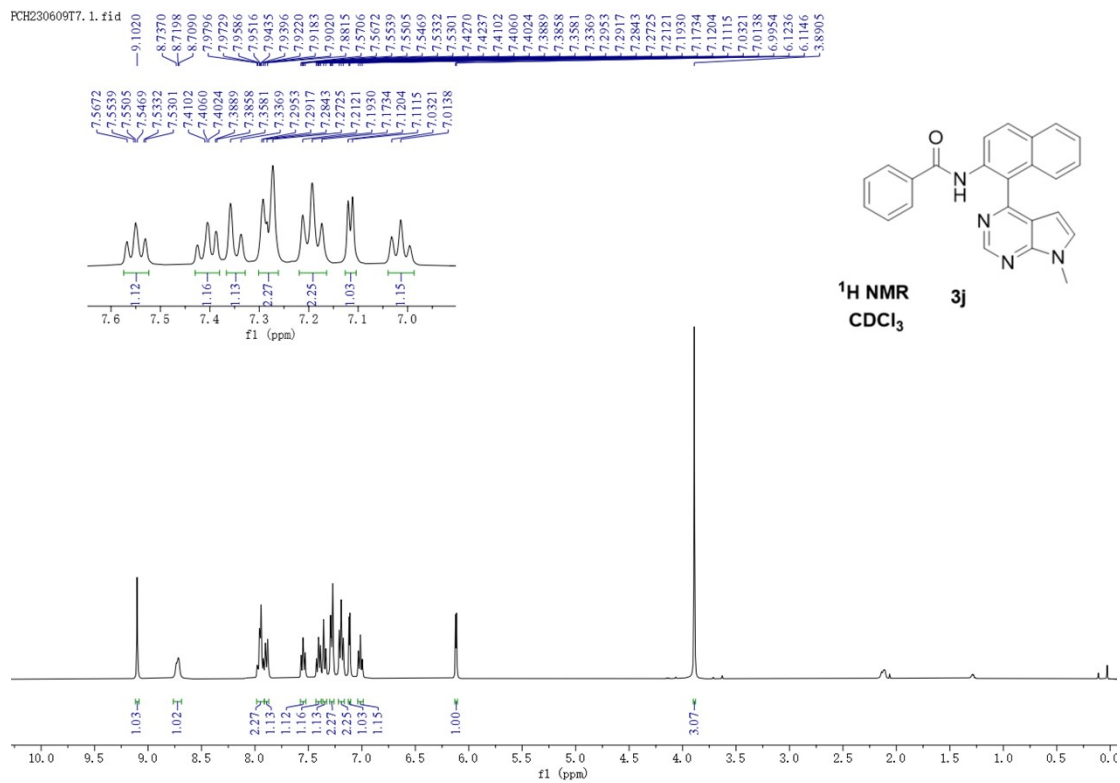

PCH230609T7.2.fid

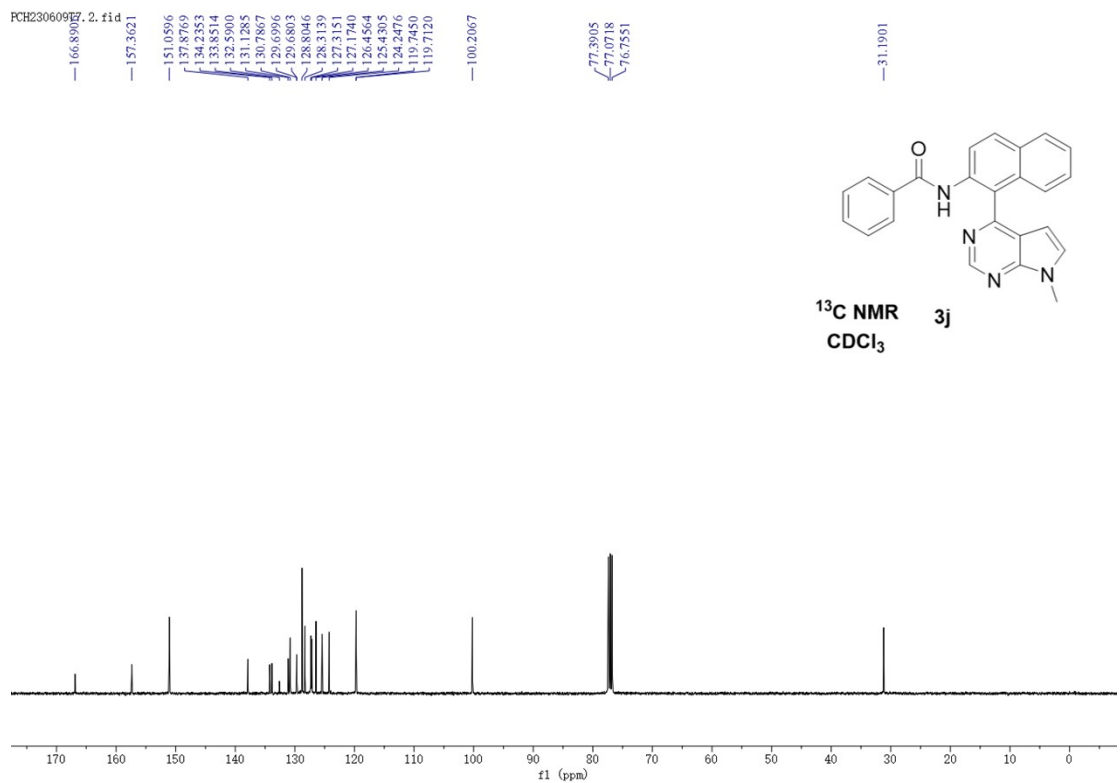

PCH230919T28.1.fid

12.8386

9.0260  
8.8491  
8.8441  
8.8293  
8.8282  
8.0501  
8.0431  
8.0377  
8.0262  
8.0211  
8.0116  
8.0073  
7.9917  
7.9877  
7.6798  
7.6708  
7.5513  
7.5470  
7.5307  
7.5366  
7.3334  
7.3176  
7.3143  
7.2984  
7.2953  
6.7615  
6.7524  
3.8346  
3.4034  
2.5178  
2.5132  
2.5085  
2.5037  
2.4991

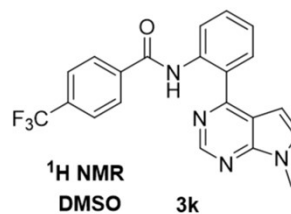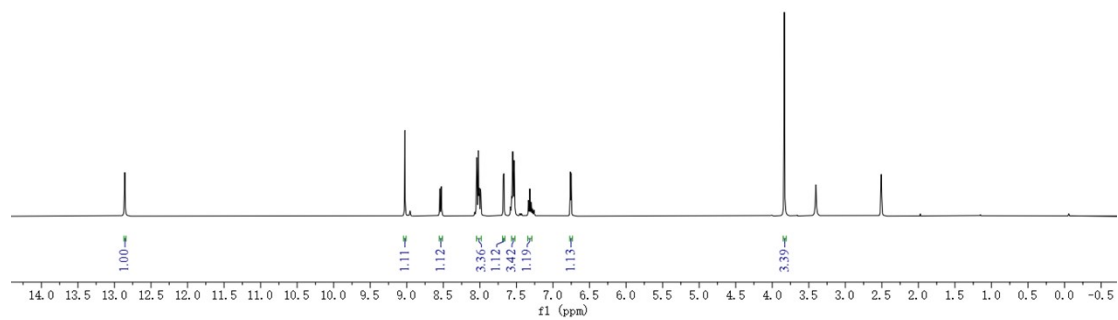

PCH0918T28.1.fid

163.5092

156.2227  
151.8274  
151.1222  
151.1046  
149.8692  
137.8374  
137.5906  
132.5996  
131.2855  
131.0777  
129.8204  
125.6203  
124.4661  
122.3871  
121.4320  
115.9276

100.3512

40.5843  
40.3765  
40.1662  
39.9586  
39.7500  
39.5410  
39.3315  
31.3007

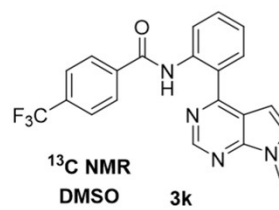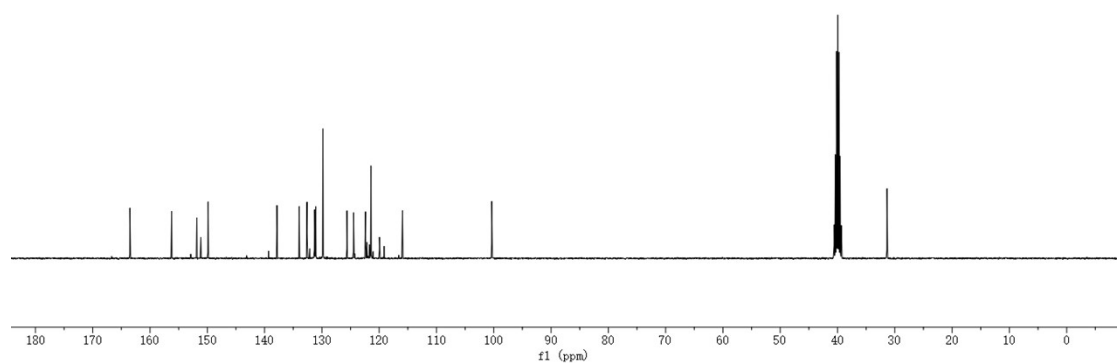



PCH230904T25. 1. d

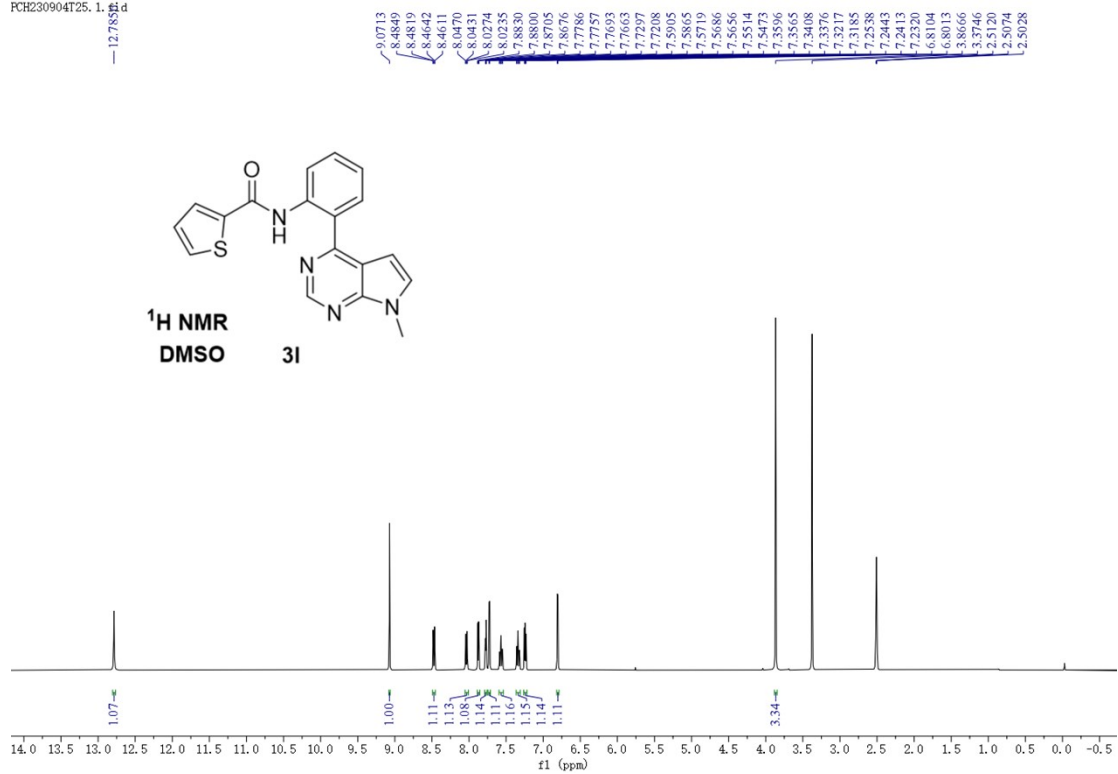

Desktop/PCH230904T25  
PCH230925T25

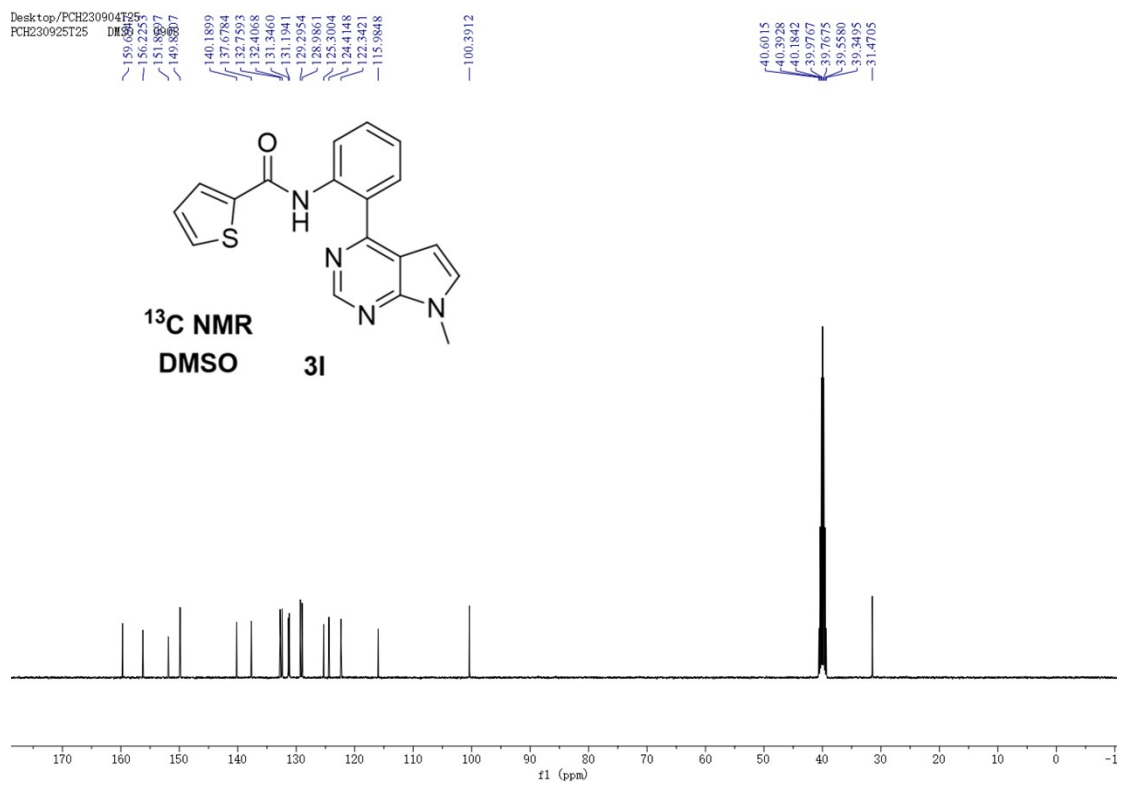

Desktop. 121902304.fid  
PCH12193M CDCl<sub>3</sub> 1222

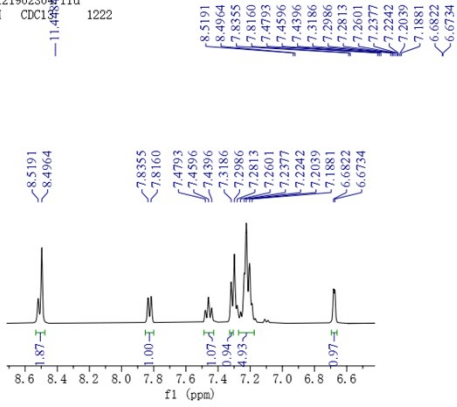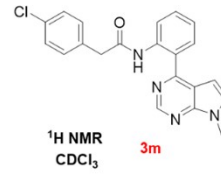

3.9052  
3.6901

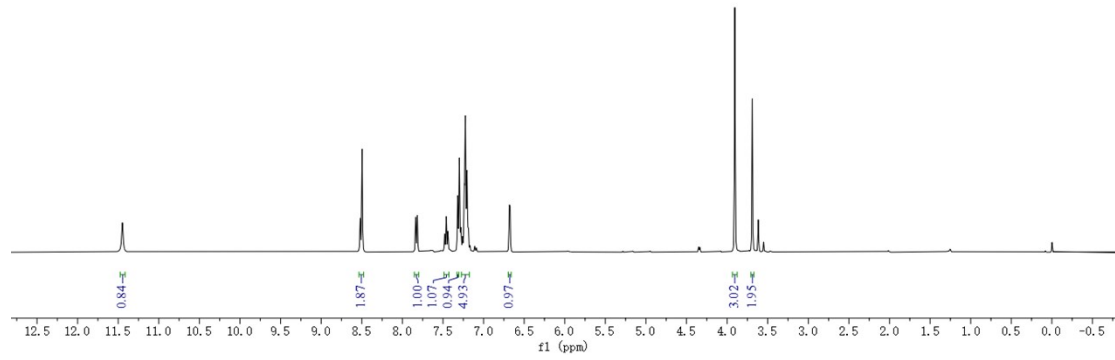

Desktop. 121902303.fid  
PCH12193M CDCl<sub>3</sub> 1223

169.887  
156.087  
151.7711  
149.5946  
137.2036  
133.3560  
132.9331  
131.1092  
129.1622  
130.4097  
130.4950  
129.0261  
125.1374  
123.6760  
122.5144  
116.2709  
100.8142  
77.4013  
77.0836  
76.7659  
44.7246  
31.3587

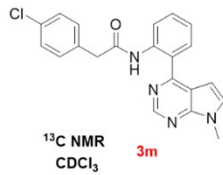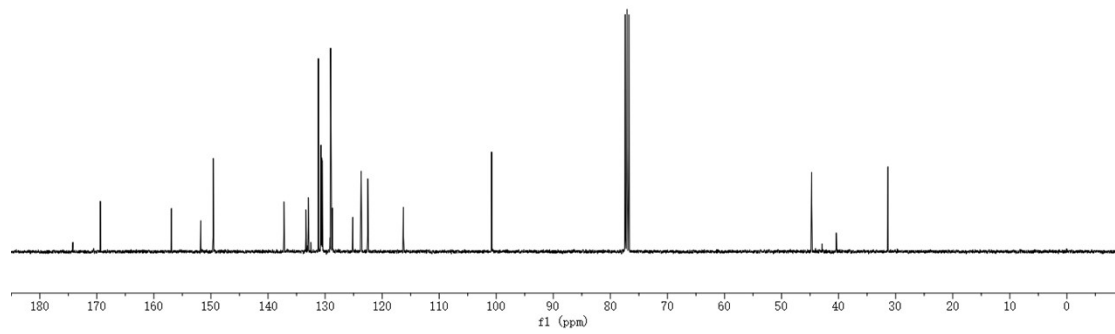

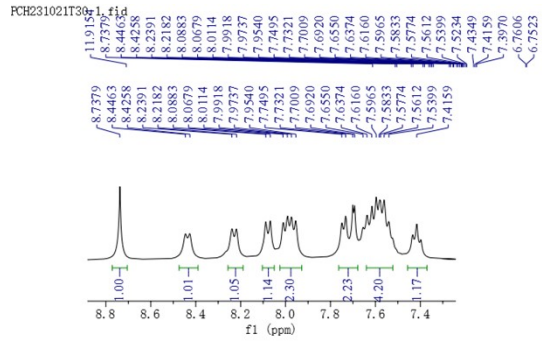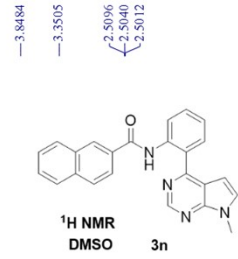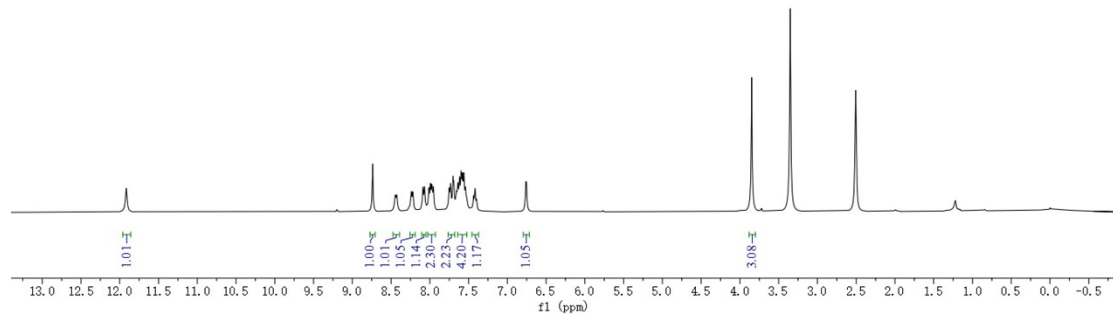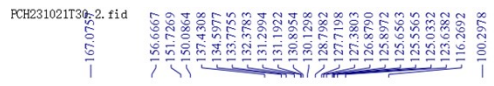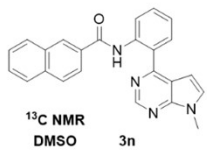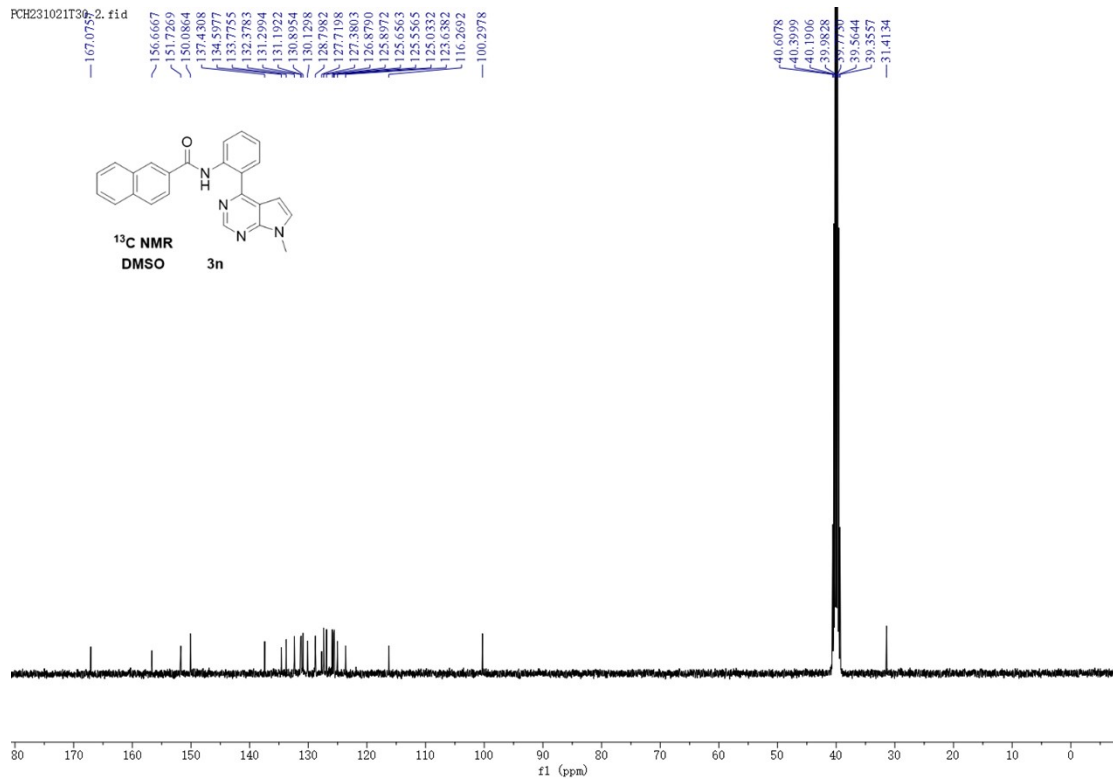

Desktop. 121902302.fid  
PCH121930 DMSO 1222

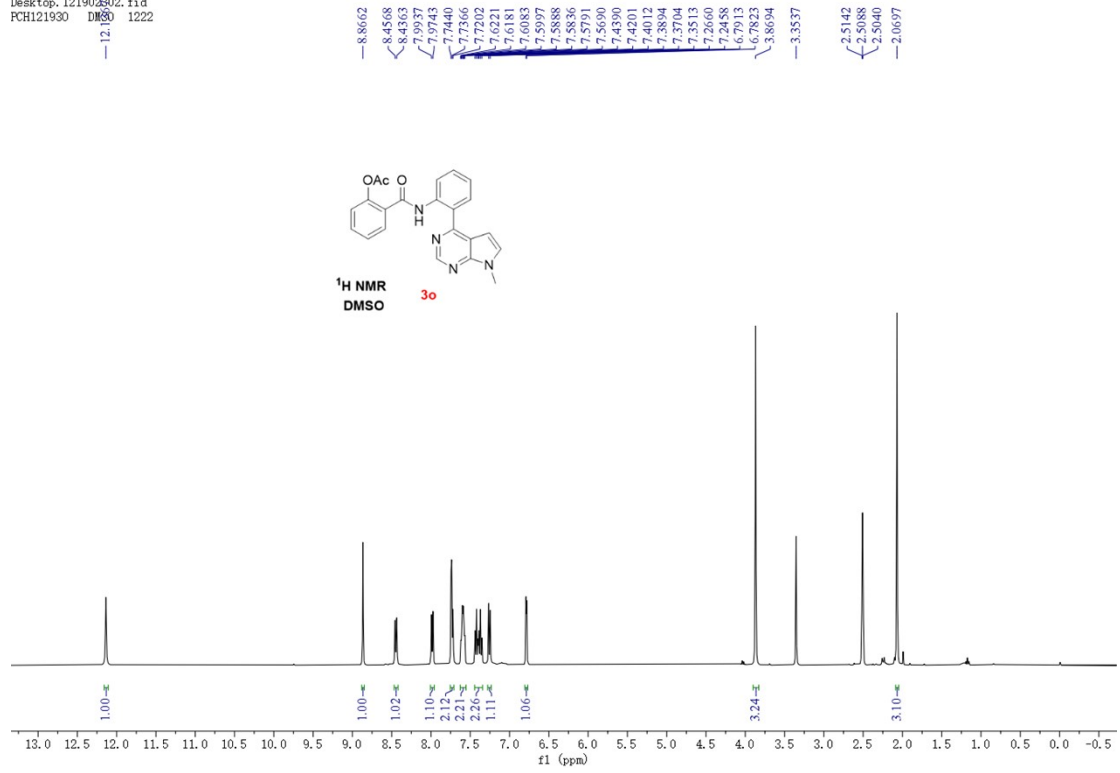

Desktop. 124902304.fid  
PCH121930 DMSO 1222

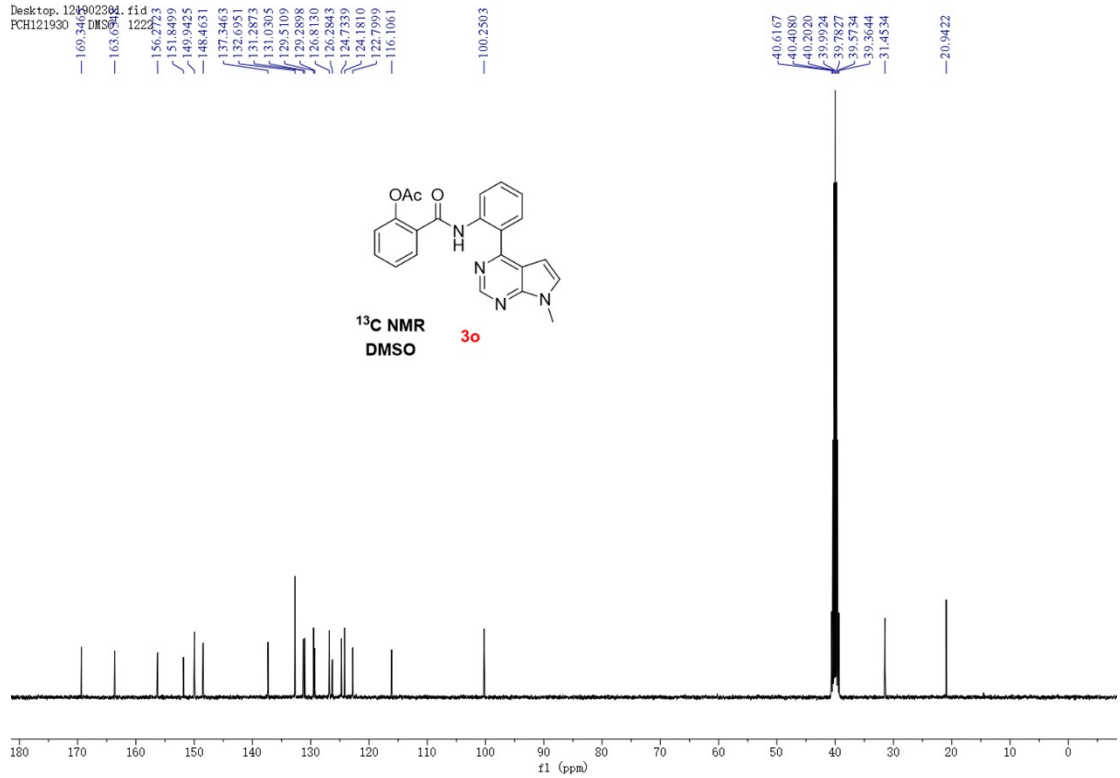

PCH2300245F1 11. fid

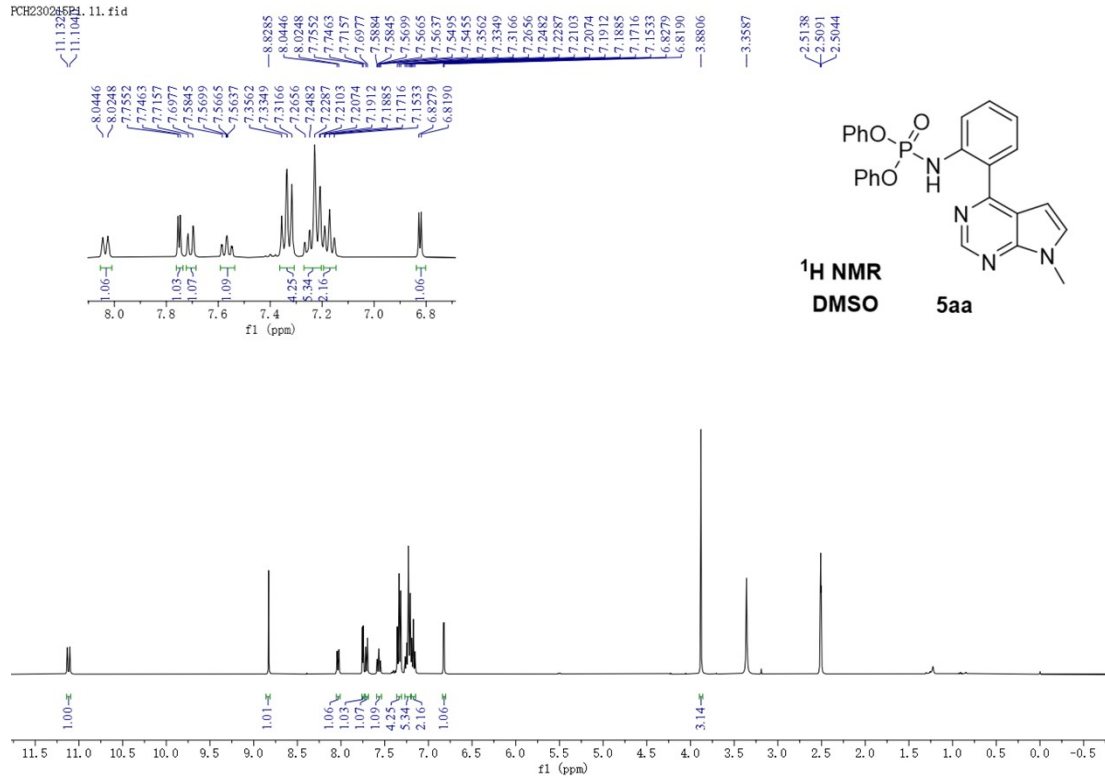

PCH2300245F1

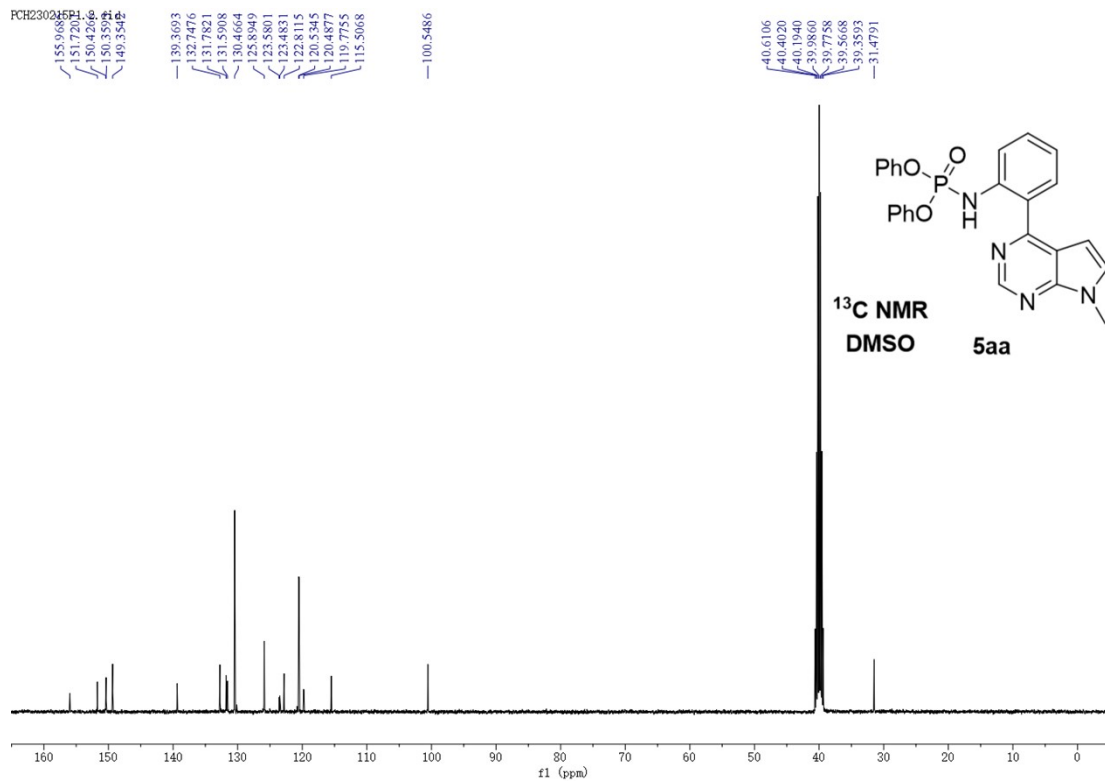

PCH230215P1.3.fid

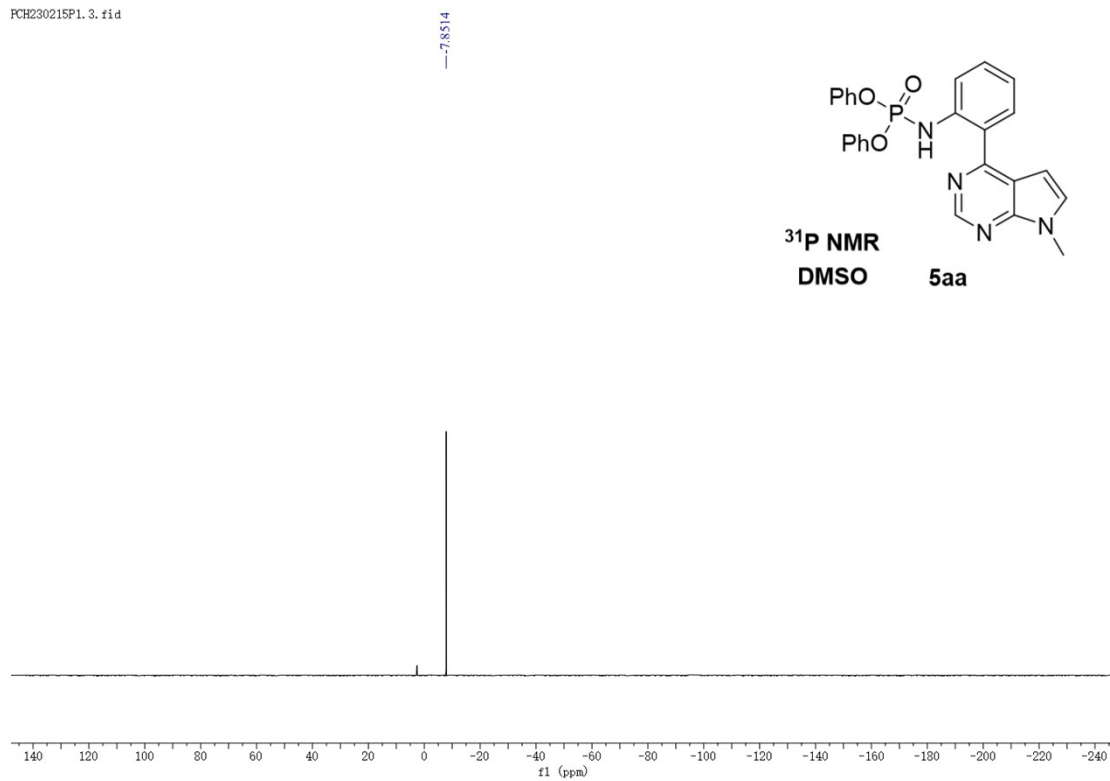

PCH23022389.fid

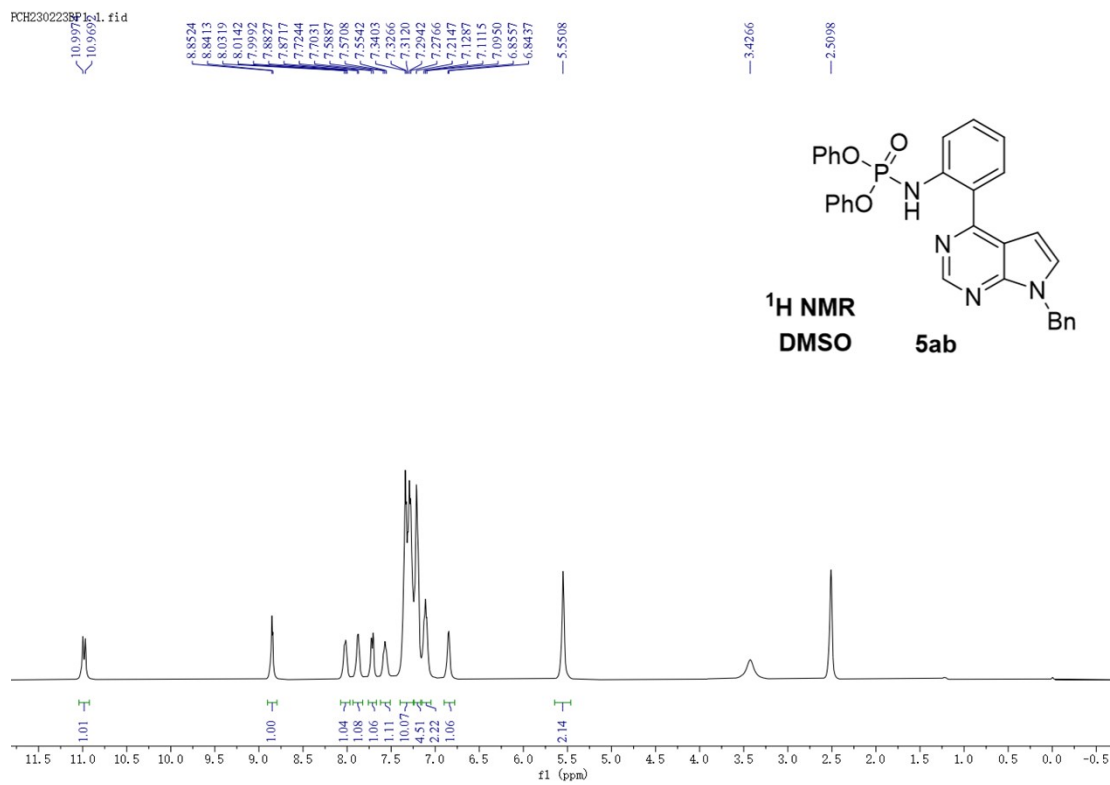

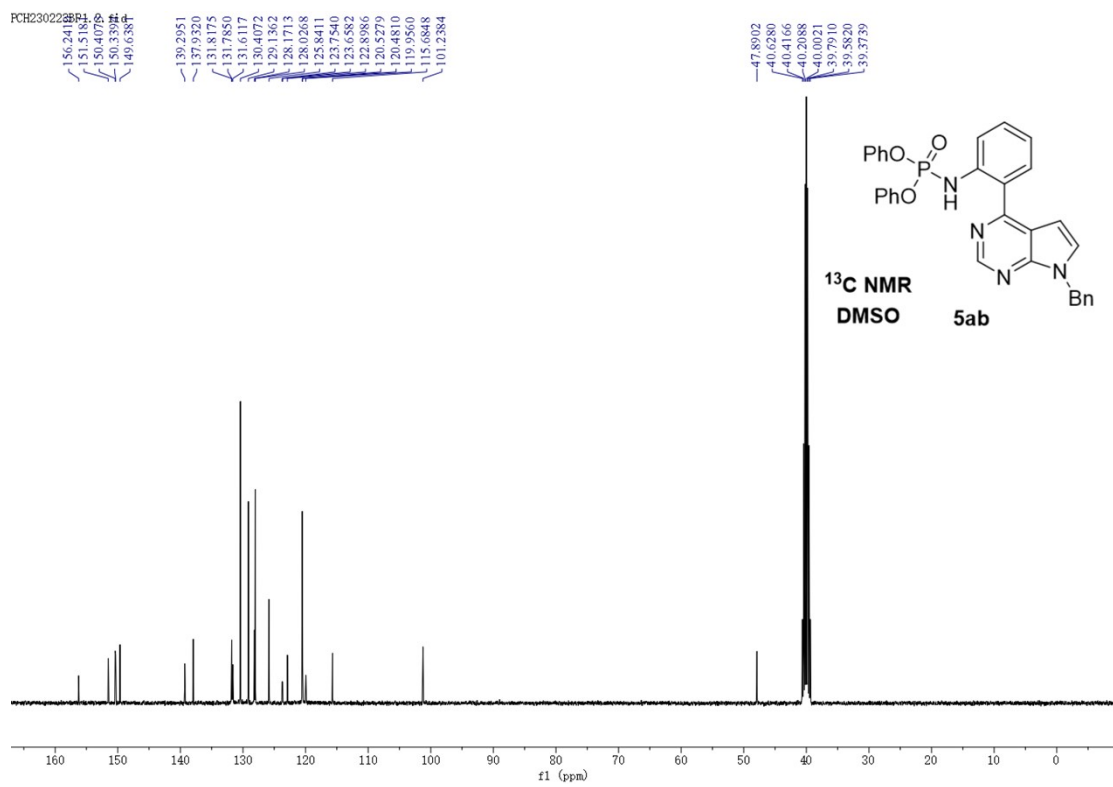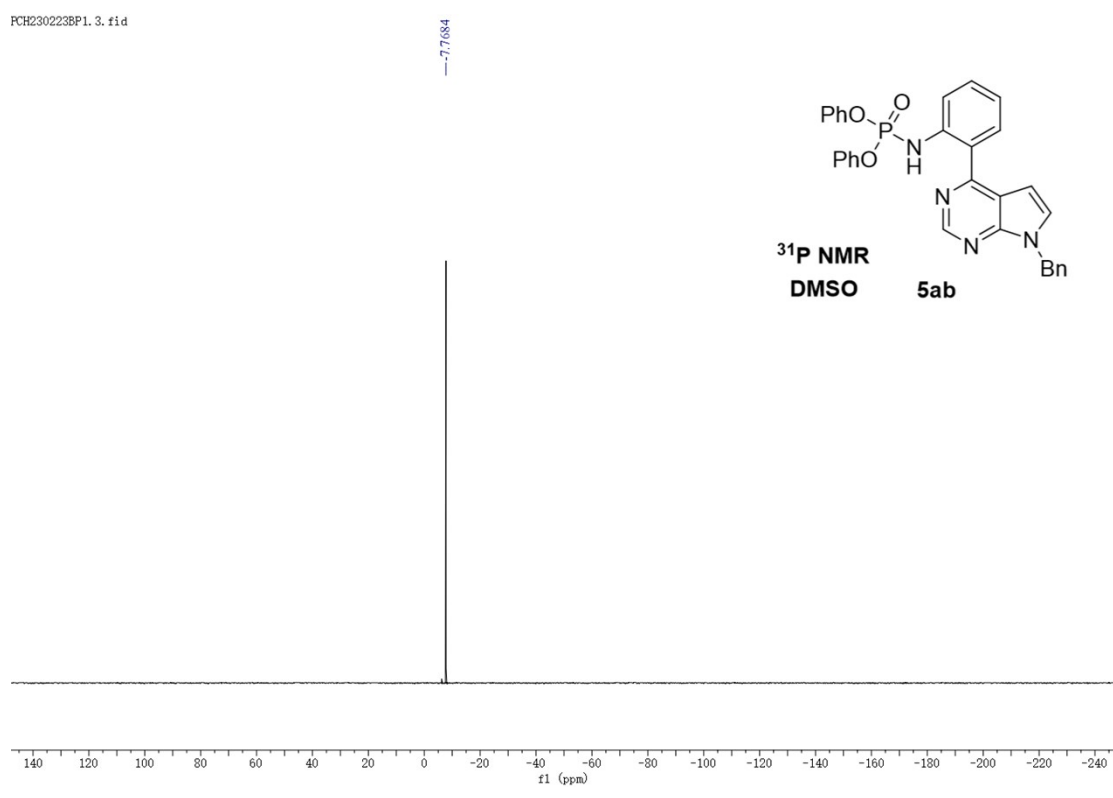

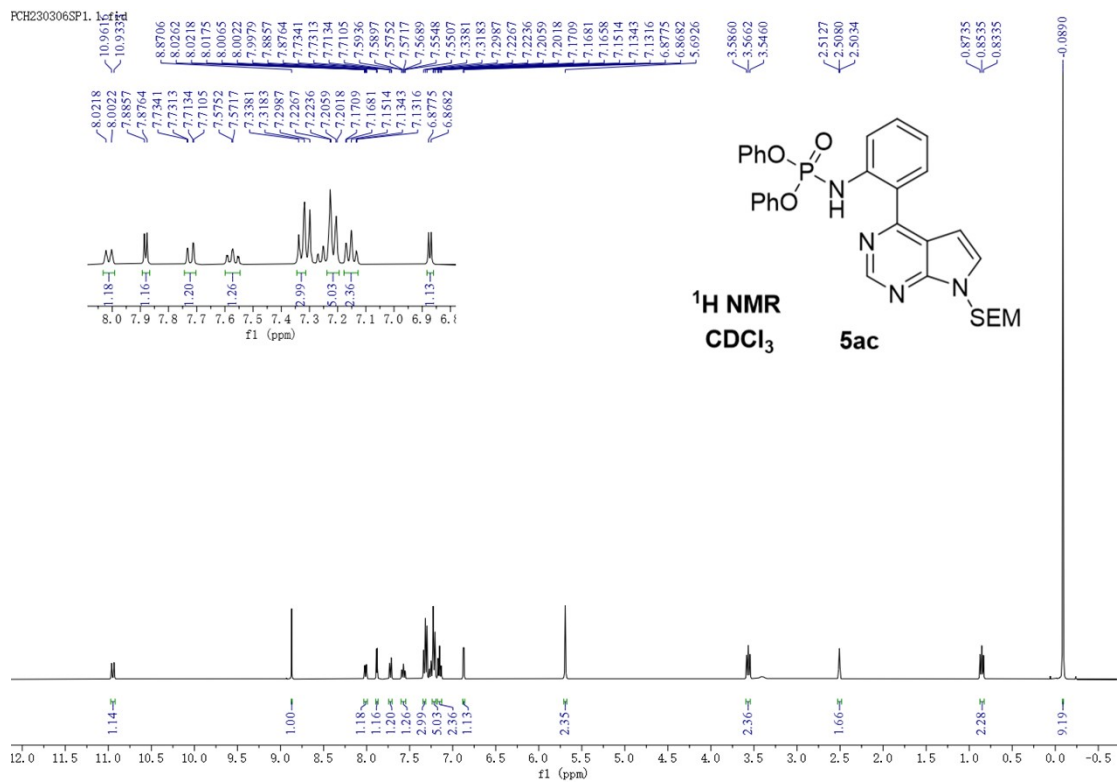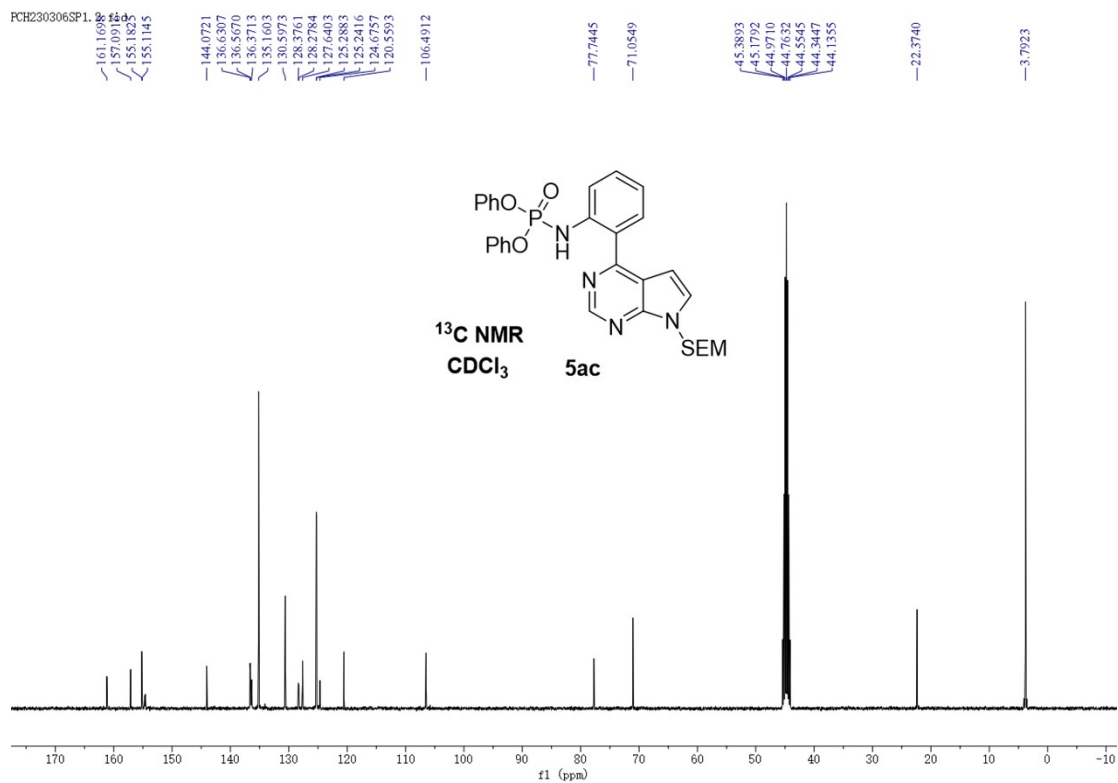



PCH230306SP1. 3. f1d

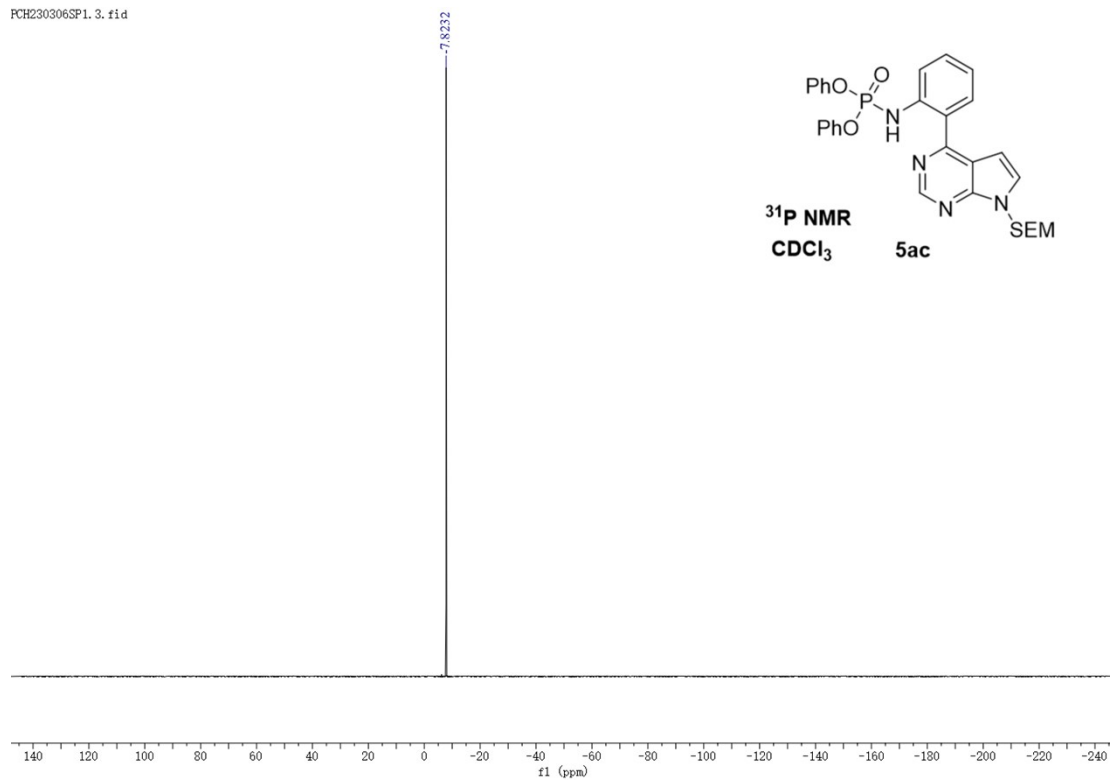

PCH230228TP1. 1. f1d

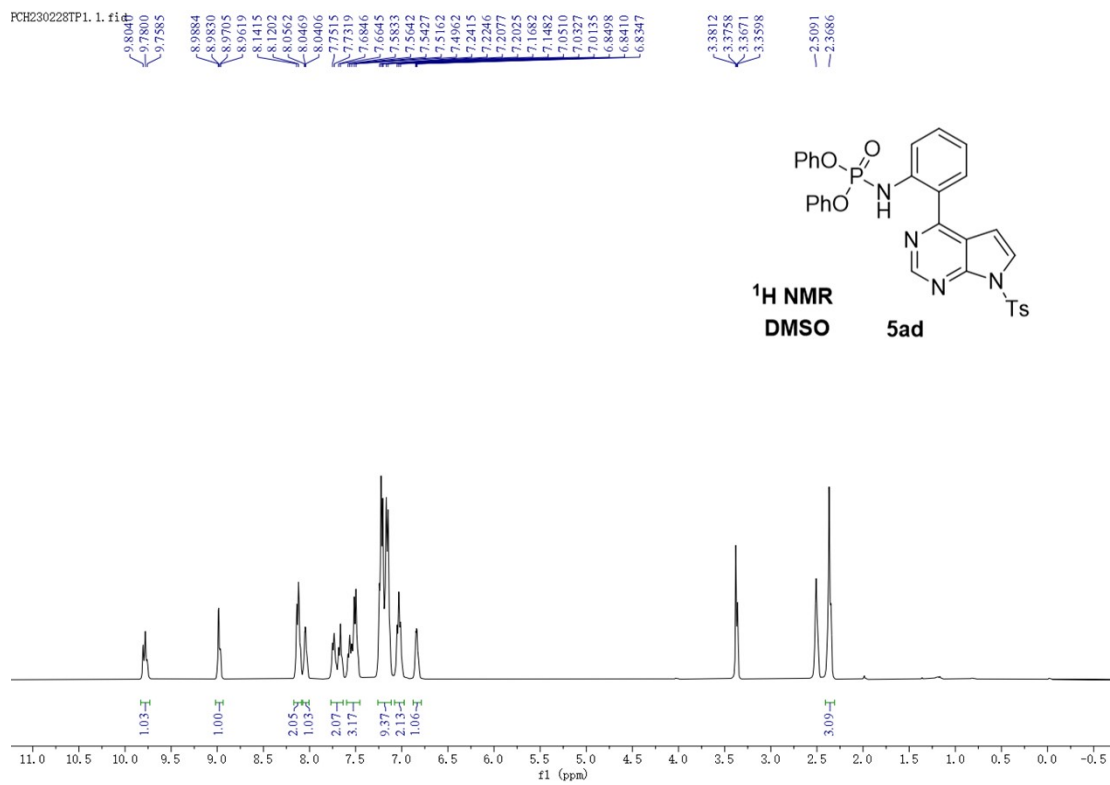

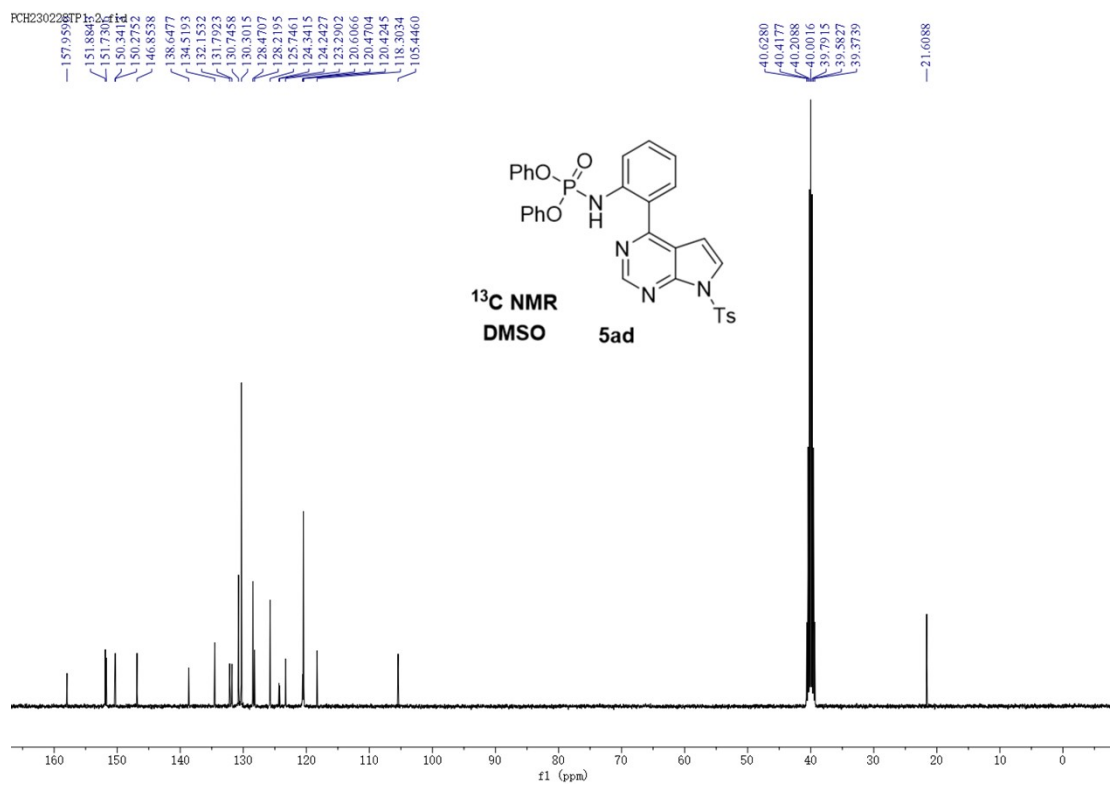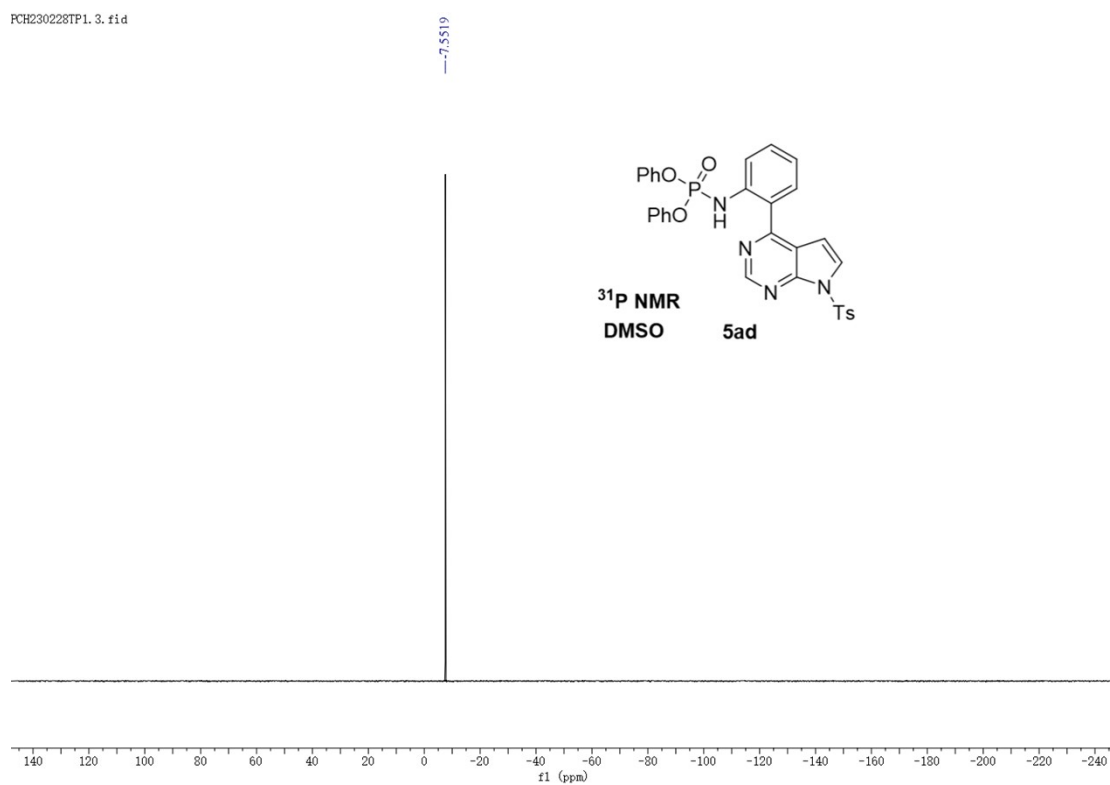

PCH280519P2.1.fid

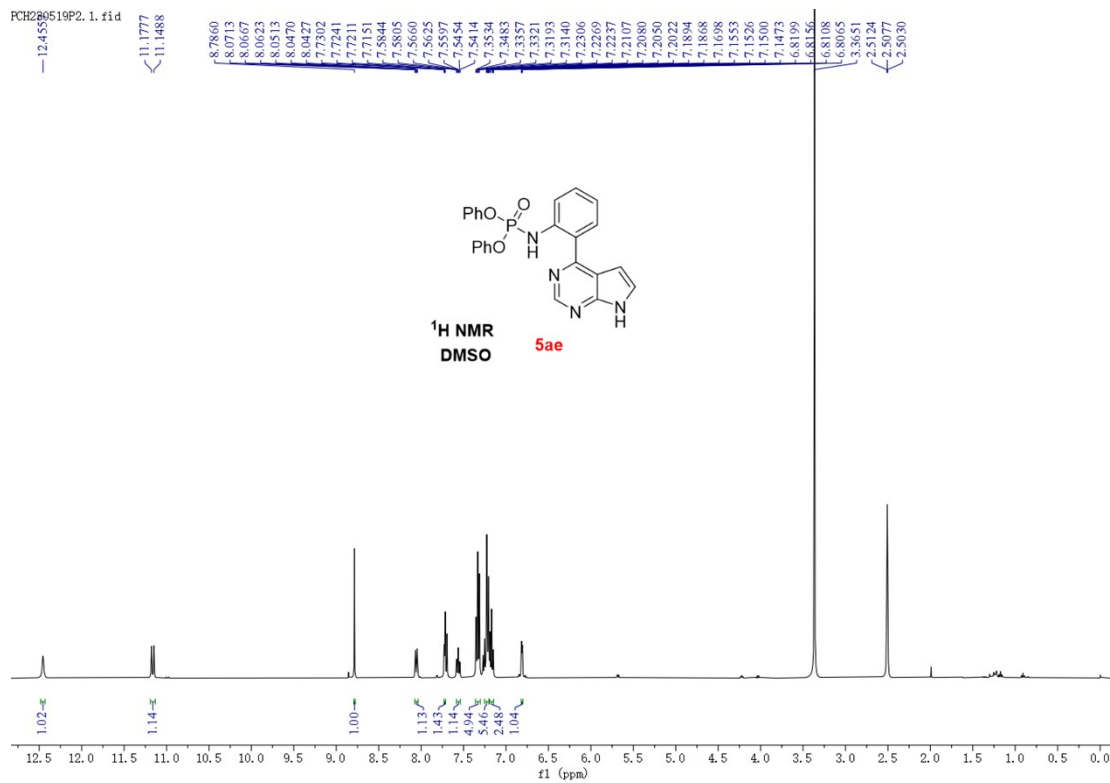

PCH280519P2.1.fid

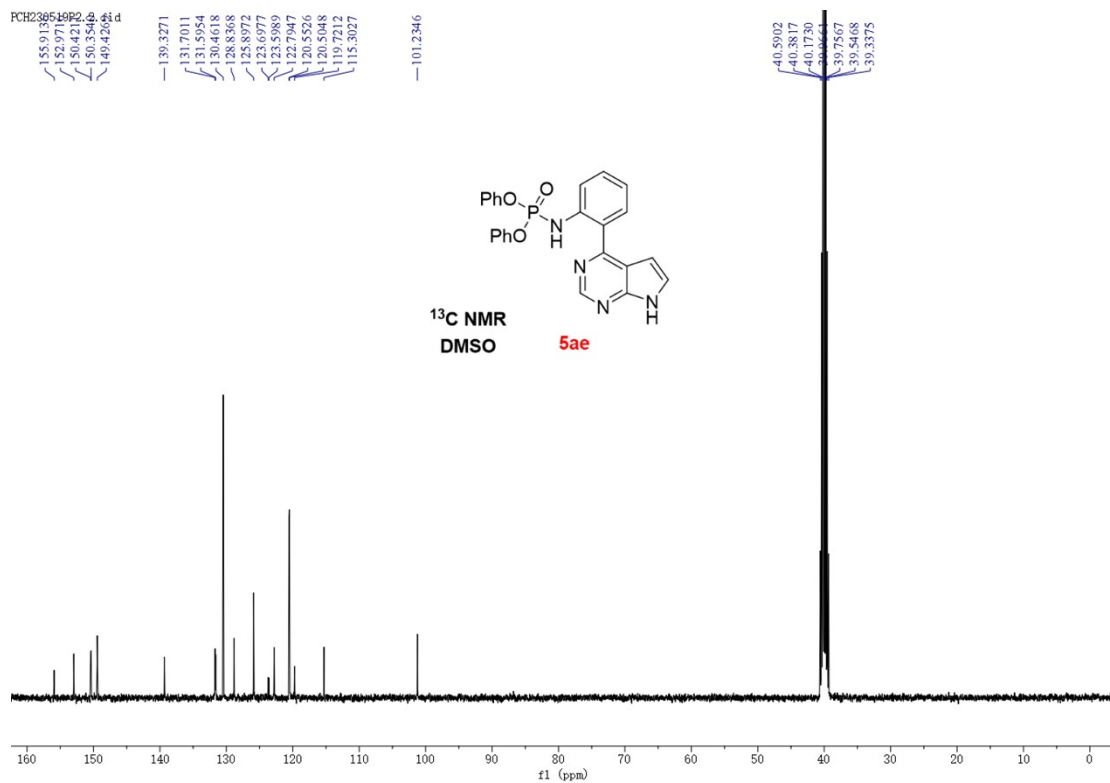

PCH23040519P2. 1. fid

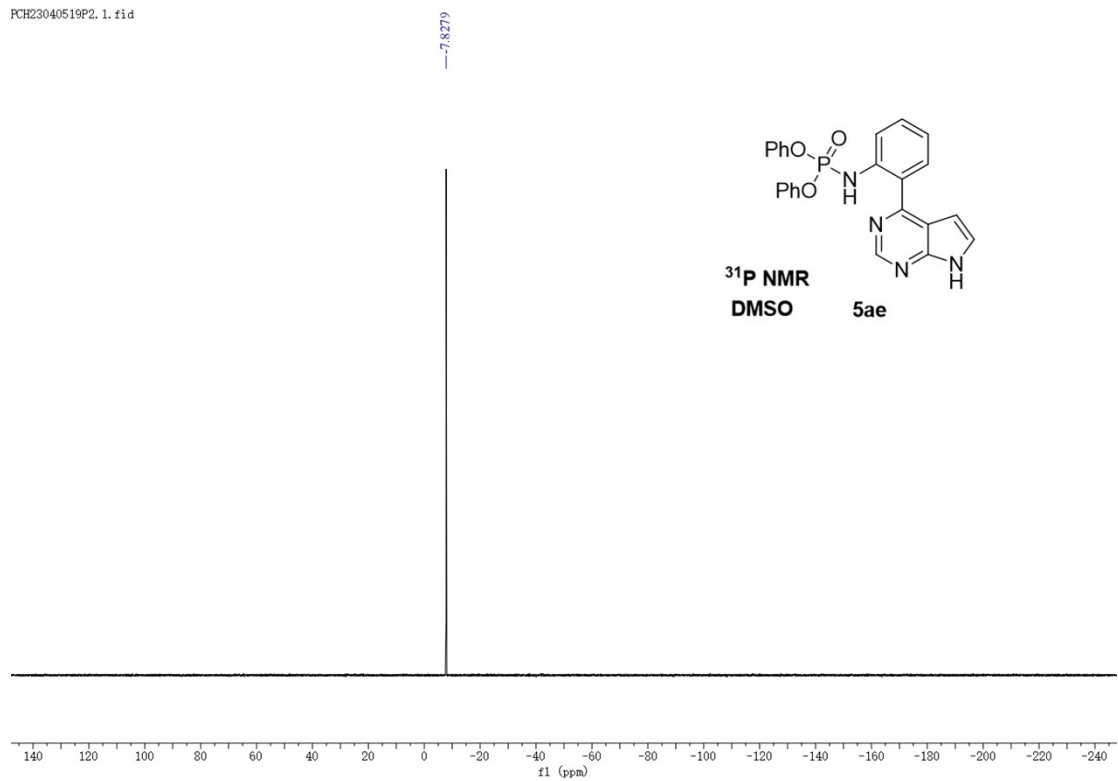

PCH-2304246P2. 1. fid

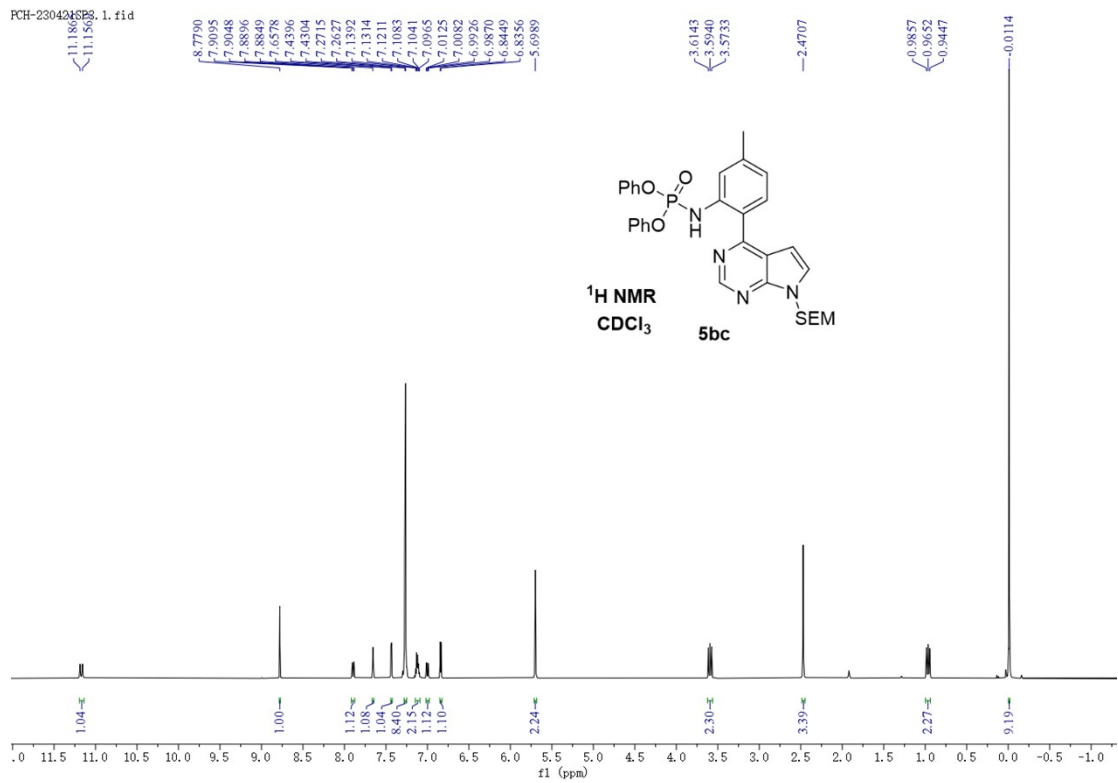

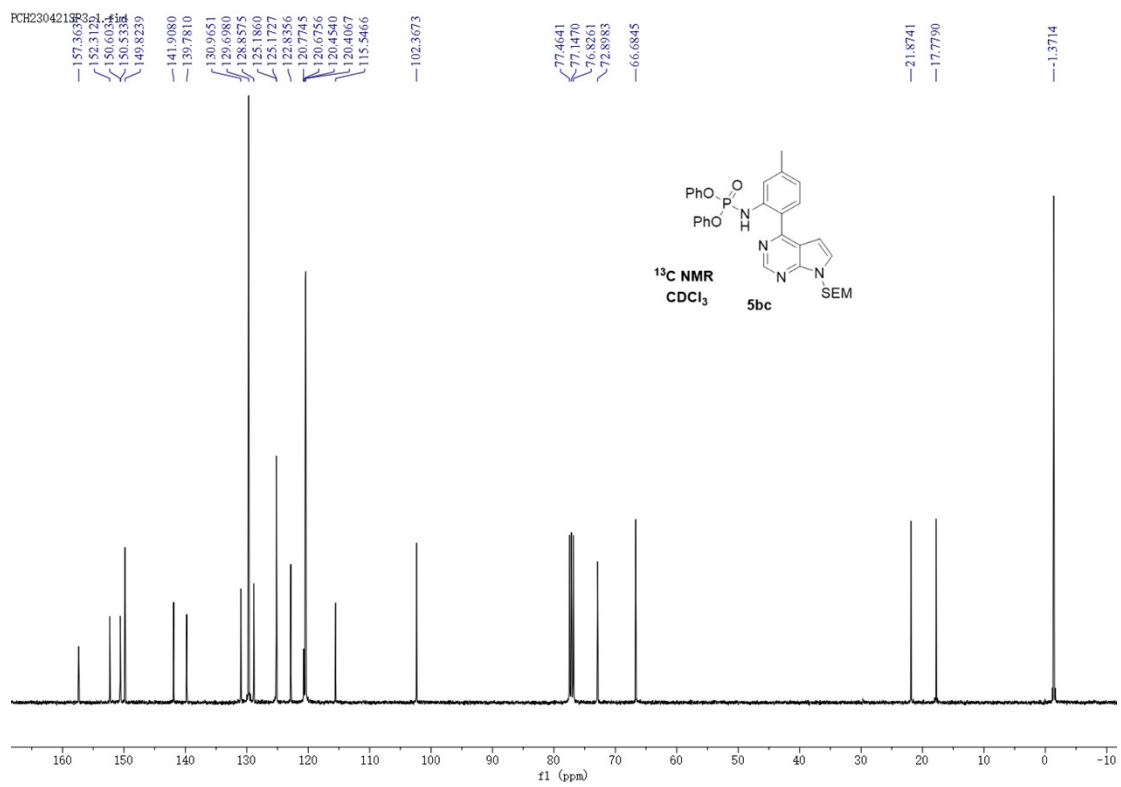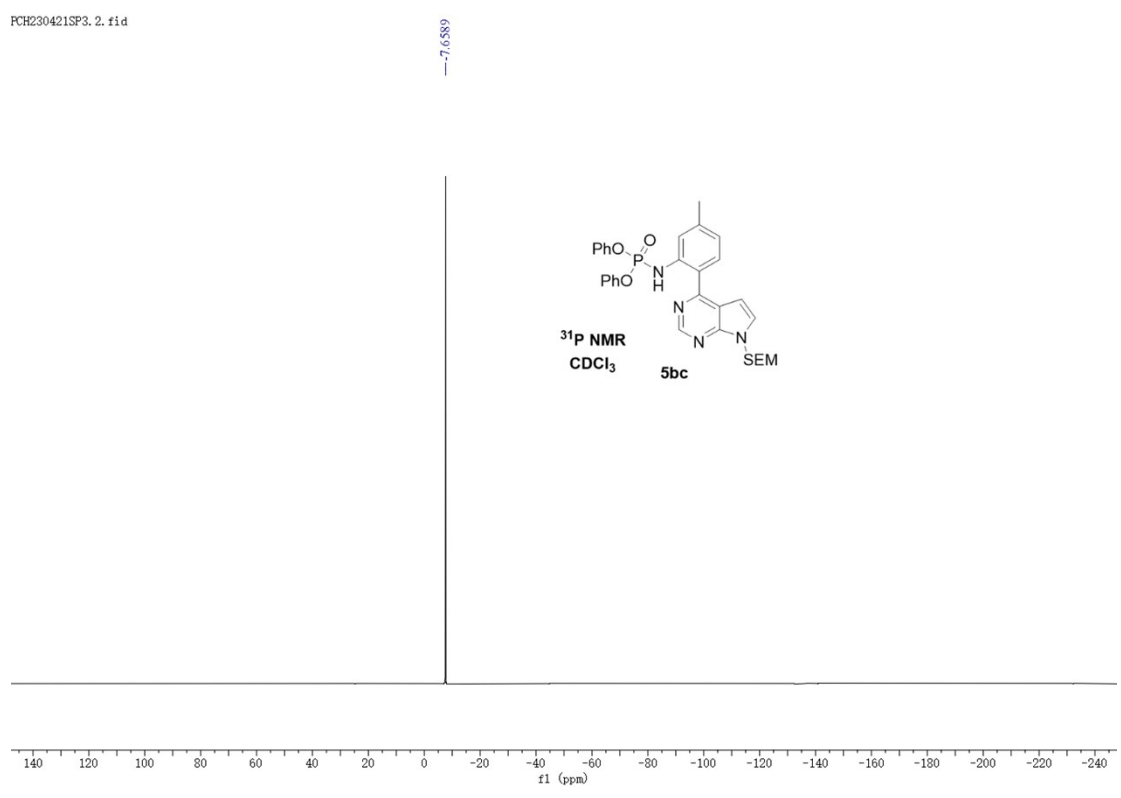

PCH-230424.1.fid

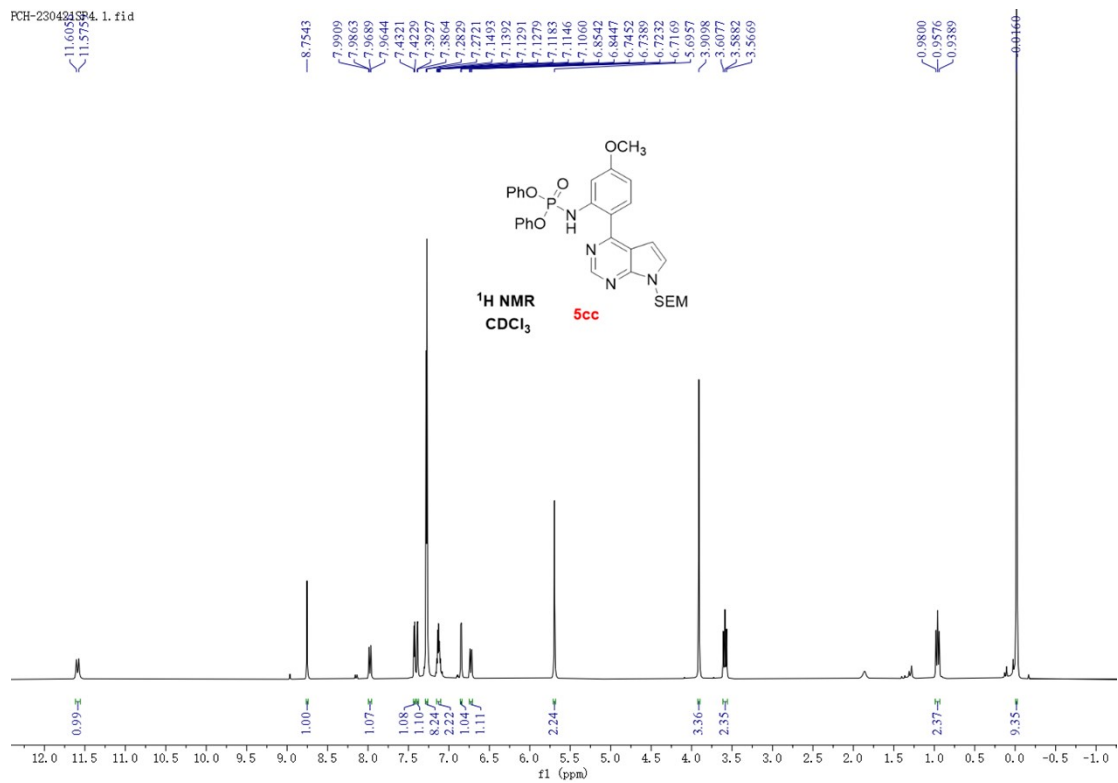

PCH-230424.1.fid

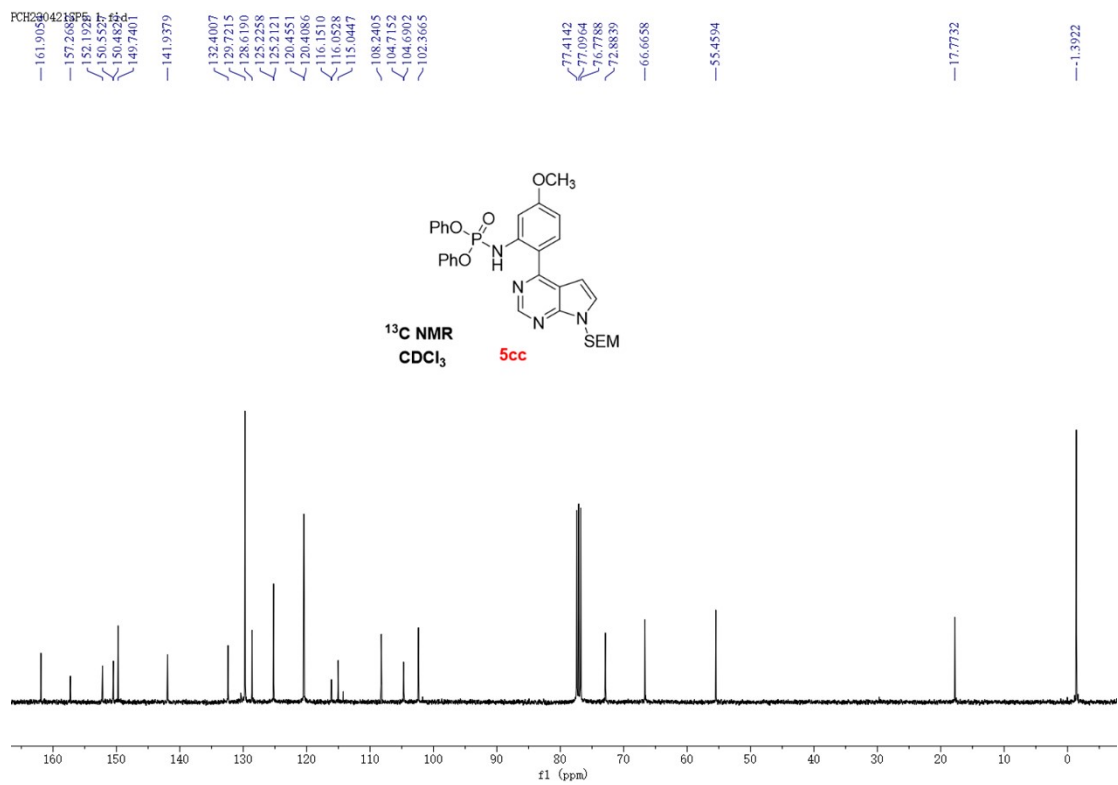

PCH230421SP5. 2. fid

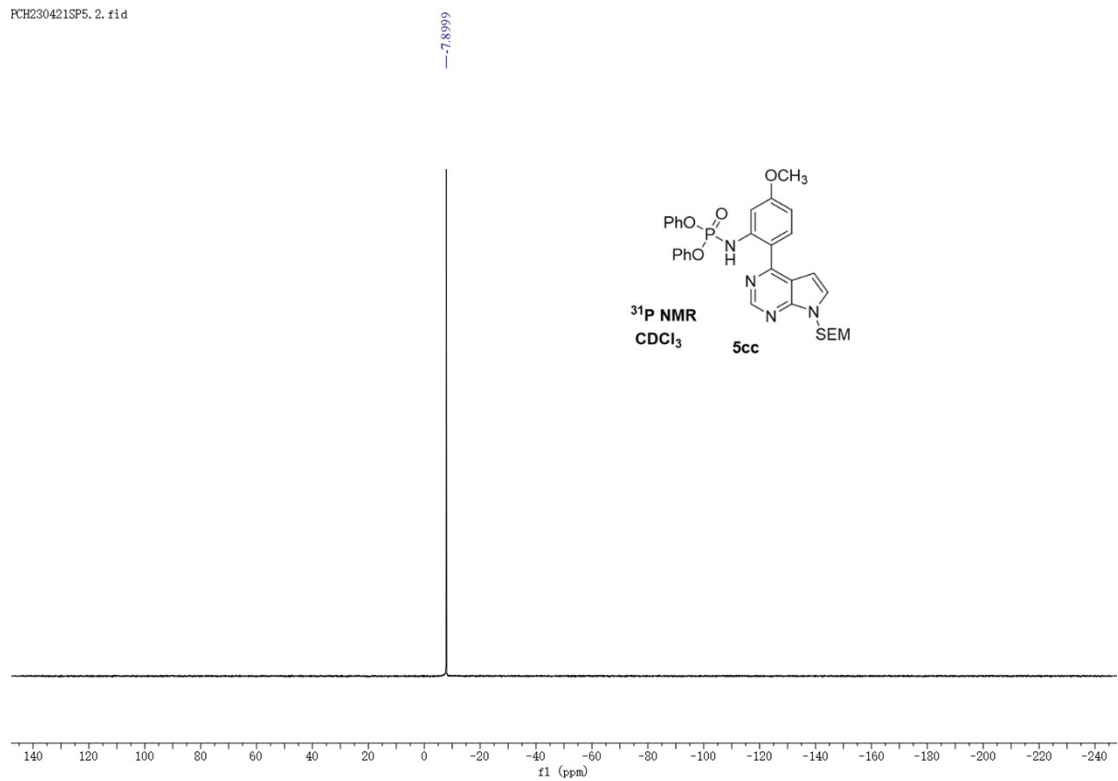

PCH-230421SP2. fid

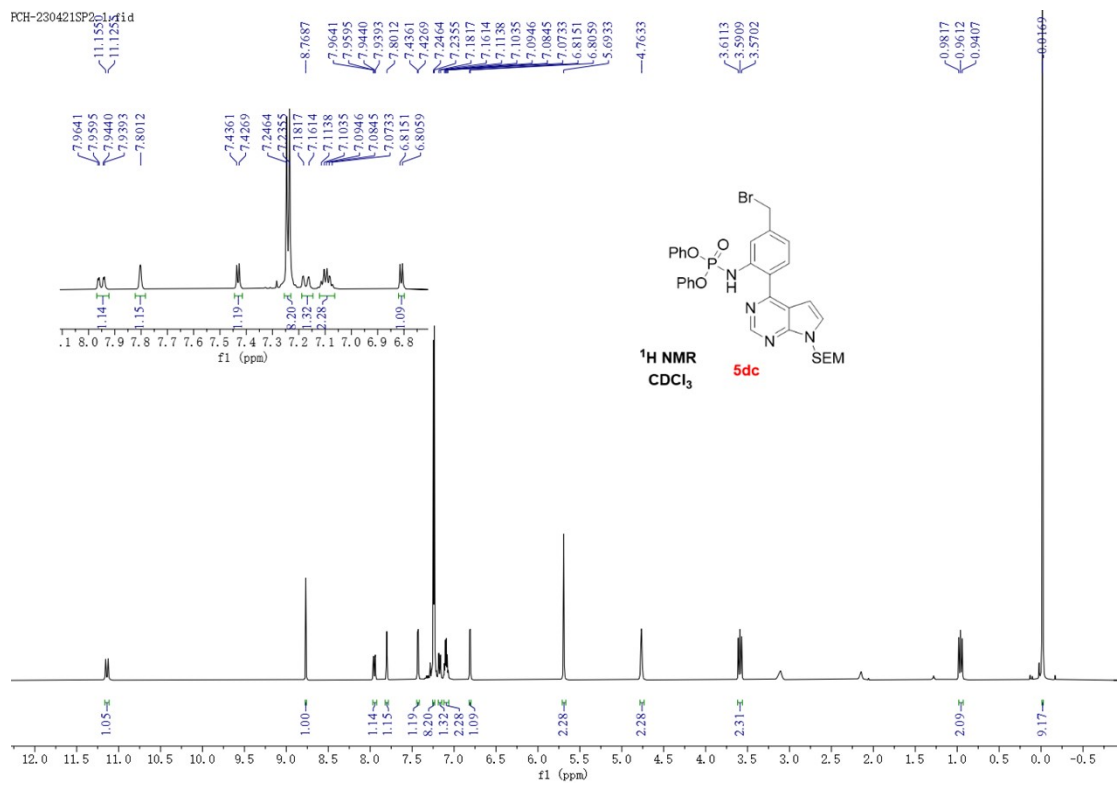

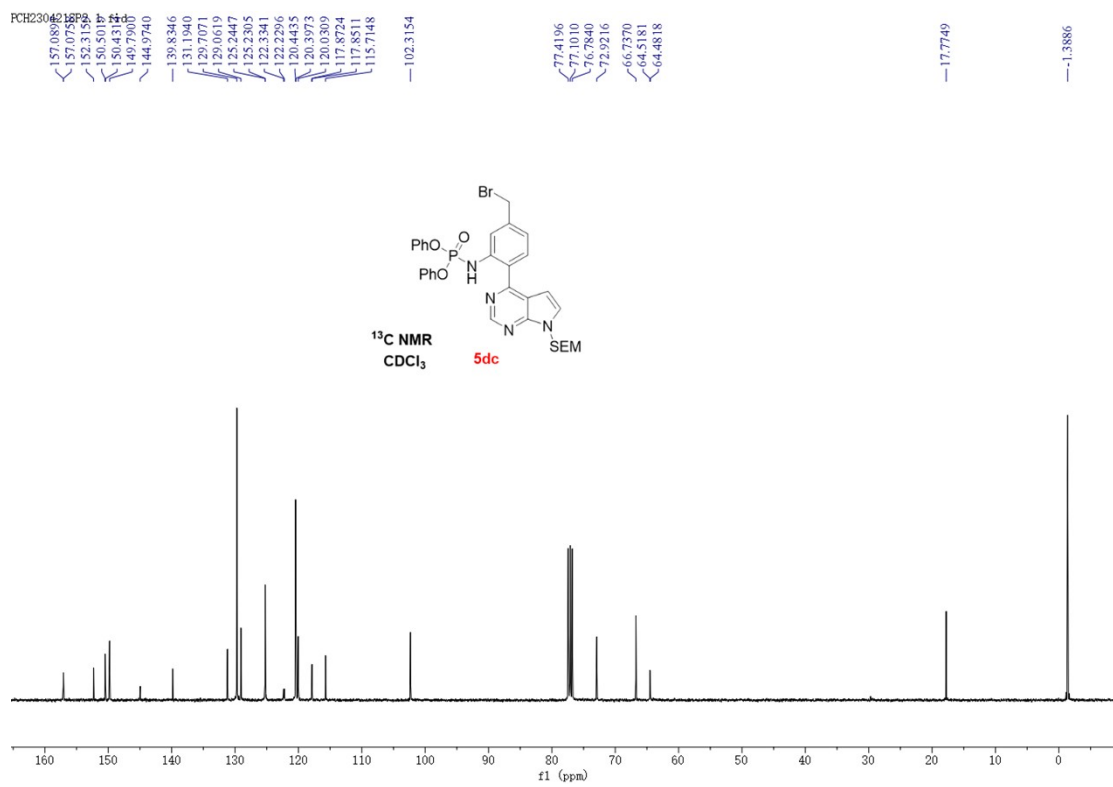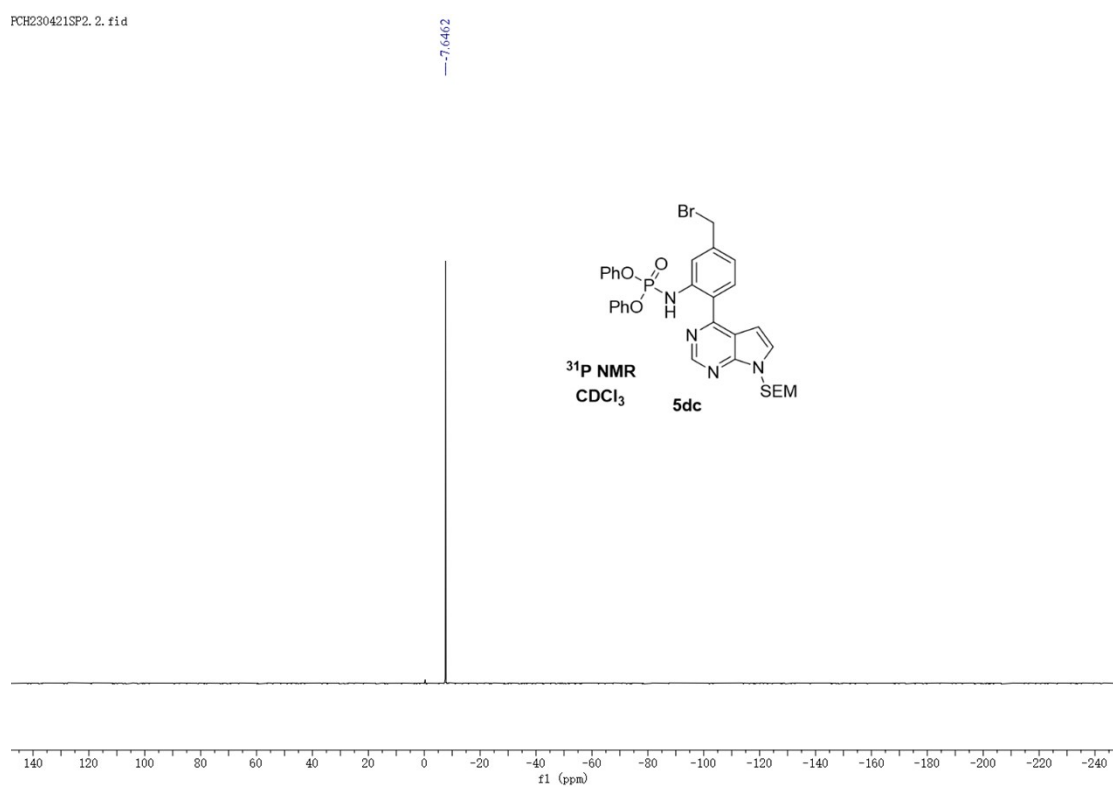



PCH230425SP6.1.fid

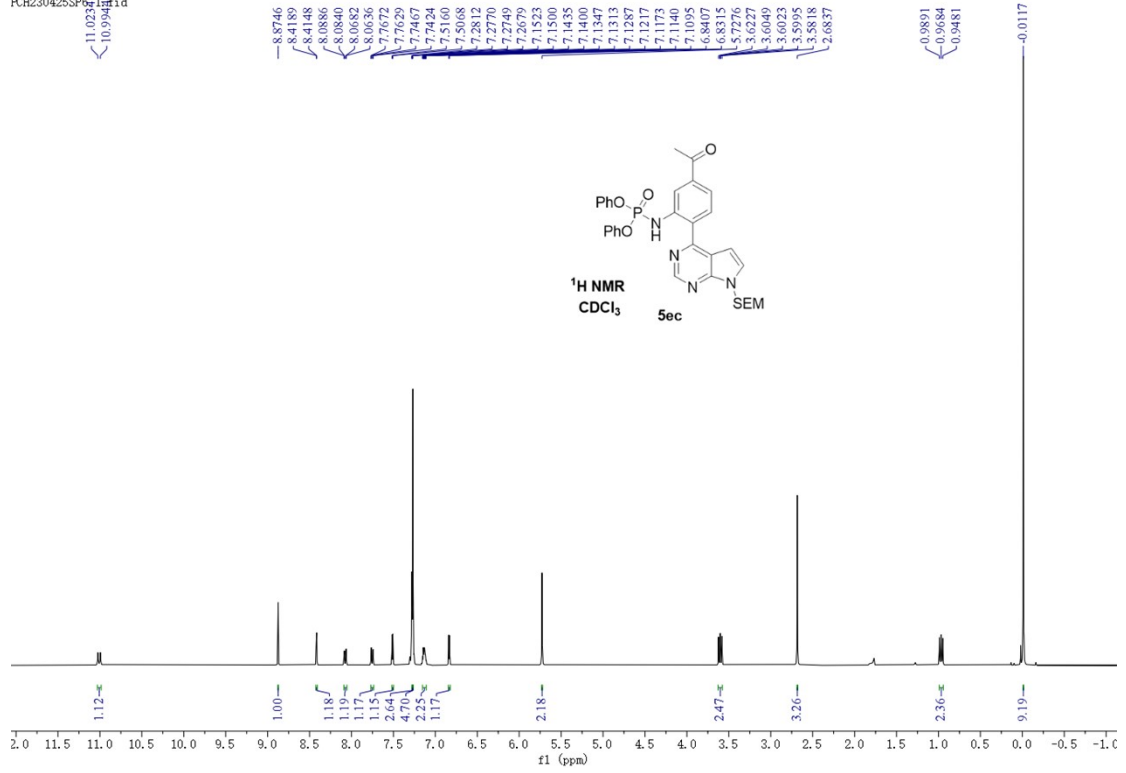

PCH230424SP6.1.fid

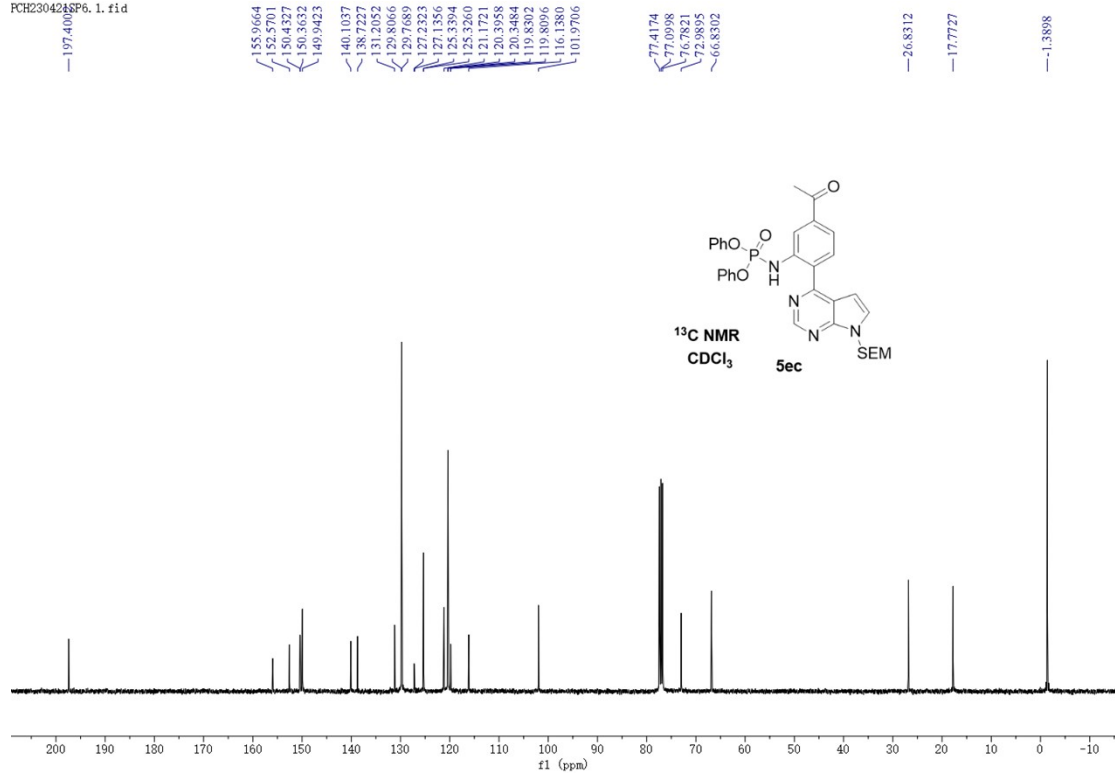

-8.1972

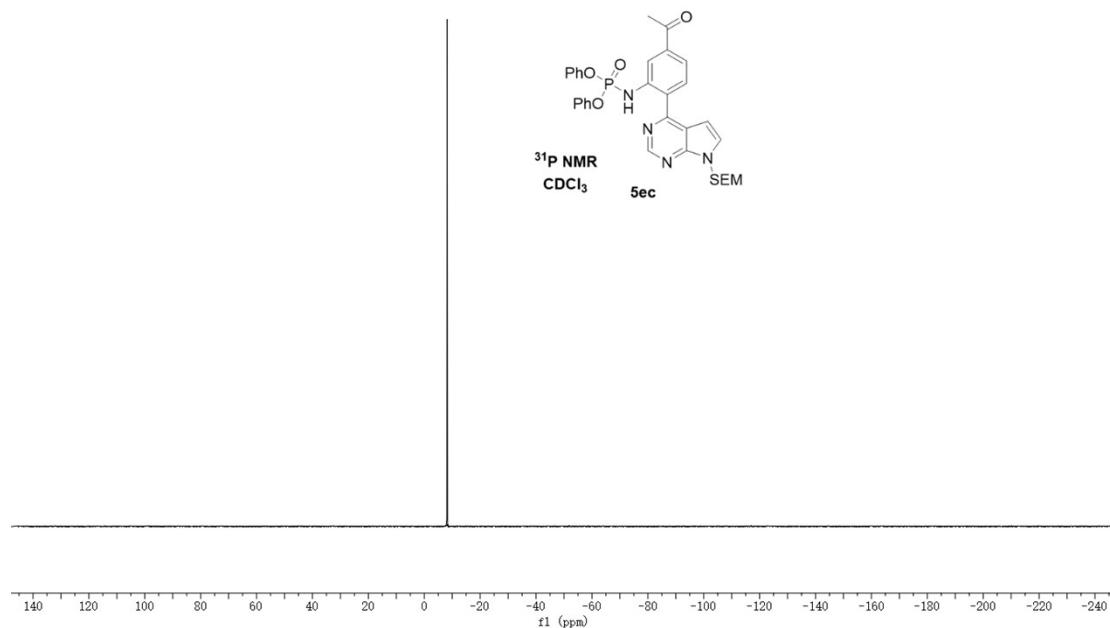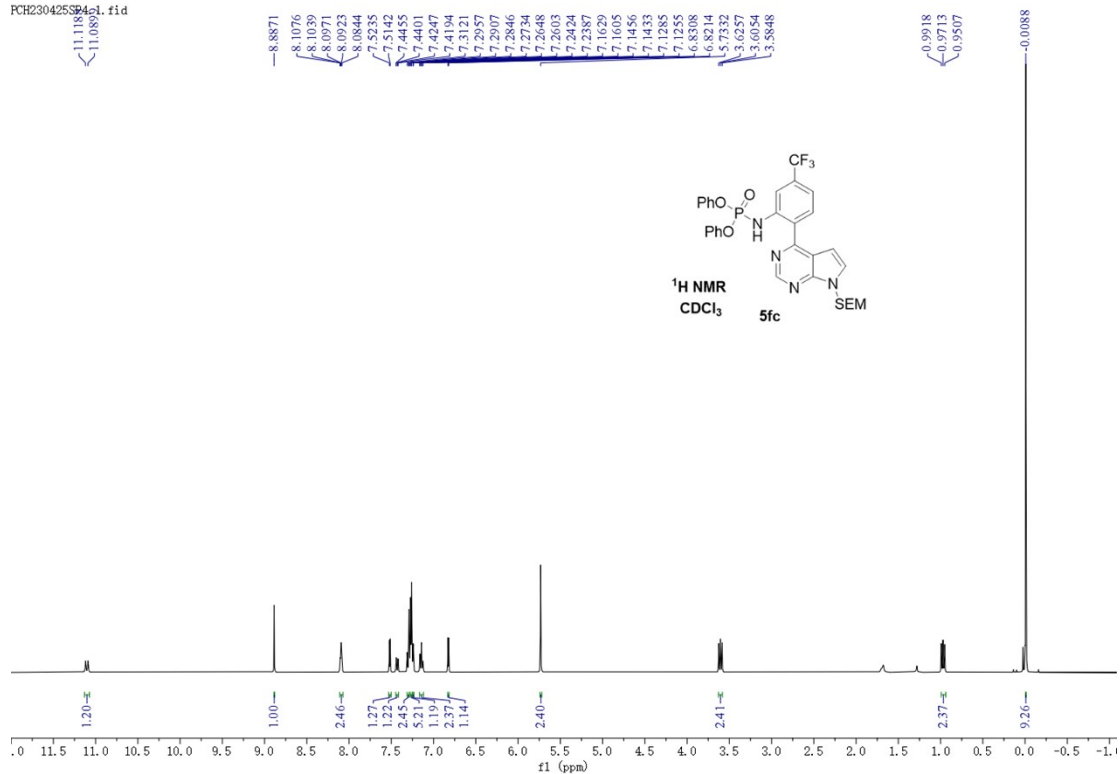

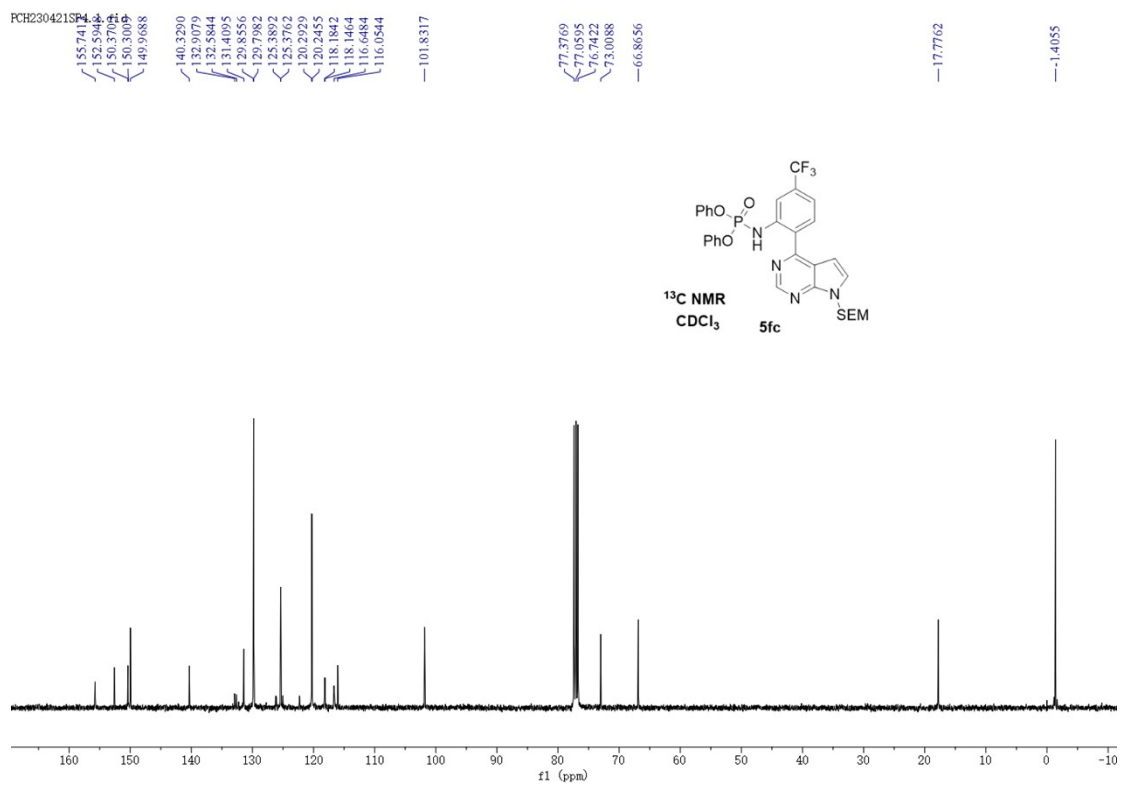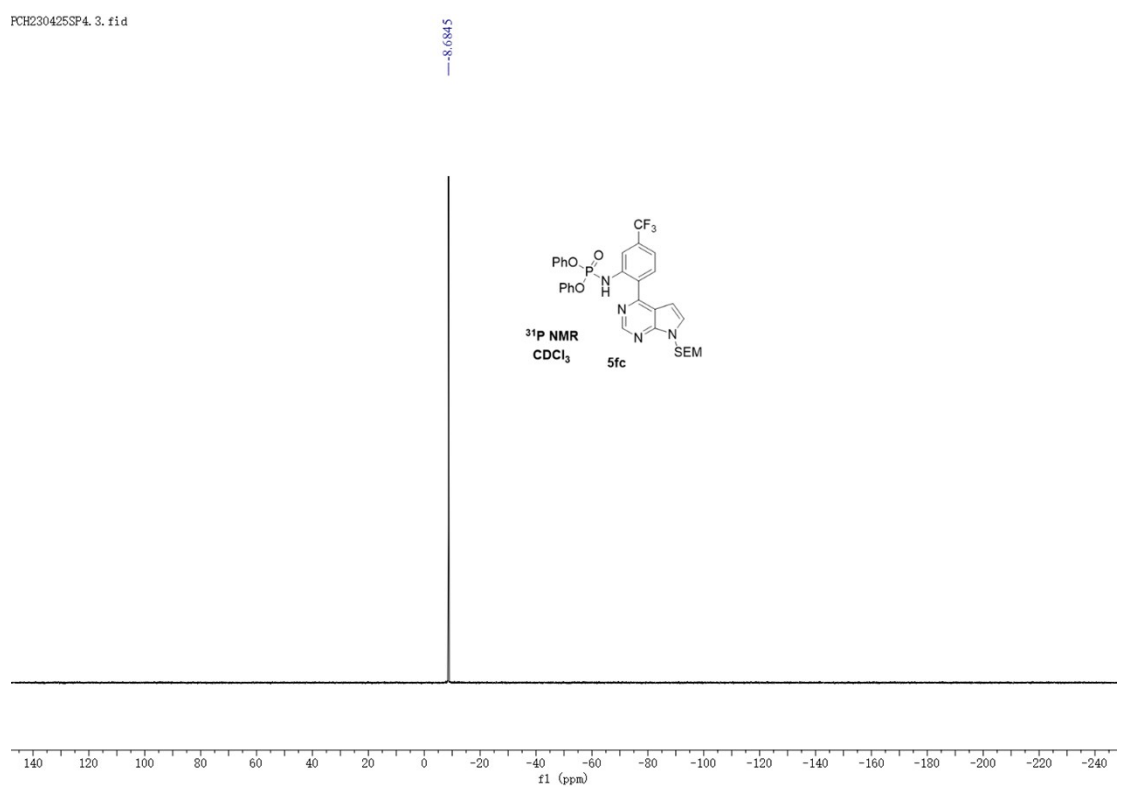

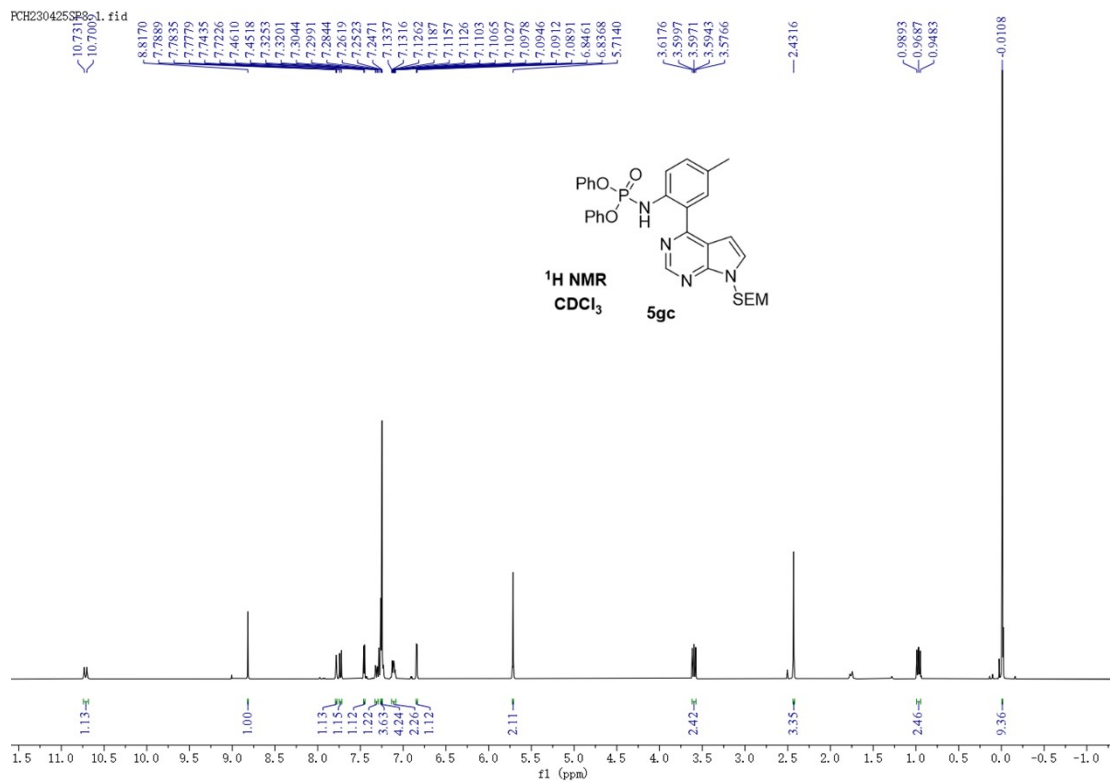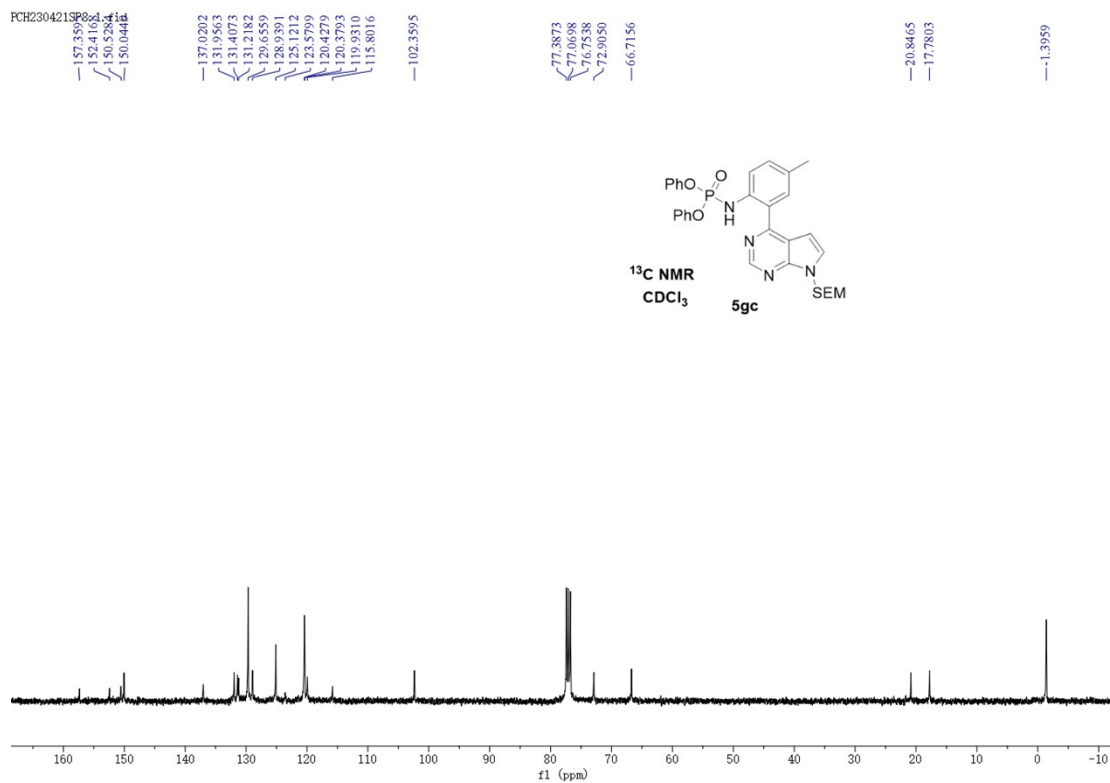

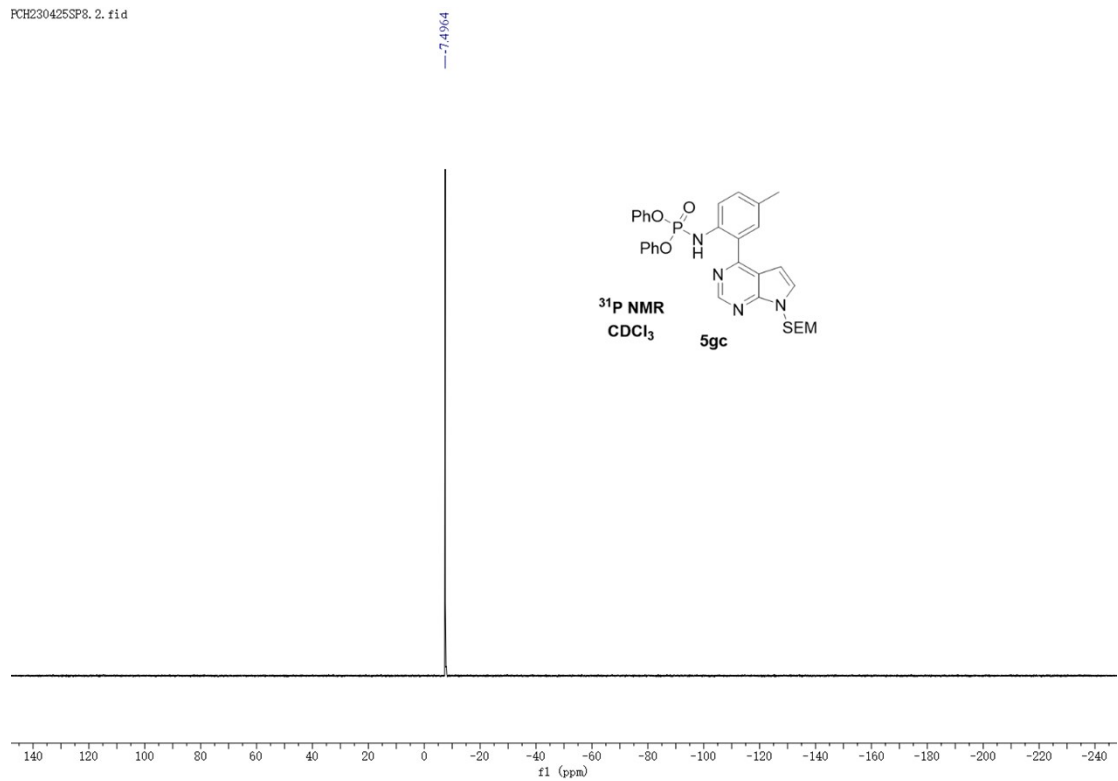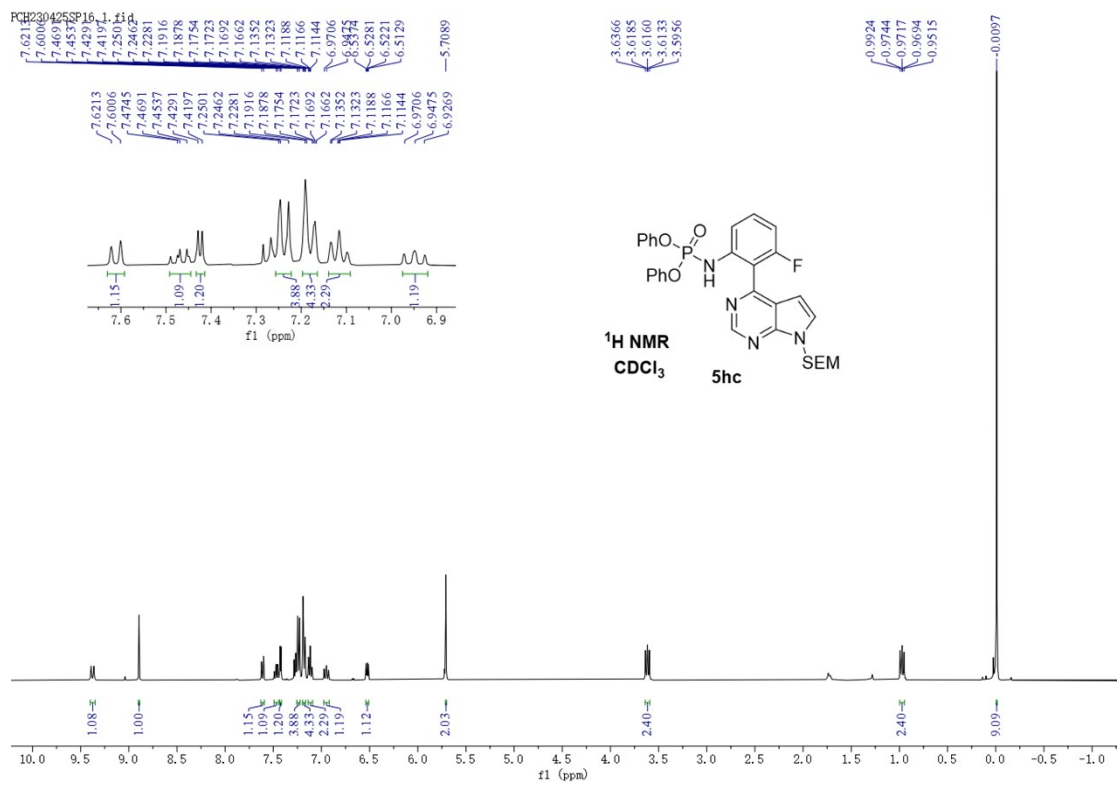

PCH230421SP16

161.9646  
150.4574  
152.2446  
150.5405  
150.2867  
150.2176

140.0717  
131.8980  
131.7923  
128.7167  
128.9225  
128.9322  
125.3181  
120.2971  
120.2498  
118.3280  
118.3043  
115.4960  
109.9800  
102.8286  
102.7228

77.3872  
77.0695  
76.7517  
72.9277  
66.7819

17.7755

1.3952

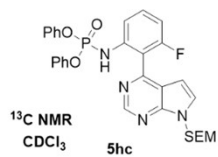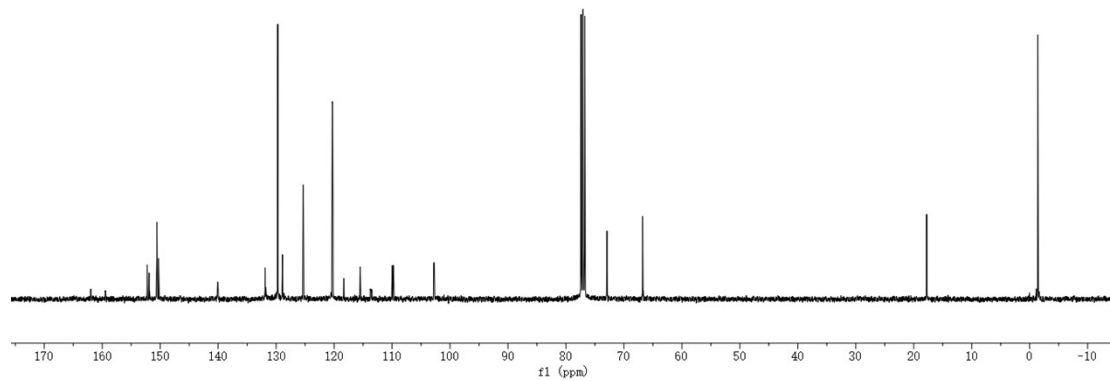

PCH230425SP16.3.fid

-8.2840

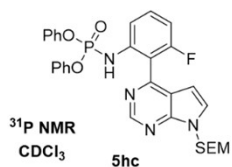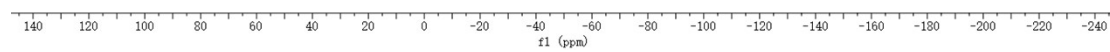

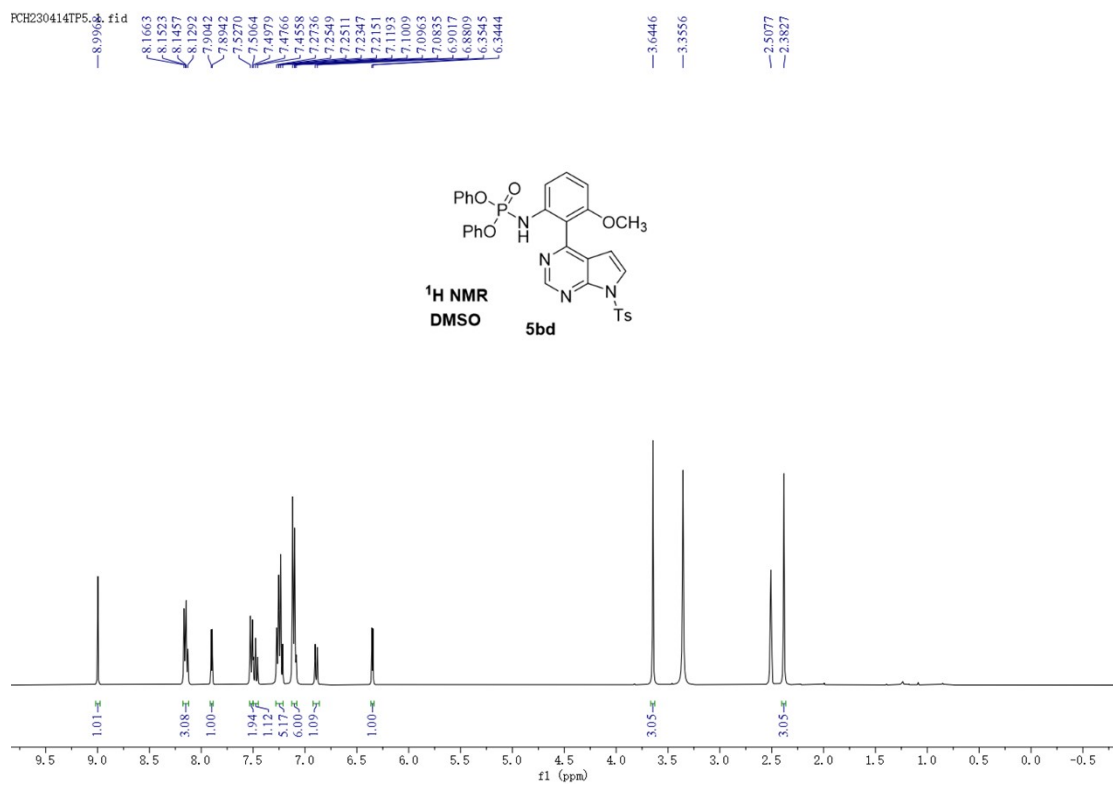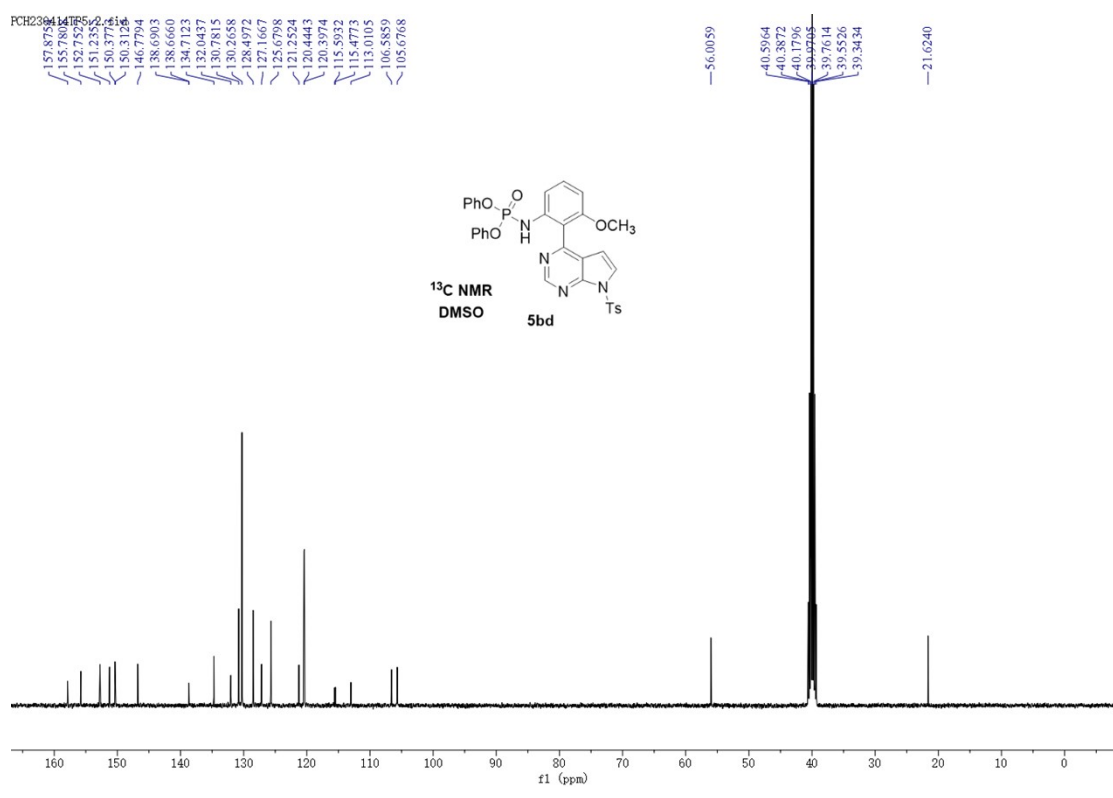

-7.0732

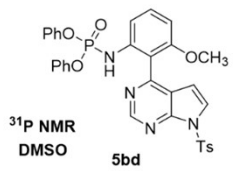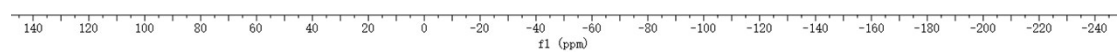

Supplement: d3ob01946b1.pdf [file d3ob01946b1.pdf]
